# Supplementary material for: Unravelling the physical and physiological basis for the solar-inducedchlorophyll fluorescence and photosynthesis relationship
Source: Copernicus journal article supplement (doi:10.5194/bg-2020-323), 2020-09-08
Supplement: Supplementary file 1 [file Data_Used_in_paper.xlsx]

## Sheet: CanopyMeasurements
Datetime	F760 (mW/m2/sr/nm)	GPP (mg/m2/s)	iPAR (umol/m2/s)	fAPAR
'10-Jul-2017 14:15:00'	0.978951	1.3041	1971.19	0.512693
'10-Jul-2017 14:45:00'	0.572349	1.3041	1987.77	0.490982
'10-Jul-2017 15:15:00'	0.478727	1.4495	594.707	0.6332
'10-Jul-2017 15:45:00'	0.529747	1.3274	1745.3	0.644864
'10-Jul-2017 16:15:00'	0.478073	1.2222	1410.62	0.648487
'10-Jul-2017 16:45:00'	0.419003	1.0602	1248.43	0.633131
'10-Jul-2017 17:15:00'	0.320983	0.70766	949.148	0.675104
'10-Jul-2017 17:45:00'	0.461607	1.033	762.87	0.722735
'11-Jul-2017 09:15:00'	0.226877	0.95101	455.377	0.68145
'11-Jul-2017 09:45:00'	0.423234	1.2222	1218.07	0.674748
'11-Jul-2017 10:15:00'	0.503938	1.6427	1210.03	0.678838
'11-Jul-2017 10:45:00'	0.389188	0.99461	1462.14	0.649087
'11-Jul-2017 11:15:00'	0.4492	1.4747	811.243	0.663427
'11-Jul-2017 11:45:00'	0.254255	0.80921	398.076	0.680021
'11-Jul-2017 12:15:00'	0.267466	0.69608	352.746	0.655761
'11-Jul-2017 12:45:00'	0.492696	1.5606	998.632	0.571261
'11-Jul-2017 13:15:00'	0.367875	1.2809	1099.47	0.588702
'11-Jul-2017 13:45:00'	0.322036	1.0592	547.098	0.668704
'11-Jul-2017 14:15:00'	0.426578	1.1561	647.718	0.638636
'11-Jul-2017 14:45:00'	0.808608	1.717	1672.2	0.544106
'11-Jul-2017 15:15:00'	0.747143	1.5366	1555.17	0.566851
'11-Jul-2017 15:45:00'	0.715048	1.6152	1428.3	0.610888
'11-Jul-2017 16:15:00'	0.730942	1.6867	1312.8	0.649788
'11-Jul-2017 16:45:00'	0.600528	1.3532	890.365	0.719395
'11-Jul-2017 17:15:00'	0.247938	0.99964	367.839	0.659404
'11-Jul-2017 17:45:00'	0.217605	0.83389	346.185	0.686608
'12-Jul-2017 09:15:00'	0.541985	1.3802	872.436	0.78588
'12-Jul-2017 09:45:00'	0.539191	1.4119	1082.01	0.724047
'12-Jul-2017 10:15:00'	0.682809	1.8737	1290.87	0.70684
'12-Jul-2017 10:45:00'	0.708497	2.0984	1404.77	0.69826
'12-Jul-2017 11:15:00'	0.510409	1.6256	905.298	0.658859
'12-Jul-2017 11:45:00'	0.28827	0.96161	410.231	0.711241
'12-Jul-2017 12:15:00'	0.371192	1.2748	573.932	0.697263
'12-Jul-2017 12:45:00'	0.803407	2.0374	1009.41	0.596142
'12-Jul-2017 13:15:00'	0.548517	1.8927	887.126	0.599668
'12-Jul-2017 13:45:00'	0.993358	2.1277	1590.26	0.569381
'12-Jul-2017 14:15:00'	0.298184	1.0305	551.416	0.675128
'12-Jul-2017 14:45:00'	0.251232	0.73059	522.951	0.658545
'12-Jul-2017 15:15:00'	0.372694	1.032	639.036	0.684899
'12-Jul-2017 15:45:00'	0.281674	0.7597	385.091	0.697087
'12-Jul-2017 16:15:00'	0.21016	0.69807	303.568	0.666372
'12-Jul-2017 16:45:00'	0.484478	1.1578	606.322	0.706702
'12-Jul-2017 17:15:00'	0.529709	1.7161	818.034	0.731487
'12-Jul-2017 17:45:00'	0.39038	1.3154	573.286	0.739523
'13-Jul-2017 09:15:00'	0.569904	1.3281	891.968	0.791032
'13-Jul-2017 09:45:00'	0.602468	1.7664	1075.13	0.752305
'13-Jul-2017 10:15:00'	0.592263	1.8723	1298.95	0.746382
'13-Jul-2017 10:45:00'	0.719079	1.9325	1351.13	0.709326
'13-Jul-2017 11:15:00'	0.822525	1.9901	1326.67	0.650163
'13-Jul-2017 11:45:00'	0.818207	1.8308	1425.83	0.6434
'13-Jul-2017 12:15:00'	0.809718	1.7223	1150.43	0.638295
'13-Jul-2017 12:45:00'	0.982779	1.8386	1700.5	0.587767
'13-Jul-2017 13:15:00'	0.849204	2.0967	1417.1	0.613318
'13-Jul-2017 13:45:00'	1.13476	1.6464	1250.04	0.580608
'13-Jul-2017 14:15:00'	0.485716	1.2725	843.629	0.663397
'13-Jul-2017 14:45:00'	0.689918	1.8354	986.565	0.604865
'13-Jul-2017 15:15:00'	0.505288	1.4821	610.203	0.705274
'13-Jul-2017 15:45:00'	0.425745	1.3381	1037.77	0.702989
'13-Jul-2017 16:15:00'	0.525664	1.4018	428.867	0.751462
'13-Jul-2017 16:45:00'	0.558157	1.2191	1067.32	0.728125
'13-Jul-2017 17:15:00'	0.656572	1.3675	1155.09	0.756915
'13-Jul-2017 17:45:00'	0.294083	0.80915	810.386	0.788661
'14-Jul-2017 09:15:00'	0.470164	1.2242	941.43	0.738231
'14-Jul-2017 09:45:00'	0.433003	1.355	990.004	0.764229
'14-Jul-2017 10:15:00'	0.555326	1.5444	1190.84	0.745309
'14-Jul-2017 10:45:00'	0.596377	1.3695	1306.35	0.671411
'14-Jul-2017 11:15:00'	0.45885	1.3947	877.623	0.66117
'14-Jul-2017 11:45:00'	0.662039	2.0201	658.473	0.629737
'14-Jul-2017 12:15:00'	0.659194	1.9609	1931.59	0.510921
'14-Jul-2017 12:45:00'	0.624739	1.6937	1863.94	0.451908
'14-Jul-2017 13:15:00'	0.792873	1.8285	2132.96	0.399429
'14-Jul-2017 13:45:00'	0.685497	1.5958	1952.8	0.322794
'14-Jul-2017 14:15:00'	0.752794	1.3032	1985.24	0.573055
'14-Jul-2017 14:45:00'	0.836064	1.6964	1846.49	0.483906
'14-Jul-2017 15:15:00'	0.327692	0.96877	282.882	0.728848
'14-Jul-2017 15:45:00'	0.275821	0.82898	315.876	0.678526
'14-Jul-2017 16:15:00'	0.244414	0.8471	509.19	0.630243
'14-Jul-2017 16:45:00'	0.00960559	NaN	206.257	0.670401
'14-Jul-2017 17:15:00'	0.0069557	NaN	206.257	0.670401
'15-Jul-2017 09:15:00'	0.489035	1.2928	951.163	0.777365
'15-Jul-2017 09:45:00'	0.226678	0.84846	452.995	0.756601
'15-Jul-2017 10:15:00'	0.394346	1.1986	375.486	0.778091
'15-Jul-2017 10:45:00'	0.60695	1.5977	1341.09	0.757428
'15-Jul-2017 11:15:00'	0.689492	1.334	713.44	0.732864
'15-Jul-2017 11:45:00'	1.69759	1.7422	1006.61	0.690998
'15-Jul-2017 12:15:00'	1.12373	1.5339	798.977	0.670821
'15-Jul-2017 12:45:00'	0.473221	1.084	490.255	0.701196
'15-Jul-2017 13:15:00'	0.935332	1.4273	790.992	0.594051
'15-Jul-2017 13:45:00'	1.56379	1.9439	866.656	0.543616
'15-Jul-2017 14:15:00'	1.34766	1.6395	710.022	0.579831
'15-Jul-2017 14:45:00'	1.29784	1.4793	946.734	0.570187
'15-Jul-2017 15:15:00'	1.16966	1.4565	979.613	0.62433
'15-Jul-2017 15:45:00'	0.704137	1.6697	1553.54	0.639024
'15-Jul-2017 16:15:00'	0.396419	1.1753	361.637	0.715591
'15-Jul-2017 16:45:00'	0.613568	1.297	1244.95	0.760288
'15-Jul-2017 17:15:00'	0.497428	1.0806	980.316	0.838314
'15-Jul-2017 17:45:00'	0.207967	0.79621	260.71	0.821723
'16-Jul-2017 09:15:00'	0.478119	1.2083	1004.85	0.782822
'16-Jul-2017 09:45:00'	0.526951	1.3949	1205.4	0.796697
'16-Jul-2017 10:15:00'	0.64053	1.4916	1411.29	0.801683
'16-Jul-2017 10:45:00'	0.62506	1.4581	1576.57	0.737575
'16-Jul-2017 11:15:00'	0.713924	1.3153	1715.23	0.69095
'16-Jul-2017 11:45:00'	0.740171	1.3883	1826.55	0.667992
'16-Jul-2017 12:15:00'	0.761919	1.7014	1929.29	0.635267
'16-Jul-2017 12:45:00'	0.650822	1.5086	2079.9	0.579507
'16-Jul-2017 13:15:00'	0.733176	1.4758	2068.04	0.513144
'16-Jul-2017 13:45:00'	0.834835	1.5056	2070.53	0.46419
'16-Jul-2017 14:15:00'	0.796069	1.7805	2263.21	0.488627
'16-Jul-2017 14:45:00'	0.818621	1.7078	2176.72	0.530116
'16-Jul-2017 15:15:00'	0.354199	0.97361	1917.25	0.634734
'16-Jul-2017 15:45:00'	0.49575	1.5621	1835.54	0.683267
'16-Jul-2017 16:15:00'	0.543997	1.2931	1569.88	0.693316
'16-Jul-2017 16:45:00'	0.296224	1.1524	293.568	0.754224
'16-Jul-2017 17:15:00'	0.455986	1.1933	1040.81	0.861567
'16-Jul-2017 17:45:00'	0.381991	1.245	802.454	0.905806
'17-Jul-2017 09:15:00'	0.446742	1.4087	1052.51	0.78817
'17-Jul-2017 09:45:00'	0.473409	1.3329	1208.78	0.814818
'17-Jul-2017 10:15:00'	0.513438	1.2844	1423.26	0.829782
'17-Jul-2017 10:45:00'	0.570877	1.6333	1642.86	0.757111
'17-Jul-2017 11:15:00'	0.71621	1.6663	1710.52	0.695727
'17-Jul-2017 11:45:00'	0.514538	1.4298	650.509	0.732886
'17-Jul-2017 12:15:00'	0.562307	1.6187	2120.76	0.591604
'17-Jul-2017 12:45:00'	0.590359	1.2836	1927.17	0.562472
'17-Jul-2017 13:15:00'	0.490203	1.15	868.989	0.637335
'17-Jul-2017 13:45:00'	0.561823	1.6375	1887.06	0.512642
'17-Jul-2017 14:15:00'	0.233756	0.72304	408.444	0.696823
'17-Jul-2017 14:45:00'	0.380563	1.3681	1984.07	0.609828
'17-Jul-2017 15:15:00'	0.687352	1.4984	701.536	0.611943
'17-Jul-2017 15:45:00'	0.54353	1.3656	1572.23	0.640633
'17-Jul-2017 16:15:00'	0.140706	0.77467	771.574	0.738815
'17-Jul-2017 16:45:00'	0.0727683	0.22835	238.704	0.751662
'17-Jul-2017 17:15:00'	0.0632751	0.19136	188.071	0.711319
'17-Jul-2017 17:45:00'	0.126305	0.13188	187.117	0.759542
'18-Jul-2017 09:15:00'	0.393915	1.3586	947.134	0.820553
'18-Jul-2017 09:45:00'	0.430741	1.386	1147.33	0.803062
'18-Jul-2017 10:15:00'	0.463608	1.4262	1337.91	0.826758
'18-Jul-2017 10:45:00'	0.569495	1.9683	1508.02	0.759404
'18-Jul-2017 11:15:00'	0.554652	1.5993	1780.91	0.690558
'18-Jul-2017 11:45:00'	0.524914	1.6818	579.987	0.715662
'18-Jul-2017 12:15:00'	0.47562	1.7372	513.84	0.742154
'18-Jul-2017 12:45:00'	0.378331	1.2196	2182.91	0.647044
'18-Jul-2017 13:15:00'	0.189262	0.87054	601.241	0.692629
'18-Jul-2017 13:45:00'	0.209304	0.81302	536.728	0.736193
'18-Jul-2017 14:15:00'	0.201799	NaN	371.699	0.770041
'18-Jul-2017 14:45:00'	0.308034	1.2408	517.595	0.756238
'18-Jul-2017 15:15:00'	0.386971	1.1163	831.444	0.729619
'18-Jul-2017 15:45:00'	0.447796	1.1445	622.045	0.772941
'18-Jul-2017 16:15:00'	0.291832	0.88195	488.042	0.778318
'18-Jul-2017 16:45:00'	0.210114	NaN	308.559	0.813349
'18-Jul-2017 17:15:00'	0.124493	NaN	184.528	0.870237
'18-Jul-2017 17:45:00'	0.0821221	0.88595	184.528	0.870237
'19-Jul-2017 09:15:00'	0.577815	1.3573	796.097	0.896623
'19-Jul-2017 09:45:00'	0.686039	1.6462	942.879	0.864137
'19-Jul-2017 10:15:00'	0.679513	1.8228	1079.52	0.866249
'19-Jul-2017 10:45:00'	0.659135	1.6642	1515.53	0.834516
'19-Jul-2017 11:15:00'	0.743021	1.8338	1635.43	0.792189
'19-Jul-2017 11:45:00'	0.732957	1.8269	1747.58	0.757157
'19-Jul-2017 12:15:00'	0.759754	1.7472	1846.23	0.725332
'19-Jul-2017 12:45:00'	0.726765	1.7649	1886.28	0.667138
'19-Jul-2017 13:15:00'	0.573065	1.576	1955.66	0.561766
'19-Jul-2017 13:45:00'	0.349524	0.86271	1749.72	0.674328
'19-Jul-2017 14:15:00'	0.721975	1.4276	1965.1	0.579595
'19-Jul-2017 14:45:00'	0.840752	1.8211	1867.39	0.604855
'19-Jul-2017 15:15:00'	0.745266	1.7257	1742.32	0.617179
'19-Jul-2017 15:45:00'	0.392535	1.1007	355.189	0.766409
'19-Jul-2017 16:15:00'	0.346782	1.3074	649.048	0.796073
'19-Jul-2017 16:45:00'	0.583093	1.6526	1258.06	0.800854
'19-Jul-2017 17:15:00'	0.51871	1.4594	1008.21	0.866174
'19-Jul-2017 17:45:00'	0.498349	1.0374	589.679	0.89986
'20-Jul-2017 09:15:00'	0.583913	1.1335	899.094	0.907003
'20-Jul-2017 09:45:00'	0.564857	1.5654	1123.24	0.890374
'20-Jul-2017 10:15:00'	0.629244	1.6011	1282.85	0.880303
'20-Jul-2017 10:45:00'	0.659459	1.8121	1436.29	0.827579
'20-Jul-2017 11:15:00'	0.694147	1.6738	1590.07	0.744724
'20-Jul-2017 11:45:00'	0.667276	1.6374	1541.61	0.697859
'20-Jul-2017 12:15:00'	0.599404	1.426	1656.8	0.667815
'20-Jul-2017 12:45:00'	0.632589	1.7896	1736.99	0.58795
'20-Jul-2017 13:15:00'	0.619915	1.5609	1860.89	0.556945
'20-Jul-2017 13:45:00'	0.81864	1.7588	1812.59	0.512634
'20-Jul-2017 14:15:00'	0.807403	1.4564	1601.08	0.524205
'20-Jul-2017 14:45:00'	0.523162	1.206	1441.06	0.659033
'20-Jul-2017 15:15:00'	0.611751	1.5397	1520.63	0.648337
'20-Jul-2017 15:45:00'	0.545196	1.4885	1062.49	0.688477
'20-Jul-2017 16:15:00'	0.589849	1.4309	1091.29	0.73199
'20-Jul-2017 16:45:00'	0.524296	1.3505	987.966	0.756573
'20-Jul-2017 17:15:00'	0.479811	1.3285	799.358	0.828621
'20-Jul-2017 17:45:00'	0.412015	1.144	704.227	0.866539
'21-Jul-2017 09:15:00'	0.521611	1.1588	898.43	0.928139
'21-Jul-2017 09:45:00'	0.654468	1.4327	1198.62	0.870501
'21-Jul-2017 10:15:00'	0.697378	1.3573	1341.15	0.864503
'21-Jul-2017 10:45:00'	0.660557	1.1288	1544.09	0.812906
'21-Jul-2017 11:15:00'	0.680223	1.4449	1740.04	0.746531
'21-Jul-2017 11:45:00'	0.707071	1.4817	1856.88	0.674674
'21-Jul-2017 12:15:00'	0.271763	1.0576	604.126	0.777339
'21-Jul-2017 12:45:00'	0.356744	1.4221	677.56	0.793373
'21-Jul-2017 13:15:00'	0.534553	1.5805	1773.9	0.55732
'21-Jul-2017 13:45:00'	0.805494	1.6302	1881.51	0.568872
'21-Jul-2017 14:15:00'	0.849806	1.6402	1363.82	0.574198
'21-Jul-2017 14:45:00'	0.527121	1.4621	721.404	0.643653
'21-Jul-2017 15:15:00'	0.80552	1.6244	1836.53	0.611286
'21-Jul-2017 15:45:00'	0.665195	1.27	1453.01	0.615816
'21-Jul-2017 16:15:00'	0.570204	1.3651	1235.45	0.67866
'21-Jul-2017 16:45:00'	0.57016	1.272	1221.73	0.755207
'21-Jul-2017 17:15:00'	0.355176	0.99617	803.374	0.780522
'21-Jul-2017 17:45:00'	0.287054	0.9328	524.717	0.845904
'22-Jul-2017 09:15:00'	0.417201	1.283	742.383	0.927379
'22-Jul-2017 09:45:00'	0.575285	1.5131	1009.66	0.883669
'22-Jul-2017 10:15:00'	0.555571	1.6116	1148.87	0.880785
'22-Jul-2017 10:45:00'	0.581192	1.7359	1584.89	0.832162
'22-Jul-2017 11:15:00'	0.625449	1.5861	1595.93	0.809338
'22-Jul-2017 11:45:00'	0.72035	1.5364	1580.66	0.701642
'22-Jul-2017 12:15:00'	0.667014	1.5751	1757.76	0.627328
'22-Jul-2017 12:45:00'	0.610275	1.3445	1900.76	0.555322
'22-Jul-2017 13:15:00'	0.659001	1.3295	2014.42	0.496083
'22-Jul-2017 13:45:00'	0.458004	1.1952	1054.92	0.598595
'22-Jul-2017 14:15:00'	0.562603	1.2761	2084.79	0.518095
'22-Jul-2017 14:45:00'	0.0159429	NaN	261.979	0.733877
'22-Jul-2017 16:15:00'	0.211477	0.37019	372.358	0.741207
'22-Jul-2017 16:45:00'	0.221684	0.37019	372.358	0.741207
'22-Jul-2017 17:15:00'	0.351445	0.53238	767.115	0.866499
'22-Jul-2017 17:45:00'	0.143443	0.25126	251.54	0.732275
'25-Jul-2017 09:15:00'	0.583428	1.0338	886.479	0.947868
'25-Jul-2017 09:45:00'	0.721242	1.0996	1085.05	0.902588
'25-Jul-2017 10:15:00'	0.742666	1.2166	1263.22	0.910083
'25-Jul-2017 10:45:00'	0.84627	1.2274	1432.49	0.898448
'25-Jul-2017 11:15:00'	0.669072	1.1865	1760.84	0.894302
'25-Jul-2017 11:45:00'	0.518695	1.0281	432.468	0.872343
'25-Jul-2017 12:15:00'	0.531896	1.1238	764.714	0.844176
'25-Jul-2017 12:45:00'	0.459337	0.98854	651.385	0.8688
'25-Jul-2017 13:15:00'	0.438281	1.3569	609.022	0.845715
'25-Jul-2017 13:45:00'	0.538734	1.1602	920.745	0.828969
'25-Jul-2017 14:15:00'	0.734971	1.6187	828.936	0.841022
'25-Jul-2017 14:45:00'	0.44329	1.2567	669.269	0.876053
'25-Jul-2017 15:15:00'	0.780075	1.5318	965.228	0.846347
'25-Jul-2017 15:45:00'	0.613109	1.1532	526.105	0.84685
'25-Jul-2017 16:15:00'	0.584922	1.4532	1484.85	0.916848
'25-Jul-2017 16:45:00'	0.486071	1.4701	506.625	0.903649
'25-Jul-2017 17:15:00'	0.413245	0.77055	406.224	0.874152
'25-Jul-2017 17:45:00'	0.249545	0.60288	278.416	0.906589
'26-Jul-2017 09:15:00'	0.370402	0.58067	590.539	0.927214
'26-Jul-2017 09:45:00'	0.560897	1.0825	661.539	0.92807
'26-Jul-2017 10:15:00'	0.954115	1.4797	1015.54	0.909787
'26-Jul-2017 10:45:00'	0.572019	1.059	1540.99	0.909869
'26-Jul-2017 11:15:00'	0.480236	1.0852	1761.8	0.886744
'26-Jul-2017 11:45:00'	0.58976	1.0025	524.827	0.859437
'26-Jul-2017 12:15:00'	0.907784	1.4638	1839.6	0.840742
'26-Jul-2017 12:45:00'	0.959159	1.5641	2010.32	0.84408
'26-Jul-2017 13:15:00'	0.286722	0.70532	354.656	0.892368
'26-Jul-2017 13:45:00'	0.529149	0.83944	446.476	0.889453
'26-Jul-2017 14:15:00'	1.40505	1.9865	1882.3	0.78795
'26-Jul-2017 14:45:00'	1.25026	1.657	1736.23	0.806097
'26-Jul-2017 15:15:00'	0.963536	1.4093	1659.97	0.828922
'26-Jul-2017 15:45:00'	0.845639	1.4066	1479.22	0.882448
'26-Jul-2017 16:15:00'	0.719878	1.4467	1297.36	0.921105
'26-Jul-2017 16:45:00'	0.602276	1.1375	1120.55	0.922343
'26-Jul-2017 17:15:00'	0.468506	0.99326	921.789	0.976149
'26-Jul-2017 17:45:00'	0.272549	0.69841	221.315	0.931968
'27-Jul-2017 09:15:00'	0.273505	0.86387	377.646	0.892621
'27-Jul-2017 09:45:00'	0.542941	1.71	1061.5	0.923853
'27-Jul-2017 10:15:00'	0.663177	1.8376	882.13	0.908556
'27-Jul-2017 10:45:00'	0.453135	1.7849	1254.04	0.900148
'27-Jul-2017 11:15:00'	0.894773	1.8351	967.693	0.8944
'27-Jul-2017 11:45:00'	0.673099	2.343	930.191	0.853445
'27-Jul-2017 12:15:00'	0.591554	1.7858	877.381	0.844648
'27-Jul-2017 12:45:00'	0.304407	1.4971	1121.71	0.857588
'27-Jul-2017 13:15:00'	0.318192	0.83756	385.81	0.855171
'27-Jul-2017 13:45:00'	0.350907	1.1299	521.397	0.873881
'27-Jul-2017 14:15:00'	0.51186	1.4397	819.793	0.862519
'27-Jul-2017 14:45:00'	0.803017	1.8698	1450.69	0.83796
'27-Jul-2017 15:15:00'	0.393682	1.1619	498.338	0.88202
'27-Jul-2017 15:45:00'	0.434996	1.184	560.388	0.872931
'27-Jul-2017 16:15:00'	0.616952	1.9005	1399.54	0.913563
'27-Jul-2017 16:45:00'	0.19975	1.0001	941.804	0.922441
'27-Jul-2017 17:15:00'	0.255482	0.61522	380.763	0.873577
'27-Jul-2017 17:45:00'	0.223997	0.6797	307.215	0.892102
'28-Jul-2017 09:15:00'	0.401021	NaN	514.78	0.893749
'28-Jul-2017 09:45:00'	0.273388	NaN	249.167	0.911834
'28-Jul-2017 10:15:00'	0.259564	NaN	358.308	0.897883
'09-Aug-2017 14:15:00'	1.05572	1.6818	1935.28	0.794458
'09-Aug-2017 14:45:00'	0.690856	1.0613	1387.58	0.819935
'09-Aug-2017 15:15:00'	0.762165	1.3942	1781.95	0.881579
'09-Aug-2017 15:45:00'	0.728127	1.5251	1650.93	0.895369
'09-Aug-2017 16:15:00'	0.624677	1.3472	1453.65	0.929567
'09-Aug-2017 16:45:00'	0.550344	1.2788	1279.16	0.975003
'09-Aug-2017 17:15:00'	0.489158	0.96733	1016.17	1.00507
'09-Aug-2017 17:45:00'	0.35616	0.72564	780.445	1.01763
'10-Aug-2017 09:15:00'	0.65124	1.1525	669.768	0.996577
'10-Aug-2017 09:45:00'	0.767412	1.3811	879.146	0.966505
'10-Aug-2017 10:15:00'	0.872307	1.4698	1048.6	0.932656
'10-Aug-2017 10:45:00'	0.90744	1.9623	1553.51	0.903164
'10-Aug-2017 11:15:00'	0.529167	1.1847	412.934	0.919051
'10-Aug-2017 11:45:00'	0.931574	1.8052	1942.2	0.870811
'10-Aug-2017 12:15:00'	0.575111	0.79644	462.188	0.877313
'10-Aug-2017 12:45:00'	0.807952	1.6861	588.674	0.870682
'10-Aug-2017 13:15:00'	1.18009	1.5906	2020.66	0.817313
'10-Aug-2017 13:45:00'	1.1565	1.7345	2125.39	0.816427
'10-Aug-2017 14:15:00'	0.847635	1.1623	2110.05	0.828319
'10-Aug-2017 14:45:00'	0.701069	1.2225	1839.32	0.834423
'10-Aug-2017 15:15:00'	0.784944	1.4636	1109.78	0.881667
'10-Aug-2017 15:45:00'	0.31648	0.80438	614.365	0.883562
'10-Aug-2017 16:15:00'	0.29248	0.71117	504.176	0.895342
'10-Aug-2017 16:45:00'	0.291221	0.69633	446.82	0.880739
'10-Aug-2017 17:15:00'	0.252235	0.53225	585.964	0.868632
'10-Aug-2017 17:45:00'	0.19061	0.53573	327.949	0.902678
'11-Aug-2017 09:15:00'	0.279872	0.56045	313.785	0.894632
'11-Aug-2017 09:45:00'	0.265303	0.64356	385.341	0.887102
'11-Aug-2017 10:15:00'	0.296345	0.52971	353.29	0.872969
'11-Aug-2017 10:45:00'	0.713103	1.611	1507.54	0.887381
'11-Aug-2017 11:15:00'	0.332675	0.8062	282.547	0.877446
'11-Aug-2017 11:45:00'	0.473207	1.3244	549.574	0.893063
'11-Aug-2017 12:15:00'	0.373749	0.96925	763.957	0.883727
'11-Aug-2017 12:45:00'	0.657315	1.6874	1120.17	0.874469
'11-Aug-2017 13:15:00'	0.582194	1.6239	1275.53	0.859663
'11-Aug-2017 13:45:00'	0.473	1.2746	897.754	0.876541
'11-Aug-2017 14:15:00'	0.326938	0.73357	411.188	0.87846
'11-Aug-2017 14:45:00'	0.134376	NaN	356.636	0.839459
'11-Aug-2017 15:15:00'	0.3324	NaN	621.737	0.853253
'11-Aug-2017 15:45:00'	0.766558	1.2635	873.055	0.842812
'11-Aug-2017 16:15:00'	0.536264	0.87761	596.295	0.885304
'11-Aug-2017 16:45:00'	0.131835	0.33433	184.482	0.906017
'11-Aug-2017 17:15:00'	0.101641	0.15754	230.407	0.86644
'11-Aug-2017 17:45:00'	0.0513737	-0.0015085	191.43	0.876781
'12-Aug-2017 09:15:00'	0.0891233	NaN	185.164	0.789966
'12-Aug-2017 09:45:00'	0.0959193	0.16203	204.89	0.82364
'12-Aug-2017 10:15:00'	0.379406	0.67075	397.641	0.810159
'12-Aug-2017 10:45:00'	0.599277	1.1648	620.076	0.851346
'12-Aug-2017 11:15:00'	1.00789	1.4846	518.02	0.870557
'12-Aug-2017 11:45:00'	0.766001	1.4582	830.329	0.86245
'12-Aug-2017 12:15:00'	0.676635	0.90068	447.178	0.881895
'12-Aug-2017 12:45:00'	0.433753	1.7274	1514.01	0.85338
'12-Aug-2017 13:15:00'	1.29282	1.5201	568.149	0.877927
'12-Aug-2017 13:45:00'	1.21518	1.6468	624.288	0.853776
'12-Aug-2017 14:15:00'	0.182855	1.0841	1711.34	0.813685
'12-Aug-2017 14:45:00'	0.371387	0.81021	758.201	0.854971
'12-Aug-2017 15:15:00'	0.654811	1.4057	896.227	0.867402
'12-Aug-2017 15:45:00'	0.332035	1.0488	445.235	0.894161
'12-Aug-2017 16:15:00'	0.309422	0.83802	473.469	0.863559
'12-Aug-2017 16:45:00'	0.334943	0.87258	560.068	0.877639
'12-Aug-2017 17:15:00'	0.440081	0.88262	387.618	0.918864
'12-Aug-2017 17:45:00'	0.338208	0.7456	664.797	0.949552
'13-Aug-2017 09:15:00'	0.775911	1.0721	791.435	0.936588
'13-Aug-2017 09:45:00'	0.92752	1.3654	1004.42	0.93014
'13-Aug-2017 10:15:00'	0.904193	1.2641	1098.12	0.901935
'13-Aug-2017 10:45:00'	1.21376	1.2936	1077.48	0.888857
'13-Aug-2017 11:15:00'	1.22765	1.1423	1241.62	0.867781
'13-Aug-2017 11:45:00'	1.2183	1.4723	1386.47	0.882695
'13-Aug-2017 12:15:00'	1.36628	1.3372	1374.52	0.865601
'13-Aug-2017 12:45:00'	1.28409	1.5256	1630.35	0.834415
'13-Aug-2017 13:15:00'	0.844507	0.97912	442.033	0.862916
'13-Aug-2017 13:45:00'	1.10419	1.7607	2058.51	0.801231
'13-Aug-2017 14:15:00'	0.782963	1.4	870.869	0.851922
'13-Aug-2017 14:45:00'	0.816695	1.2657	1658.91	0.850269
'13-Aug-2017 15:15:00'	0.286955	1.7779	1891.59	0.874908
'13-Aug-2017 15:45:00'	0.907832	1.7007	1685.55	0.893217
'13-Aug-2017 16:15:00'	0.564004	1.1131	1579.73	0.917504
'13-Aug-2017 16:45:00'	0.523064	0.84386	1251.89	0.961076
'13-Aug-2017 17:15:00'	0.550155	0.74752	989.981	0.963682
'13-Aug-2017 17:45:00'	0.416686	0.58112	742.249	1.00331
'14-Aug-2017 09:15:00'	0.304551	0.42347	389.097	0.847505
'14-Aug-2017 09:45:00'	0.285244	0.29945	362.785	0.846503
'14-Aug-2017 10:15:00'	0.130909	0.21385	230.646	0.854819
'14-Aug-2017 10:45:00'	0.300171	0.35596	355.462	0.883325
'14-Aug-2017 11:15:00'	0.346226	0.66309	396.561	0.863844
'14-Aug-2017 11:45:00'	0.401559	0.70841	629.764	0.87062
'14-Aug-2017 12:15:00'	0.335698	0.91323	447.658	0.862557
'14-Aug-2017 12:45:00'	0.212488	0.42538	323.039	0.87472
'14-Aug-2017 13:15:00'	0.244794	0.57665	454.346	0.879755
'14-Aug-2017 13:45:00'	0.338146	0.53247	510.784	0.866274
'14-Aug-2017 14:15:00'	0.269215	0.55831	400.937	0.883655
'14-Aug-2017 14:45:00'	0.246729	0.34415	320.947	0.882293
'14-Aug-2017 15:15:00'	0.230906	0.36313	351.979	0.883844
'14-Aug-2017 15:45:00'	0.248076	0.48148	357.825	0.877609
'14-Aug-2017 16:15:00'	0.202065	0.39211	405.418	0.867679
'14-Aug-2017 16:45:00'	0.157933	0.26328	229.48	0.876092
'14-Aug-2017 17:15:00'	0.164706	0.35062	260.606	0.873985
'14-Aug-2017 17:45:00'	0.128427	0.12389	222.877	0.885548
'15-Aug-2017 09:15:00'	0.124656	NaN	186.311	0.898724
'15-Aug-2017 09:45:00'	0.119988	NaN	186.311	0.898724
'15-Aug-2017 10:15:00'	0.173947	NaN	241.589	0.904248
'15-Aug-2017 10:45:00'	0.141105	NaN	237.85	0.902023
'15-Aug-2017 11:15:00'	0.064869	NaN	198.996	0.89273
'15-Aug-2017 11:45:00'	0.0915238	NaN	217.029	0.869074
'15-Aug-2017 12:15:00'	0.120196	NaN	217.029	0.869074
'15-Aug-2017 12:45:00'	0.180242	NaN	330.502	0.858842
'15-Aug-2017 13:15:00'	0.121289	NaN	192.196	0.863526
'15-Aug-2017 13:45:00'	0.336144	NaN	301.992	0.794626
'15-Aug-2017 14:15:00'	0.284075	1.0235	434.291	0.782641
'15-Aug-2017 14:45:00'	0.533106	1.1856	629.949	0.789318
'15-Aug-2017 15:15:00'	0.465421	0.98899	671.629	0.83453
'15-Aug-2017 15:45:00'	0.332652	0.53815	335.003	0.857334
'15-Aug-2017 16:15:00'	0.47614	0.90824	737.977	0.871357
'15-Aug-2017 16:45:00'	0.166394	0.37209	217.397	0.874924
'15-Aug-2017 17:15:00'	0.190945	0.35813	252.124	0.868643
'15-Aug-2017 17:45:00'	0.25329	0.36505	185.639	0.902081
'16-Aug-2017 09:15:00'	0.523964	0.876	473.389	0.930656
'16-Aug-2017 09:45:00'	0.652925	1.5376	879.903	0.932828
'16-Aug-2017 10:15:00'	0.699525	1.557	677.236	0.92119
'16-Aug-2017 10:45:00'	0.758795	1.6757	902.945	0.888017
'16-Aug-2017 11:15:00'	1.02859	2.1535	1311.13	0.872933
'16-Aug-2017 11:45:00'	0.935822	1.6602	1556.91	0.86821
'16-Aug-2017 12:15:00'	0.992251	1.9632	1777.31	0.862023
'16-Aug-2017 12:45:00'	0.760102	1.627	1686.69	0.817081
'16-Aug-2017 13:15:00'	1.01351	1.7561	1915.9	0.780912
'16-Aug-2017 13:45:00'	0.977325	1.2912	1989.87	0.796653
'16-Aug-2017 14:15:00'	1.12713	1.5135	1863.06	0.805292
'16-Aug-2017 14:45:00'	0.929203	1.5348	1923.09	0.825497
'16-Aug-2017 15:15:00'	0.97829	1.4654	1888.38	0.860988
'16-Aug-2017 15:45:00'	0.45622	1.0514	483.544	0.862967
'16-Aug-2017 16:15:00'	0.50529	1.2145	1481.44	0.907294
'16-Aug-2017 16:45:00'	0.504894	1.1073	1157.06	0.944701
'16-Aug-2017 17:15:00'	0.502907	1.035	944.186	0.936624
'16-Aug-2017 17:45:00'	0.405844	0.78468	714.138	0.991122
'17-Aug-2017 09:15:00'	0.487295	0.67721	635.932	0.927287
'17-Aug-2017 09:45:00'	0.564809	1.1383	970.203	0.926117
'17-Aug-2017 10:15:00'	0.655925	1.1825	1208.98	0.89929
'17-Aug-2017 10:45:00'	0.836062	1.6774	1384.42	0.882204
'17-Aug-2017 11:15:00'	0.578166	1.2956	1590.53	0.869133
'17-Aug-2017 11:45:00'	0.558037	1.5511	1077.35	0.852934
'17-Aug-2017 12:15:00'	0.716765	1.8575	723.611	0.8698
'17-Aug-2017 12:45:00'	0.99815	1.5078	1794.74	0.825326
'17-Aug-2017 13:15:00'	0.857279	1.672	2041.29	0.79595
'17-Aug-2017 13:45:00'	0.604076	1.3346	466.774	0.861124
'17-Aug-2017 14:15:00'	0.447415	1.1095	1203.04	0.847368
'17-Aug-2017 14:45:00'	0.462528	0.93939	364.857	0.873342
'17-Aug-2017 15:15:00'	0.602144	0.88167	1971.67	0.842554
'17-Aug-2017 15:45:00'	0.522473	0.85975	249.41	0.889391
'17-Aug-2017 16:15:00'	0.313282	0.52504	1306.7	0.897701
'17-Aug-2017 16:45:00'	0.164338	0.35254	275.662	0.872535
'17-Aug-2017 17:15:00'	0.177912	0.37063	264.566	0.851689
'17-Aug-2017 17:45:00'	0.413038	0.88152	860.19	0.917018
'18-Aug-2017 09:15:00'	0.319021	0.56011	471.107	0.863259
'18-Aug-2017 09:45:00'	0.405903	1.0002	570.053	0.863948
'18-Aug-2017 10:15:00'	0.4225	1.016	754.621	0.846014
'18-Aug-2017 10:45:00'	0.409524	1.5382	1403.55	0.854557
'18-Aug-2017 11:15:00'	0.915079	1.8569	1708.25	0.860308
'18-Aug-2017 11:45:00'	0.909241	1.8436	1913.33	0.862551
'18-Aug-2017 12:15:00'	0.951818	1.9041	1874.63	0.8541
'18-Aug-2017 12:45:00'	0.93626	1.7262	1880.33	0.809263
'18-Aug-2017 13:15:00'	0.966852	1.5004	1886.4	0.778569
'18-Aug-2017 13:45:00'	1.03799	1.7695	1923.03	0.779934
'18-Aug-2017 14:15:00'	0.990529	1.6818	1854.15	0.816636
'18-Aug-2017 14:45:00'	0.82674	1.7827	1807.45	0.8099
'18-Aug-2017 15:15:00'	0.691169	1.4036	1927.12	0.844672
'18-Aug-2017 15:45:00'	0.691912	1.4072	1748.33	0.869785
'18-Aug-2017 16:15:00'	0.353483	0.84079	643.873	0.874415
'18-Aug-2017 16:45:00'	0.220831	1.0915	1089.17	0.898074
'18-Aug-2017 17:15:00'	0.502997	1.128	466.257	0.856692
'18-Aug-2017 17:45:00'	0.059667	NaN	245.486	0.828266
'19-Aug-2017 09:15:00'	0.752599	1.0135	638.73	0.957112
'19-Aug-2017 09:45:00'	1.01849	1.2043	764.624	0.889915
'19-Aug-2017 10:15:00'	0.985557	1.352	958.376	0.904964
'19-Aug-2017 10:45:00'	1.13411	1.3993	1101.32	0.884734
'19-Aug-2017 11:15:00'	1.15738	1.4727	1343.34	0.887909
'19-Aug-2017 11:45:00'	1.25942	1.5383	1332.71	0.886066
'19-Aug-2017 12:15:00'	1.39407	1.5702	1296.6	0.850066
'19-Aug-2017 12:45:00'	1.11933	1.6035	1525.16	0.85758
'19-Aug-2017 13:15:00'	0.902882	1.6926	1885.56	0.82291
'19-Aug-2017 13:45:00'	0.436266	1.1749	495.424	0.878283
'19-Aug-2017 14:15:00'	0.327264	1.8092	1062.11	0.846649
'19-Aug-2017 14:45:00'	0.995385	1.6755	1759.21	0.84418
'19-Aug-2017 15:15:00'	0.915225	1.7447	1645.79	0.875594
'19-Aug-2017 15:45:00'	0.802965	1.4862	1450.41	0.898102
'19-Aug-2017 16:15:00'	0.706705	1.3543	1290.19	0.924139
'19-Aug-2017 16:45:00'	0.620592	1.2842	1092.73	0.941146
'19-Aug-2017 17:15:00'	0.526	0.93948	889.163	0.94255
'19-Aug-2017 17:45:00'	0.437614	0.85389	665.647	0.966674
'20-Aug-2017 09:15:00'	0.850131	0.80557	682.681	0.936093
'20-Aug-2017 09:45:00'	0.904173	0.96124	843.228	0.915734
'20-Aug-2017 10:15:00'	0.969782	1.0462	1039.19	0.892807
'20-Aug-2017 10:45:00'	0.902576	1.2244	1373.36	0.882106
'20-Aug-2017 11:15:00'	1.08559	1.3982	1499.14	0.870033
'20-Aug-2017 11:45:00'	1.05446	1.416	1628.99	0.867536
'20-Aug-2017 12:15:00'	1.03099	1.3782	1726.45	0.839621
'20-Aug-2017 12:45:00'	1.03355	1.4865	1802.64	0.841685
'20-Aug-2017 13:15:00'	0.952771	1.3174	1829.07	0.81575
'20-Aug-2017 13:45:00'	1.12518	1.2471	1825.67	0.808211
'20-Aug-2017 14:15:00'	1.21772	1.6204	1782.24	0.841603
'20-Aug-2017 14:45:00'	1.05829	1.4613	1718.06	0.826966
'20-Aug-2017 15:15:00'	1.0038	1.2773	1601.02	0.851991
'20-Aug-2017 15:45:00'	0.84138	1.2551	1456.23	0.897196
'20-Aug-2017 16:15:00'	0.681544	1.2715	1295.7	0.924796
'20-Aug-2017 16:45:00'	0.678656	0.94513	1099.88	0.936523
'20-Aug-2017 17:15:00'	0.542549	0.79484	893.118	0.947326
'20-Aug-2017 17:45:00'	0.466145	0.50736	660.196	0.949168
'21-Aug-2017 09:15:00'	0.597058	0.6346	581.563	0.935062
'21-Aug-2017 09:45:00'	0.696049	1.1494	886.95	0.910378
'21-Aug-2017 10:15:00'	0.738243	1.6599	1133.46	0.877379
'21-Aug-2017 10:45:00'	0.722254	1.3868	1347.18	0.850553
'21-Aug-2017 11:15:00'	0.991533	1.5722	1530.56	0.848579
'21-Aug-2017 11:45:00'	0.777628	1.6045	1732.27	0.856198
'21-Aug-2017 12:15:00'	0.910633	1.6921	1684.12	0.840524
'21-Aug-2017 12:45:00'	0.905625	1.9365	1660.17	0.839294
'21-Aug-2017 13:15:00'	0.4674	1.4701	567.801	0.862448
'21-Aug-2017 13:45:00'	0.669804	1.7037	1616.79	0.800689
'21-Aug-2017 14:15:00'	0.411279	0.89858	834.101	0.827653
'21-Aug-2017 14:45:00'	0.171765	0.36924	263.981	0.834037
'21-Aug-2017 15:15:00'	0.41807	0.8789	697.358	0.851884
'21-Aug-2017 15:45:00'	0.488362	1.2066	1281	0.880118
'21-Aug-2017 16:15:00'	0.203133	0.98512	1079.77	0.888712
'21-Aug-2017 16:45:00'	0.373471	1.1043	663.392	0.85067
'21-Aug-2017 17:15:00'	0.137096	0.29415	204.542	0.871948
'21-Aug-2017 17:45:00'	0.355202	0.57853	740.032	0.896332
'22-Aug-2017 09:15:00'	0.617724	1.1732	723.463	0.920731
'22-Aug-2017 09:45:00'	0.674962	1.2385	913.006	0.875798
'22-Aug-2017 10:15:00'	0.73388	1.4603	1112.27	0.867333
'22-Aug-2017 10:45:00'	0.859233	1.8015	1264.52	0.840493
'22-Aug-2017 11:15:00'	0.912237	1.66	1399.59	0.825862
'22-Aug-2017 11:45:00'	0.910957	1.4648	1573.86	0.843651
'22-Aug-2017 12:15:00'	0.824126	1.7807	1658.4	0.830507
'22-Aug-2017 12:45:00'	0.789302	1.8268	1714.62	0.824745
'22-Aug-2017 13:15:00'	0.84891	1.6232	1746.36	0.778113
'22-Aug-2017 13:45:00'	0.887069	1.55	1723.33	0.790853
'22-Aug-2017 14:15:00'	0.922167	1.8091	1715.85	0.808903
'22-Aug-2017 14:45:00'	0.890006	1.6791	1611.88	0.806768
'22-Aug-2017 15:15:00'	0.893121	1.669	1529	0.800994
'22-Aug-2017 15:45:00'	0.760365	1.4246	1385.57	0.864405
'22-Aug-2017 16:15:00'	0.628957	1.2948	1239.09	0.875166
'22-Aug-2017 16:45:00'	0.554536	1.1531	1040.68	0.90203
'22-Aug-2017 17:15:00'	0.500382	0.9303	833.252	0.916657
'22-Aug-2017 17:45:00'	0.4163	0.68855	612.195	0.91565
'23-Aug-2017 09:15:00'	0.180089	0.29384	225.688	0.828032
'23-Aug-2017 09:45:00'	0.181019	0.34744	356.734	0.837889
'23-Aug-2017 10:15:00'	0.418269	0.93859	657.097	0.834431
'23-Aug-2017 10:45:00'	0.378908	0.88746	725.111	0.820886
'23-Aug-2017 11:15:00'	0.515993	1.3266	776.218	0.827804
'23-Aug-2017 11:45:00'	0.543698	1.2681	996.118	0.836313
'23-Aug-2017 12:15:00'	0.443602	1.2751	1503.55	0.837935
'23-Aug-2017 12:45:00'	0.58558	1.4048	1084.14	0.817107
'23-Aug-2017 13:15:00'	0.583317	1.3823	954.444	0.814221
'23-Aug-2017 13:45:00'	0.564772	1.4188	1160.29	0.810121
'23-Aug-2017 14:15:00'	0.725156	1.2318	1576.33	0.804841
'23-Aug-2017 14:45:00'	0.281477	0.64296	874.097	0.807825
'23-Aug-2017 15:15:00'	0.776908	1.5216	1629.97	0.81882
'23-Aug-2017 15:45:00'	0.706176	1.0782	1479.34	0.847313
'23-Aug-2017 16:15:00'	0.683506	1.1708	1364.49	0.893749
'23-Aug-2017 16:45:00'	0.573425	1.003	1079.84	0.917461
'23-Aug-2017 17:15:00'	0.513556	0.82132	868.275	0.917332
'23-Aug-2017 17:45:00'	0.457315	0.51737	610.629	0.93668
'24-Aug-2017 09:15:00'	0.353563	0.45702	432.735	0.846057
'24-Aug-2017 09:45:00'	0.265296	0.61264	1254.56	0.866564
'24-Aug-2017 10:15:00'	0.487014	0.88446	1600.79	0.846435
'24-Aug-2017 10:45:00'	0.804952	1.0814	1479.21	0.85202
'24-Aug-2017 11:15:00'	0.792106	1.0944	852.13	0.817716
'24-Aug-2017 11:45:00'	0.495537	1.2203	1128.11	0.842578
'24-Aug-2017 12:15:00'	0.794377	1.218	1830.54	0.827506
'24-Aug-2017 12:45:00'	0.715848	1.1566	1712.15	0.829769
'24-Aug-2017 13:15:00'	0.983141	1.1971	2160.83	0.760165
'24-Aug-2017 13:45:00'	0.678341	1.3416	900.609	0.817943
'24-Aug-2017 14:15:00'	0.7571	1.2209	1766.22	0.791803
'24-Aug-2017 14:45:00'	0.457123	1.2776	777.989	0.791193
'24-Aug-2017 15:15:00'	0.908298	1.4364	1522.8	0.814702
'24-Aug-2017 15:45:00'	0.323719	0.98825	701.602	0.81825
'24-Aug-2017 16:15:00'	0.542174	0.97662	1292.91	0.885937
'24-Aug-2017 16:45:00'	0.606349	0.95182	1031.82	0.899452
'24-Aug-2017 17:15:00'	0.631781	0.71853	637.855	0.909925
'24-Aug-2017 17:45:00'	0.42535	0.43519	497.741	0.908177
'25-Aug-2017 09:15:00'	0.34291	0.51513	311.297	0.892151
'25-Aug-2017 09:45:00'	0.562439	0.68752	634.516	0.874995
'25-Aug-2017 10:15:00'	0.991551	0.92574	809.552	0.85921
'25-Aug-2017 10:45:00'	1.08078	1.093	940.065	0.840548
'25-Aug-2017 11:15:00'	1.02836	1.3523	1042.75	0.826701
'25-Aug-2017 11:45:00'	1.13961	1.3128	1181.04	0.835309
'25-Aug-2017 12:15:00'	0.825354	1.3085	546.725	0.819755
'25-Aug-2017 12:45:00'	0.801637	1.3422	1445.79	0.82357
'25-Aug-2017 13:15:00'	0.832497	1.3948	1677.52	0.763699
'25-Aug-2017 13:45:00'	0.836566	1.3559	1742.99	0.757696
'25-Aug-2017 14:15:00'	0.84303	1.1282	1719.27	0.792308
'25-Aug-2017 14:45:00'	0.890351	1.1539	1702.66	0.774817
'25-Aug-2017 15:15:00'	0.55284	0.94652	1656.14	0.805562
'25-Aug-2017 15:45:00'	0.422112	1.0857	470.845	0.821438
'25-Aug-2017 16:15:00'	0.538002	1.2454	1303.62	0.868855
'25-Aug-2017 16:45:00'	0.464185	0.71978	1080.4	0.877632
'25-Aug-2017 17:15:00'	0.546007	0.81442	936.858	0.878748
'25-Aug-2017 17:45:00'	0.442381	0.54005	640.275	0.891013
'26-Aug-2017 09:15:00'	0.607053	0.52643	629.424	0.873368
'26-Aug-2017 09:45:00'	0.667929	0.84904	879.867	0.871965
'26-Aug-2017 10:15:00'	0.677092	0.82483	1130.13	0.829783
'26-Aug-2017 10:45:00'	0.729475	0.8555	1297.05	0.828243
'26-Aug-2017 11:15:00'	0.275495	0.8559	1572.1	0.795394
'26-Aug-2017 11:45:00'	0.837385	1.0145	1462.08	0.813306
'26-Aug-2017 12:15:00'	0.699089	0.99256	1633.04	0.802092
'26-Aug-2017 12:45:00'	0.407289	1.244	1764.78	0.773581
'26-Aug-2017 13:15:00'	0.751675	0.91706	1760.06	0.741092
'26-Aug-2017 13:45:00'	0.638707	0.92007	1750.56	0.737363
'26-Aug-2017 14:15:00'	0.323033	0.86912	673.121	0.75684
'26-Aug-2017 14:45:00'	0.680733	0.94804	1688.41	0.758646
'26-Aug-2017 15:15:00'	0.692035	1.1532	1591.3	0.79733
'26-Aug-2017 15:45:00'	0.365166	0.82221	582.988	0.771297
'26-Aug-2017 16:15:00'	0.521741	0.88141	1179.46	0.847339
'26-Aug-2017 16:45:00'	0.566413	0.84732	998.101	0.853028
'26-Aug-2017 17:15:00'	0.403832	0.59384	801.333	0.852032
'26-Aug-2017 17:45:00'	0.322796	0.43346	517.552	0.861809
'27-Aug-2017 09:15:00'	0.552819	0.41464	669.591	0.853971
'27-Aug-2017 09:45:00'	0.351464	0.55251	351.899	0.813762
'27-Aug-2017 10:15:00'	0.807681	0.79028	1068.44	0.803882
'27-Aug-2017 10:45:00'	0.82145	0.95178	1071.02	0.798073
'27-Aug-2017 11:15:00'	0.784635	1.1322	1396.01	0.778792
'27-Aug-2017 11:45:00'	0.725	1.0883	1517.05	0.779322
'27-Aug-2017 12:15:00'	0.689485	1.0353	1552.37	0.781485
'27-Aug-2017 12:45:00'	0.529677	1.1621	1505.94	0.766391
'27-Aug-2017 13:15:00'	0.569905	1.2238	1502.27	0.737553
'27-Aug-2017 13:45:00'	0.557197	1.1912	1366.07	0.744175
'27-Aug-2017 14:15:00'	0.574657	1.0272	1481.8	0.747124
'27-Aug-2017 14:45:00'	0.517685	0.9516	1498.09	0.755627
'27-Aug-2017 15:15:00'	0.371372	0.98894	662.206	0.783137
'27-Aug-2017 15:45:00'	0.318764	0.7894	626.931	0.788472
'27-Aug-2017 16:15:00'	0.3824	0.73031	982.814	0.812344
'27-Aug-2017 16:45:00'	0.444547	0.68784	628.991	0.795366
'27-Aug-2017 17:15:00'	0.327861	0.56845	574.242	0.841241
'27-Aug-2017 17:45:00'	0.33562	0.52403	565.444	0.823655
'28-Aug-2017 09:15:00'	0.434564	0.45692	567.195	0.851317
'28-Aug-2017 09:45:00'	0.497393	0.55208	696.478	0.823971
'28-Aug-2017 10:15:00'	0.505003	0.84501	730.093	0.80012
'28-Aug-2017 10:45:00'	0.553761	0.90661	910.841	0.781491
'28-Aug-2017 11:15:00'	0.657106	1.0112	1078.76	0.794493
'28-Aug-2017 11:45:00'	0.488608	0.91075	1130.64	0.780973
'28-Aug-2017 12:15:00'	0.669931	1.149	1634.15	0.782154
'28-Aug-2017 12:45:00'	0.423929	1.1384	1685.09	0.775777
'28-Aug-2017 13:15:00'	0.430257	0.8801	1872.65	0.715731
'28-Aug-2017 13:45:00'	0.562934	1.2026	1594.58	0.706412
'28-Aug-2017 14:15:00'	0.481394	0.78761	532.272	0.792166
'28-Aug-2017 14:45:00'	0.702066	0.89677	1375.75	0.732948
'28-Aug-2017 15:15:00'	0.341134	0.60069	451.458	0.78386
'28-Aug-2017 15:45:00'	0.345566	0.89993	1121.19	0.784672
'28-Aug-2017 16:15:00'	0.357184	0.80937	580.578	0.777275
'28-Aug-2017 16:45:00'	0.318807	0.67303	633.005	0.806594
'28-Aug-2017 17:15:00'	0.332946	0.63555	557.961	0.741513
'28-Aug-2017 17:45:00'	0.286194	0.52942	540.443	0.770197
'29-Aug-2017 09:15:00'	0.0809152	NaN	208.93	0.683353
'29-Aug-2017 09:45:00'	0.125302	NaN	208.93	0.683353
'29-Aug-2017 10:15:00'	0.17674	NaN	211.712	0.801953
'29-Aug-2017 10:45:00'	0.0658818	NaN	186.486	0.695917
'29-Aug-2017 11:15:00'	0.0651639	NaN	186.486	0.695917
'29-Aug-2017 11:45:00'	0.0835415	NaN	203.735	0.605151
'29-Aug-2017 12:15:00'	0.109751	NaN	200.609	0.80917
'29-Aug-2017 12:45:00'	0.0880208	NaN	200.722	0.798851
'29-Aug-2017 13:15:00'	0.0782032	NaN	196.84	0.571166
'29-Aug-2017 13:45:00'	0.117462	NaN	247.117	0.755597
'29-Aug-2017 14:15:00'	0.0709892	NaN	208.6	0.538167
'29-Aug-2017 14:45:00'	0.0772565	NaN	198.267	0.776495
'29-Aug-2017 15:15:00'	0.0793458	NaN	193.025	0.650698
'29-Aug-2017 15:45:00'	0.0703705	NaN	197.431	0.755686
'29-Aug-2017 16:15:00'	0.0582296	NaN	192.212	0.774354
'29-Aug-2017 16:45:00'	0.0762017	NaN	184.317	0.741228
'29-Aug-2017 17:15:00'	0.0615937	NaN	184.317	0.741228
'30-Aug-2017 09:15:00'	0.554388	0.59502	603.525	0.85155
'30-Aug-2017 09:45:00'	0.598736	0.71222	731.077	0.835257
'30-Aug-2017 10:15:00'	0.784301	0.8145	990.318	0.792146
'30-Aug-2017 10:45:00'	0.878668	0.99148	998.473	0.78341
'30-Aug-2017 11:15:00'	0.932261	1.1725	1119.17	0.755895
'30-Aug-2017 11:45:00'	0.696064	1.1213	1252.76	0.76867
'30-Aug-2017 12:15:00'	0.703896	1.2049	1268.35	0.758586
'30-Aug-2017 12:45:00'	0.904632	1.1443	1295.83	0.74778
'30-Aug-2017 13:15:00'	0.44061	0.88536	1631.95	0.682997
'30-Aug-2017 13:45:00'	0.572987	1.2605	1947.01	0.675757
'30-Aug-2017 14:15:00'	0.278564	0.75989	514.189	0.754606
'30-Aug-2017 14:45:00'	0.282172	0.74041	532.538	0.73494
'30-Aug-2017 15:15:00'	0.405534	0.79139	1400.43	0.753602
'30-Aug-2017 15:45:00'	0.403035	0.97746	803.562	0.744313
'30-Aug-2017 16:15:00'	0.354119	0.79052	542.289	0.752196
'30-Aug-2017 16:45:00'	0.402115	0.7754	1142.72	0.805745
'30-Aug-2017 17:15:00'	0.288017	0.6857	591.87	0.807283
'30-Aug-2017 17:45:00'	0.174774	0.43405	375.828	0.801858
'31-Aug-2017 09:15:00'	0.507634	0.53223	685.209	0.818586
'31-Aug-2017 09:45:00'	0.450866	1.0002	923.466	0.784102
'31-Aug-2017 10:15:00'	0.544534	1.176	1132.51	0.764053
'31-Aug-2017 10:45:00'	0.573711	0.95912	1143.8	0.760014
'31-Aug-2017 11:15:00'	0.521851	1.3044	1321.57	0.740058
'31-Aug-2017 11:45:00'	0.498319	1.3642	1394.69	0.756827
'31-Aug-2017 12:15:00'	0.44649	1.2904	1476.49	0.72493
'31-Aug-2017 12:45:00'	0.28992	1.1256	1698.51	0.69763
'31-Aug-2017 13:15:00'	0.53205	1.3203	1775.98	0.64478
'31-Aug-2017 13:45:00'	0.509574	1.0127	1636.15	0.618164
'31-Aug-2017 14:15:00'	0.535605	1.3217	1700.75	0.674944
'31-Aug-2017 14:45:00'	0.340492	0.88298	1825.54	0.71115
'31-Aug-2017 15:15:00'	0.294967	0.97666	796.011	0.719245
'31-Aug-2017 15:45:00'	0.27661	1.1773	688.745	0.729021
'31-Aug-2017 16:15:00'	0.449431	0.89194	1160.79	0.771041
'31-Aug-2017 16:45:00'	0.220766	0.64984	470.847	0.736013
'31-Aug-2017 17:15:00'	0.449638	0.68301	567.711	0.761196
'31-Aug-2017 17:45:00'	0.212267	0.42073	258.692	0.796543
'01-Sep-2017 09:15:00'	0.288266	0.42396	409.285	0.728659
'01-Sep-2017 09:45:00'	0.209764	0.5186	556.351	0.707231
'01-Sep-2017 10:15:00'	0.235236	0.41179	483.817	0.685005
'01-Sep-2017 10:45:00'	0.323303	0.58051	752.06	0.717065
'01-Sep-2017 11:15:00'	0.250112	0.48541	479.581	0.694096
'01-Sep-2017 11:45:00'	0.202852	0.38821	445.319	0.679832
'01-Sep-2017 12:15:00'	0.197228	0.45304	478.658	0.676036
'01-Sep-2017 12:45:00'	0.211036	0.43302	395.668	0.683753
'01-Sep-2017 13:15:00'	0.251447	0.48097	700.226	0.686781
'01-Sep-2017 13:45:00'	0.286137	0.55468	622.321	0.678026
'01-Sep-2017 14:15:00'	0.307558	0.60238	824.404	0.656732
'01-Sep-2017 14:45:00'	0.234582	0.50367	607.94	0.678577
'01-Sep-2017 15:15:00'	0.271353	0.45767	546.177	0.671512
'01-Sep-2017 15:45:00'	0.280294	0.60328	612.223	0.701227
'01-Sep-2017 16:15:00'	0.168251	0.36375	341.269	0.684862
'01-Sep-2017 16:45:00'	0.179197	0.39456	423.936	0.69282
'01-Sep-2017 17:15:00'	0.128647	0.40071	366.745	0.687205
'01-Sep-2017 17:45:00'	0.14565	0.25463	346.778	0.690634
'02-Sep-2017 09:45:00'	0.0682816	NaN	195.335	0.717574
'02-Sep-2017 10:15:00'	0.0990632	NaN	195.335	0.717574
'02-Sep-2017 10:45:00'	0.14807	NaN	290.845	0.64412
'02-Sep-2017 11:15:00'	0.132556	NaN	255.277	0.732365
'02-Sep-2017 11:45:00'	0.139565	NaN	258.952	0.722429
'02-Sep-2017 12:15:00'	0.127276	NaN	267.025	0.721177
'02-Sep-2017 12:45:00'	0.242263	NaN	308.837	0.702552
'02-Sep-2017 13:15:00'	0.0648295	NaN	209.137	0.620476
'02-Sep-2017 13:45:00'	0.116108	NaN	193.687	0.58502
'02-Sep-2017 14:15:00'	0.129871	NaN	204.619	0.578147
'02-Sep-2017 14:45:00'	0.0621251	NaN	198.434	0.495497
'02-Sep-2017 15:15:00'	0.0786284	NaN	197.852	0.484281
'02-Sep-2017 15:45:00'	0.133423	NaN	187.466	0.691069
'02-Sep-2017 16:15:00'	0.129682	NaN	202.926	0.68622
'02-Sep-2017 16:45:00'	0.164893	NaN	210.485	0.627923
'02-Sep-2017 17:15:00'	0.109561	0.85405	223.825	0.62726
'02-Sep-2017 17:45:00'	0.0552198	0.22063	208.98	0.654275
'03-Sep-2017 09:15:00'	0.236403	0.59716	386.816	0.687673
'03-Sep-2017 09:45:00'	0.275795	0.57663	421.153	0.679639
'03-Sep-2017 10:15:00'	0.334515	0.91883	594.24	0.707691
'03-Sep-2017 10:45:00'	0.29387	0.77969	531.387	0.700913
'03-Sep-2017 11:15:00'	0.380109	1.1443	597.782	0.686009
'03-Sep-2017 11:45:00'	0.396397	1.0734	611.524	0.690076
'03-Sep-2017 12:15:00'	0.583043	1.5323	799.989	0.654422
'03-Sep-2017 12:45:00'	0.598581	1.1459	1392.29	0.665652
'03-Sep-2017 13:15:00'	0.454721	0.95143	1468.67	0.598802
'03-Sep-2017 13:45:00'	0.279718	1.0592	688.055	0.615651
'03-Sep-2017 14:15:00'	0.547986	1.1343	1334.45	0.61696
'03-Sep-2017 14:45:00'	0.47182	0.9943	411.972	0.667393
'03-Sep-2017 15:15:00'	0.516774	1.0215	1093.76	0.655966
'03-Sep-2017 15:45:00'	0.370271	0.72773	1263.76	0.693393
'03-Sep-2017 16:15:00'	0.407929	0.84821	1215.55	0.704417
'03-Sep-2017 16:45:00'	0.363299	0.70442	937.841	0.752923
'03-Sep-2017 17:15:00'	0.138472	0.45786	342.63	0.746194
'03-Sep-2017 17:45:00'	0.240687	0.37616	498.854	0.784728
'04-Sep-2017 09:15:00'	0.321692	0.029359	631.408	0.746967
'04-Sep-2017 09:45:00'	0.40886	0.6442	746.028	0.688768
'04-Sep-2017 10:15:00'	0.516199	1.1148	963.488	0.67669
'04-Sep-2017 10:45:00'	0.519254	0.86195	1078.49	0.656196
'04-Sep-2017 11:15:00'	0.411703	1.0849	1385.03	0.645329
'04-Sep-2017 11:45:00'	0.466359	1.1185	1490.59	0.665165
'04-Sep-2017 12:15:00'	0.452384	1.0209	1574.2	0.630964
'04-Sep-2017 12:45:00'	0.395185	1.0011	1660.12	0.594838
'04-Sep-2017 13:15:00'	0.614688	0.83006	1617.34	0.532987
'04-Sep-2017 13:45:00'	0.429786	1.0589	1647.73	0.526693
'04-Sep-2017 14:15:00'	0.44859	1.0291	1619.81	0.581133
'04-Sep-2017 14:45:00'	0.492711	1.0752	1539.47	0.617176
'04-Sep-2017 15:15:00'	0.432457	0.94377	1390.49	0.655366
'04-Sep-2017 15:45:00'	0.441326	0.81473	1258.69	0.648685
'04-Sep-2017 16:15:00'	0.40508	0.73694	1112.75	0.696009
'04-Sep-2017 16:45:00'	0.33629	0.62215	916.409	0.716914
'04-Sep-2017 17:15:00'	0.27064	0.56114	698.78	0.763862
'04-Sep-2017 17:45:00'	0.196202	0.36463	471.423	0.733281
'05-Sep-2017 09:15:00'	0.351274	0.81076	614.533	0.699958
'05-Sep-2017 09:45:00'	0.379618	0.92633	828.49	0.664133
'05-Sep-2017 10:15:00'	0.142809	1.0017	1112.14	0.599015
'05-Sep-2017 10:45:00'	0.260805	0.87578	1297.88	0.611698
'05-Sep-2017 11:15:00'	0.367399	1.3139	1257.6	0.617392
'05-Sep-2017 11:45:00'	0.410625	1.1244	1359.81	0.609657
'05-Sep-2017 12:15:00'	0.385714	1.0533	1490.79	0.608635
'05-Sep-2017 12:45:00'	0.374935	1.0043	1563.62	0.57257
'05-Sep-2017 13:15:00'	0.430293	1.2015	1593.5	0.488005
'05-Sep-2017 13:45:00'	0.44277	1.1635	1587.73	0.500498
'05-Sep-2017 14:15:00'	0.422003	1.0199	1538.74	0.529134
'05-Sep-2017 14:45:00'	0.377346	1.0529	1461.65	0.546916
'05-Sep-2017 15:15:00'	0.360215	0.95656	1338.68	0.597561
'05-Sep-2017 15:45:00'	0.366121	0.86165	1152.01	0.578469
'05-Sep-2017 16:15:00'	0.322895	0.77697	961.917	0.622953
'05-Sep-2017 16:45:00'	0.228051	0.69421	819.761	0.602084
'05-Sep-2017 17:15:00'	0.054426	0.16782	194.016	0.544813
'05-Sep-2017 17:45:00'	0.00656627	-0.15059	194.016	0.544813
'07-Sep-2017 09:15:00'	0.36998	0.64284	458.118	0.705689
'07-Sep-2017 09:45:00'	0.411553	0.39817	604.145	0.676346
'07-Sep-2017 10:15:00'	0.501301	0.74719	735.82	0.628181
'07-Sep-2017 10:45:00'	0.509544	0.77354	832.943	0.62846
'07-Sep-2017 11:15:00'	0.481716	0.85258	947.567	0.58979
'07-Sep-2017 11:45:00'	0.503719	0.94526	1027.89	0.597599
'07-Sep-2017 12:15:00'	0.49379	0.76026	1152.03	0.591708
'07-Sep-2017 12:45:00'	0.312828	0.57544	1318.7	0.562565
'07-Sep-2017 13:15:00'	0.524128	0.79562	1231.33	0.484688
'07-Sep-2017 13:45:00'	0.319581	0.62127	226.611	0.572134
'07-Sep-2017 14:15:00'	0.54904	0.88522	1014.62	0.508708
'07-Sep-2017 14:45:00'	0.675306	1.0238	1016.67	0.519005
'07-Sep-2017 15:15:00'	0.500748	0.80313	1127.81	0.540951
'07-Sep-2017 15:45:00'	0.359214	0.65914	1038.49	0.540791
'07-Sep-2017 16:15:00'	0.335676	0.54877	930.175	0.626141
'07-Sep-2017 16:45:00'	0.292165	0.53536	781.11	0.617136
'07-Sep-2017 17:15:00'	0.256814	0.39092	589.297	0.642093
'07-Sep-2017 17:45:00'	0.194626	0.19486	403.575	0.685383
'08-Sep-2017 09:15:00'	0.3432	0.1818	517.915	0.670302
'08-Sep-2017 09:45:00'	0.348173	0.94601	701.795	0.634982
'08-Sep-2017 10:15:00'	0.370059	0.68364	853.575	0.591364
'08-Sep-2017 10:45:00'	0.391622	0.76532	992.027	0.557719
'08-Sep-2017 11:15:00'	0.376605	0.75912	1189.73	0.532453
'08-Sep-2017 11:45:00'	0.361233	0.76185	1265.14	0.532208
'08-Sep-2017 12:15:00'	0.356259	0.76603	1465.89	0.476375
'08-Sep-2017 12:45:00'	0.236677	0.86183	1537.94	0.478595
'08-Sep-2017 13:15:00'	0.241197	0.4724	407.678	0.455272
'08-Sep-2017 13:45:00'	0.199159	0.50469	474.614	0.426107
'08-Sep-2017 14:15:00'	0.30397	0.6717	1602.33	0.482751
'08-Sep-2017 14:45:00'	0.305468	0.80582	1448.93	0.456477
'08-Sep-2017 15:15:00'	0.170441	0.52529	416.633	0.457237
'08-Sep-2017 15:45:00'	0.312753	0.51289	1328.92	0.489378
'08-Sep-2017 16:15:00'	0.265832	0.59789	1024.21	0.537901
'08-Sep-2017 16:45:00'	0.192368	0.41745	318.068	0.482064
'08-Sep-2017 17:15:00'	0.240001	0.3981	568.409	0.571165
'08-Sep-2017 17:45:00'	0.0581246	-0.0087738	190.349	0.47005
'09-Sep-2017 09:15:00'	0.309436	0.15024	527.228	0.671602
'09-Sep-2017 09:45:00'	0.313983	0.32716	705.402	0.567961
'09-Sep-2017 10:15:00'	0.378589	0.39518	892.224	0.508685
'09-Sep-2017 10:45:00'	0.474751	0.52694	1002.73	0.502114
'09-Sep-2017 11:15:00'	0.369146	0.56989	1250.53	0.428356
'09-Sep-2017 11:45:00'	0.283983	0.51467	1463.54	0.423191
'09-Sep-2017 12:15:00'	0.337218	0.51661	1027	0.41531
'09-Sep-2017 12:45:00'	0.138963	0.41936	306.63	0.41598
'09-Sep-2017 13:15:00'	0.125838	0.49321	280.496	0.422227
'09-Sep-2017 13:45:00'	0.46612	0.6001	1072.53	0.337822
'09-Sep-2017 14:15:00'	0.267843	0.43081	1567.98	0.38839
'09-Sep-2017 14:45:00'	0.218924	0.41779	1443.97	0.464765
'09-Sep-2017 15:15:00'	0.293073	0.60093	1421.71	0.439555
'09-Sep-2017 15:45:00'	0.0936493	0.5243	1076.27	0.4412
'09-Sep-2017 16:15:00'	0.292186	0.47036	1064.5	0.490579
'09-Sep-2017 16:45:00'	0.263896	0.39712	780.469	0.533224
'09-Sep-2017 17:15:00'	0.250957	0.32651	589.417	0.589551
'09-Sep-2017 17:45:00'	0.216553	0.19743	403.895	0.548548
'10-Sep-2017 09:15:00'	0.263465	0.3288	494.571	0.466678
'10-Sep-2017 09:45:00'	0.35328	0.38079	654.396	0.477885
'10-Sep-2017 10:15:00'	0.327383	0.42646	814.999	0.510252
'10-Sep-2017 10:45:00'	0.3689	0.51613	912.473	0.488457
'10-Sep-2017 11:15:00'	0.363027	0.56031	1022.45	0.433403
'10-Sep-2017 11:45:00'	0.311555	0.65264	1247.67	0.432476
'10-Sep-2017 12:15:00'	0.252926	0.53426	1311.1	0.407367
'10-Sep-2017 12:45:00'	0.313469	0.62049	1371.57	0.392408
'10-Sep-2017 13:15:00'	0.348612	0.6043	1377.62	0.342804
'10-Sep-2017 13:45:00'	0.390299	0.67524	1377.14	0.312052
'10-Sep-2017 14:15:00'	0.27099	0.65074	1391.4	0.356233
'10-Sep-2017 14:45:00'	0.227261	0.59165	1302.77	0.366253
'10-Sep-2017 15:15:00'	0.302401	0.58469	1092.46	0.377576
'10-Sep-2017 15:45:00'	0.178618	0.41725	1041.66	0.334818
'10-Sep-2017 16:15:00'	0.21148	0.55143	888.081	0.40831
'10-Sep-2017 16:45:00'	0.16202	0.2665	683.395	0.449857
'10-Sep-2017 17:15:00'	0.167735	0.31739	533.723	0.50601
'10-Sep-2017 17:45:00'	0.150662	0.19968	364.649	0.509077
'11-Sep-2017 09:15:00'	0.321922	0.22718	524.302	0.447453
'11-Sep-2017 09:45:00'	0.324185	0.25508	685.687	0.408065
'11-Sep-2017 10:15:00'	0.316982	0.40074	805.561	0.402585
'11-Sep-2017 10:45:00'	0.328906	0.54966	921.99	0.413284
'11-Sep-2017 11:15:00'	0.290599	0.31124	1060.36	0.380497
'11-Sep-2017 11:45:00'	0.223095	0.52794	1233.47	0.365845
'11-Sep-2017 12:15:00'	0.220167	0.54841	1252.78	0.342759
'11-Sep-2017 12:45:00'	0.234104	0.69274	1265.96	0.325575
'11-Sep-2017 13:15:00'	0.25984	0.70139	1221.55	0.250838
'11-Sep-2017 13:45:00'	0.207294	0.68365	916.883	0.250374
'11-Sep-2017 14:15:00'	0.213081	0.75689	934.78	0.274585
'11-Sep-2017 14:45:00'	0.163022	0.64948	831.748	0.319025
'11-Sep-2017 15:15:00'	0.167941	0.55273	713.408	0.267767
'11-Sep-2017 15:45:00'	0.115389	0.48239	593.167	0.279269
'11-Sep-2017 16:15:00'	0.107452	0.38168	435.62	0.273321
'11-Sep-2017 16:45:00'	0.0967709	0.35135	407.413	0.298428
'11-Sep-2017 17:15:00'	0.08512	0.20333	278.103	0.283009
'11-Sep-2017 17:45:00'	0.0386827	0.11192	184.75	0.298998
'12-Sep-2017 09:15:00'	0.0966439	-0.051472	333.553	0.318286
'12-Sep-2017 09:45:00'	0.0445913	0.20264	281.992	0.315522
'12-Sep-2017 10:15:00'	0.121909	0.48607	575.932	0.313622
'12-Sep-2017 10:45:00'	0.10087	0.4065	459.507	0.290651
'12-Sep-2017 11:15:00'	0.190136	0.66318	1137.17	0.292701
'12-Sep-2017 11:45:00'	0.138015	0.70343	1022.16	0.260933
'12-Sep-2017 12:15:00'	0.14689	0.81871	1207.75	0.266895
'12-Sep-2017 12:45:00'	0.131318	0.68251	618.667	0.229266
'12-Sep-2017 13:15:00'	0.161238	0.64798	735.669	0.234559
'12-Sep-2017 13:45:00'	0.152484	0.59894	709.893	0.233712
'12-Sep-2017 14:15:00'	0.31894	0.72053	1544.29	0.217522
'12-Sep-2017 14:45:00'	0.166032	0.75813	1581.93	0.235362
'12-Sep-2017 15:15:00'	0.122119	0.47897	578.738	0.233765
'12-Sep-2017 15:45:00'	0.145588	0.52518	592.031	0.212924
'12-Sep-2017 16:15:00'	0.108768	0.67374	913.702	0.218532
'12-Sep-2017 16:45:00'	0.0752087	0.3051	607.153	0.259234
'12-Sep-2017 17:15:00'	0.0534796	0.31323	273.864	0.217301
'12-Sep-2017 17:45:00'	0.114458	0.2869	526.325	0.289846
'13-Sep-2017 09:15:00'	0.040189	-0.00066751	200.971	0.213735
'13-Sep-2017 09:45:00'	0.0547744	0.006536	200.971	0.213735
'13-Sep-2017 10:15:00'	0.0952392	0.12168	201.397	0.222013
'13-Sep-2017 10:45:00'	0.120515	0.20689	270.191	0.237371
'13-Sep-2017 11:15:00'	0.172171	0.26336	307.511	0.216655
'13-Sep-2017 11:45:00'	0.170888	0.41442	511.961	0.205965
'13-Sep-2017 12:15:00'	0.144319	0.39166	282.258	0.168806
'13-Sep-2017 12:45:00'	0.119177	0.50922	288.379	0.184615
'13-Sep-2017 13:15:00'	0.110467	0.41909	341.232	0.179654
'13-Sep-2017 13:45:00'	0.153332	0.46011	497.206	0.178695
'13-Sep-2017 14:15:00'	0.0727771	0.3501	378.127	0.169884
'13-Sep-2017 14:45:00'	0.165999	0.72035	794.144	0.18324
'13-Sep-2017 15:15:00'	0.216089	0.72616	441.674	0.156827
'13-Sep-2017 15:45:00'	0.102837	0.42915	331.697	0.182556
'13-Sep-2017 16:15:00'	0.135312	0.41422	921.429	0.187719
'13-Sep-2017 16:45:00'	0.138378	0.45723	763.289	0.232243
'13-Sep-2017 17:15:00'	0.076076	0.21275	249.534	0.159846
'13-Sep-2017 17:45:00'	0.0714617	0.14547	278.881	0.233321
'14-Sep-2017 09:15:00'	0.102804	0.25884	341.767	0.167697
'14-Sep-2017 09:45:00'	0.141851	0.53986	819.216	0.122587
'14-Sep-2017 10:15:00'	0.135484	0.53348	864.579	0.197452
'14-Sep-2017 10:45:00'	0.187139	0.65824	977.418	0.171341
'14-Sep-2017 11:15:00'	0.129359	0.75739	1100.44	0.171323
'14-Sep-2017 11:45:00'	0.231897	0.68375	979.838	0.146138
'14-Sep-2017 12:15:00'	0.205134	0.79676	1325.94	0.149867
'14-Sep-2017 12:45:00'	0.128955	0.68488	1532.85	0.176438
'14-Sep-2017 13:15:00'	0.204523	0.65645	1929.87	0.147431
'14-Sep-2017 13:45:00'	0.151946	1.3774	444.904	0.124071
'14-Sep-2017 14:15:00'	0.198783	0.88838	1649.29	0.0990677
'14-Sep-2017 14:45:00'	0.148517	0.68016	1267.26	0.1376
'14-Sep-2017 15:15:00'	0.160959	0.55432	1233.61	0.140073
'14-Sep-2017 15:45:00'	0.0811248	0.26221	314.512	0.147648
'14-Sep-2017 16:15:00'	0.130963	0.43033	378.116	0.148197
'14-Sep-2017 16:45:00'	0.0766417	0.35452	350.89	0.168916
'14-Sep-2017 17:15:00'	0.055236	0.26457	189.819	0.157792
'14-Sep-2017 17:45:00'	0.0461471	0.22798	217.842	0.151583
'15-Sep-2017 09:15:00'	0.144294	0.35401	464.453	0.136581
'15-Sep-2017 09:45:00'	0.146621	0.30475	621.143	0.144269
'15-Sep-2017 10:15:00'	0.166555	0.57551	800.518	0.191318
'15-Sep-2017 10:45:00'	0.163554	0.61451	892.412	0.160338
'15-Sep-2017 11:15:00'	0.11205	0.56544	1107.13	0.180743
'15-Sep-2017 11:45:00'	0.127304	0.54091	1217.29	0.145721
'15-Sep-2017 12:15:00'	0.137039	0.5377	1354.35	0.114306
'15-Sep-2017 12:45:00'	0.0529102	0.37544	348.764	0.139428
'15-Sep-2017 13:15:00'	0.30271	0.7762	1508.75	0.127576
'15-Sep-2017 13:45:00'	NaN	NaN	1493.62	0.0974408
'15-Sep-2017 14:15:00'	NaN	NaN	1504.81	0.113562
'15-Sep-2017 14:45:00'	NaN	NaN	353.304	0.114252
'15-Sep-2017 15:15:00'	NaN	NaN	583.476	0.120697
'15-Sep-2017 15:45:00'	0.0896566	0.40634	1066.39	0.104535
'15-Sep-2017 16:15:00'	0.0404219	-0.025726	256.997	0.129621
'15-Sep-2017 16:45:00'	0.0797934	0.29941	333.689	0.1177
'15-Sep-2017 17:15:00'	0.129774	0.42235	487.199	0.122518
'15-Sep-2017 17:45:00'	0.0429914	0.19132	202.275	0.105833
'16-Sep-2017 09:15:00'	0.149492	0.73168	463.427	0.101458
'16-Sep-2017 09:45:00'	0.168438	0.40722	537.828	0.079145
'16-Sep-2017 10:15:00'	0.129765	0.45372	763.721	0.15734
'16-Sep-2017 10:45:00'	0.16332	0.37788	973.745	0.107924
'16-Sep-2017 11:15:00'	0.185312	0.50941	1065.16	0.116367
'16-Sep-2017 11:45:00'	0.154812	0.61782	1192.11	0.122245
'16-Sep-2017 12:15:00'	0.161921	0.78417	1374.6	0.125805
'16-Sep-2017 12:45:00'	0.0890907	0.591	947.636	0.101976
'16-Sep-2017 13:15:00'	0.281278	0.85073	1473.92	0.112338
'16-Sep-2017 13:45:00'	0.144302	0.67171	723.342	0.0629851
'16-Sep-2017 14:15:00'	0.114094	0.69456	473.717	0.106405
'16-Sep-2017 14:45:00'	0.155141	0.6935	1560.02	0.079022
'16-Sep-2017 15:15:00'	0.178956	0.53124	613.931	0.0669152
'16-Sep-2017 15:45:00'	0.199723	0.57155	618.157	0.082554
'16-Sep-2017 16:15:00'	0.0642473	0.36465	325.241	0.100603
'16-Sep-2017 16:45:00'	0.0402193	0.25318	211.637	0.0701171
'16-Sep-2017 17:15:00'	0.019412	0.10053	188.168	0.0827054
'16-Sep-2017 17:45:00'	0.0155498	0.090074	188.168	0.0827054
'17-Sep-2017 09:15:00'	0.064191	0.12547	392.216	0.0805637
'17-Sep-2017 09:45:00'	0.109292	0.4242	446.562	0.1164
'17-Sep-2017 10:15:00'	0.0591136	0.37088	338.729	0.0688585
'17-Sep-2017 10:45:00'	0.124406	0.36164	453.753	0.070714
'17-Sep-2017 11:15:00'	0.12594	0.37141	586.275	0.0884325
'17-Sep-2017 11:45:00'	0.0908625	0.47651	621.835	0.0747537
'17-Sep-2017 12:15:00'	0.0960731	0.60753	890.376	0.091937
'17-Sep-2017 12:45:00'	0.150636	0.5556	403.217	0.0766382
'17-Sep-2017 13:15:00'	0.226831	0.54636	1393.77	0.114506
'17-Sep-2017 13:45:00'	0.127207	0.4634	1520.07	0.0649919
'17-Sep-2017 14:15:00'	0.174747	0.62521	1308.68	0.0738898
'17-Sep-2017 14:45:00'	0.07401	0.50438	1307.24	0.0825667
'17-Sep-2017 15:15:00'	0.074904	0.29883	1007.34	0.079456
'17-Sep-2017 15:45:00'	0.0807247	0.35639	968.677	0.0928388
'17-Sep-2017 16:15:00'	0.0764842	0.47634	716.386	0.0939734
'17-Sep-2017 16:45:00'	0.0848066	0.4148	636.732	0.0957432
'17-Sep-2017 17:15:00'	0.0890531	0.33285	421.01	0.0993734
'17-Sep-2017 17:45:00'	0.0491859	0.20438	213.867	0.110983
'18-Sep-2017 09:15:00'	0.0356032	0.10251	200.897	0.0558026
'18-Sep-2017 09:45:00'	0.0617736	0.17916	273.333	0.0662647
'18-Sep-2017 10:15:00'	0.097469	0.26479	367.872	0.0722363
'18-Sep-2017 10:45:00'	0.0439887	0.34417	443.879	0.0663851
'18-Sep-2017 11:15:00'	0.0743253	0.29373	368.603	0.0763024
'18-Sep-2017 11:45:00'	0.0978613	0.40522	404.518	0.0685543
'18-Sep-2017 12:15:00'	0.0502931	0.22733	280.076	0.0697783
'18-Sep-2017 12:45:00'	0.0802376	0.3727	492.471	0.0580211
'18-Sep-2017 13:15:00'	0.0857238	0.30673	433.028	0.0618985
'18-Sep-2017 13:45:00'	0.0772907	0.31553	374.146	0.0764712
'18-Sep-2017 14:15:00'	0.0635774	-0.12822	276.765	0.0710361
'18-Sep-2017 14:45:00'	0.02837	NaN	251.498	0.0773611
'18-Sep-2017 15:15:00'	0.0718626	NaN	270.33	0.0840877
'18-Sep-2017 15:45:00'	0.117123	NaN	349.598	0.0728246
'18-Sep-2017 16:15:00'	0.0966366	0.42609	431.977	0.0703701
'18-Sep-2017 16:45:00'	0.0659112	0.2848	258.587	0.0642329
'18-Sep-2017 17:15:00'	0.0811652	0.20408	381.857	0.0697665
'18-Sep-2017 17:45:00'	0.066851	0.16841	298.723	0.0771362
'19-Sep-2017 09:15:00'	0.0472915	0.1425	295.894	0.057723
'19-Sep-2017 09:45:00'	0.0445902	0.14576	340.853	0.0481622
'19-Sep-2017 10:15:00'	0.0283285	0.51178	888.557	0.0224578
'19-Sep-2017 10:45:00'	0.0281621	0.33958	1022.15	0.0768307
'19-Sep-2017 11:15:00'	0.088224	0.44841	533.747	0.080771
'19-Sep-2017 11:45:00'	0.139905	0.57475	1439.41	0.0559188
'19-Sep-2017 12:15:00'	0.121753	0.55898	1376.59	0.0650428
'19-Sep-2017 12:45:00'	0.145347	0.47172	1350.21	0.0454312
'19-Sep-2017 13:15:00'	0.138699	0.48996	435.194	0.0440323
'19-Sep-2017 13:45:00'	0.0662013	0.50698	728.714	0.0374305
'19-Sep-2017 14:15:00'	0.174583	0.56017	589.5	0.0229052
'19-Sep-2017 14:45:00'	0.152988	0.55785	1015.71	0.0246551
'19-Sep-2017 15:15:00'	0.164842	0.48596	1191.5	0.0487195
'19-Sep-2017 15:45:00'	0.120481	0.46606	1019.48	0.0474071
'19-Sep-2017 16:15:00'	0.0867102	0.8179	840.553	0.0352032
'19-Sep-2017 16:45:00'	0.0677418	0.28287	638.386	0.0269738
'19-Sep-2017 17:15:00'	0.0678199	0.24141	448.841	0.0418916
'19-Sep-2017 17:45:00'	0.039404	0.19331	286.252	0.0406068
'20-Sep-2017 09:15:00'	0.0506047	0.17863	305.521	0.0883216
'20-Sep-2017 09:45:00'	0.0708389	0.2579	297.802	0.0877627
'20-Sep-2017 10:15:00'	0.0596065	0.29887	416.428	0.064602
'20-Sep-2017 10:45:00'	0.072757	0.39488	1074.52	0.0393315
'20-Sep-2017 11:15:00'	0.0874172	0.52021	1109.44	0.0448095
'20-Sep-2017 11:45:00'	0.1884	0.6303	1722.42	0.0732506
'20-Sep-2017 12:15:00'	0.0850031	0.60624	1894.72	0.0724933
'20-Sep-2017 12:45:00'	0.166268	0.52674	535.402	0.0867427
'20-Sep-2017 13:15:00'	0.257241	0.49964	1377.87	0.0925441
'20-Sep-2017 13:45:00'	0.170908	0.4742	1245.59	0.0735655
'20-Sep-2017 14:15:00'	0.180993	0.50777	1198.66	0.0528927
'20-Sep-2017 14:45:00'	0.125084	0.48479	1117.09	0.0458362
'20-Sep-2017 15:15:00'	0.133498	0.49943	1025.79	0.0521803
'20-Sep-2017 15:45:00'	0.101482	0.39737	902.512	0.036821
'20-Sep-2017 16:15:00'	0.0718542	0.38166	768.463	0.0357842
'20-Sep-2017 16:45:00'	0.0739818	0.31126	603.478	0.0542684
'20-Sep-2017 17:15:00'	0.0607662	0.30819	435.445	0.0352484
'20-Sep-2017 17:45:00'	0.0527446	0.24127	272.785	0.0308727
'21-Sep-2017 09:15:00'	0.06839	-0.062115	414.378	0.0472663
'21-Sep-2017 09:45:00'	0.0629985	0.25854	573.657	0.0214002
'21-Sep-2017 10:15:00'	0.0897911	0.49746	751.515	0.040021
'21-Sep-2017 10:45:00'	0.110508	0.39003	877.802	0.0320941
'21-Sep-2017 11:15:00'	0.104549	0.52378	1003.1	0.0481423
'21-Sep-2017 11:45:00'	0.0438836	0.42731	1099.58	0.0559592
'21-Sep-2017 12:15:00'	0.156927	0.51805	897.154	0.0735886
'21-Sep-2017 12:45:00'	0.151394	0.43503	636.248	0.0819811
'21-Sep-2017 13:15:00'	0.134305	0.46159	470.63	0.0686724
'21-Sep-2017 13:45:00'	0.133043	0.50641	1118.49	0.0565667
'21-Sep-2017 14:15:00'	0.196233	0.52738	1221.02	0.0737301
'21-Sep-2017 14:45:00'	0.109695	0.5565	1180.31	0.064165
'21-Sep-2017 15:15:00'	0.0483244	0.40019	295.146	0.0803956
'21-Sep-2017 15:45:00'	0.12731	0.4497	405.611	0.0589706
'21-Sep-2017 16:15:00'	0.0743676	0.42111	840.87	0.00651436
'21-Sep-2017 16:45:00'	0.0963028	0.28073	340.433	0.0383845
'21-Sep-2017 17:15:00'	0.0315159	0.23259	202.674	0.0380006
'21-Sep-2017 17:45:00'	0.0210564	0.1267	242.052	0.0348598
'22-Sep-2017 09:15:00'	0.0158604	NaN	252.81	0.0591952
'22-Sep-2017 09:45:00'	0.0371573	0.048578	384.146	0.0588706
'22-Sep-2017 10:15:00'	0.0406721	0.21122	392.287	0.0576548
'22-Sep-2017 10:45:00'	0.107431	0.31056	486.871	0.0517475
'22-Sep-2017 11:15:00'	0.0693639	0.37914	476.944	0.029959
'22-Sep-2017 11:45:00'	0.126716	0.50204	574	0.0364331
'22-Sep-2017 12:15:00'	0.139716	0.56606	841.272	0.0586389
'22-Sep-2017 12:45:00'	0.170041	0.5311	933.838	0.0678313
'22-Sep-2017 13:15:00'	0.146803	0.51511	722.827	0.0783429
'22-Sep-2017 13:45:00'	0.105394	0.38	565.806	0.0608157
'22-Sep-2017 14:15:00'	0.0976768	0.37798	498.229	0.0587907
'22-Sep-2017 14:45:00'	0.121507	0.39806	557.435	0.0504265
'22-Sep-2017 15:15:00'	0.149895	0.42834	694.96	0.0519848
'22-Sep-2017 15:45:00'	0.103273	0.38312	575.02	0.0643573
'22-Sep-2017 16:15:00'	0.0873468	0.31813	486.476	0.0483793
'22-Sep-2017 16:45:00'	0.0612483	0.25483	328.881	0.0556146
'22-Sep-2017 17:15:00'	0.0200029	0.1978	184.684	0.0505791
'22-Sep-2017 17:45:00'	0.0136661	0.070953	184.684	0.0505791
'23-Sep-2017 09:15:00'	0.041121	NaN	499.2	0.041244
'23-Sep-2017 09:45:00'	0.0377152	-0.020236	394.863	0.0388772
'23-Sep-2017 10:15:00'	0.0827968	0.34129	801.072	-0.00843215
'23-Sep-2017 10:45:00'	0.0956063	0.4845	896.473	0.0356658
'23-Sep-2017 11:15:00'	0.0766411	0.3855	1009.19	0.0248222
'23-Sep-2017 11:45:00'	0.141442	0.41321	1107.64	0.0345311
'23-Sep-2017 12:15:00'	0.0846052	0.43516	1166.03	0.0301408
'23-Sep-2017 12:45:00'	0.179276	0.42143	1205.77	0.0961011
'23-Sep-2017 13:15:00'	0.273838	0.44004	1223.76	0.104413
'23-Sep-2017 13:45:00'	0.150608	0.41138	1207.7	0.0379352
'23-Sep-2017 14:15:00'	0.123736	0.40554	1159.88	0.0674491
'23-Sep-2017 14:45:00'	0.10374	0.38807	1099.03	0.043432
'23-Sep-2017 15:15:00'	0.0942326	0.41226	1014.93	0.0182091
'23-Sep-2017 15:45:00'	0.0864813	0.36315	888.668	0.0239338
'23-Sep-2017 16:15:00'	0.0674896	0.32973	741.733	0.0115187
'23-Sep-2017 16:45:00'	0.0611094	0.31313	583.869	0.0173294
'23-Sep-2017 17:15:00'	0.0511962	0.24445	415.712	-0.00764935
'23-Sep-2017 17:45:00'	0.0338737	0.18433	338.085	-0.00359371
'24-Sep-2017 09:15:00'	0.0619695	1.1806	407.843	-0.0284606
'24-Sep-2017 09:45:00'	0.0724117	0.37971	565.366	-0.0164311
'24-Sep-2017 10:15:00'	0.0622107	0.28051	721.563	0.0127888
'24-Sep-2017 10:45:00'	0.0777887	0.3741	850.637	0.0083859
'24-Sep-2017 11:15:00'	0.0662232	0.43907	966.743	0.0389118
'24-Sep-2017 11:45:00'	0.0733515	0.40855	1003.82	0.0451677
'24-Sep-2017 12:15:00'	0.100652	0.45657	1129.5	0.0428059
'24-Sep-2017 12:45:00'	0.168171	0.46796	1189.22	0.0508393
'24-Sep-2017 13:15:00'	0.244439	0.50278	1195.35	0.100456
'24-Sep-2017 13:45:00'	0.139621	0.55128	1186.84	0.0270665
'24-Sep-2017 14:15:00'	0.161198	0.48128	1134.85	0.0339089
'24-Sep-2017 14:45:00'	0.111975	0.5916	1079.9	0.0248236
'24-Sep-2017 15:15:00'	0.0997043	0.50782	1008.02	0.0135407
'24-Sep-2017 15:45:00'	0.060912	0.48977	867.878	-0.000710468
'24-Sep-2017 16:15:00'	0.057718	0.43173	722.292	-0.0143731
'24-Sep-2017 16:45:00'	0.0499685	0.3665	553.36	-0.0101699
'24-Sep-2017 17:15:00'	0.0531502	0.32354	384.635	0.00130341
'24-Sep-2017 17:45:00'	0.0345755	0.26238	195.657	0.00211887
'25-Sep-2017 09:15:00'	0.0690363	NaN	407.752	-0.0184102
'25-Sep-2017 09:45:00'	0.0627649	NaN	564.36	0.0150995
'25-Sep-2017 10:15:00'	0.0300558	0.48901	725.915	0.0172501
'25-Sep-2017 10:45:00'	0.0618661	0.44365	811.17	0.0134548
'25-Sep-2017 11:15:00'	0.0585341	0.48085	836.296	0.0165772
'25-Sep-2017 11:45:00'	0.0694398	0.45434	1036.77	0.0423162
'25-Sep-2017 12:15:00'	0.0647203	0.5345	1124.16	0.051158
'25-Sep-2017 12:45:00'	0.191212	0.56761	1171.44	0.0804198
'25-Sep-2017 13:15:00'	0.24923	0.48519	1195.76	0.143003
'25-Sep-2017 13:45:00'	0.127494	0.41401	1169.84	0.0406516
'25-Sep-2017 14:15:00'	0.117359	0.4168	1039.02	0.045914
'25-Sep-2017 14:45:00'	0.0929005	0.51972	1113.49	0.0425462
'25-Sep-2017 15:15:00'	0.0827599	0.50812	944.656	0.0149435
'25-Sep-2017 15:45:00'	0.0645456	0.44573	729.256	0.025126
'25-Sep-2017 16:15:00'	0.0464824	0.37341	494.646	0.0273022
'25-Sep-2017 16:45:00'	0.0969735	0.42846	531.13	0.00807861
'25-Sep-2017 17:15:00'	0.0287169	0.28577	269.188	0.00215416
'25-Sep-2017 17:45:00'	0.00971787	0.18892	196.097	0.00658282
'26-Sep-2017 09:15:00'	0.0427268	0.10913	277.324	0.071416
'26-Sep-2017 09:45:00'	0.0671251	-0.0027869	283.455	0.0541687
'26-Sep-2017 10:15:00'	0.0536952	0.17846	279.082	0.0250841
'26-Sep-2017 10:45:00'	0.0518971	0.1972	527.263	0.0506977
'26-Sep-2017 11:15:00'	0.0550853	0.29021	626.938	0.0413911
'26-Sep-2017 11:45:00'	0.031221	0.41259	1148.61	0.0641213
'26-Sep-2017 12:15:00'	0.0955916	0.35973	872.28	0.0456892
'26-Sep-2017 12:45:00'	0.0943939	0.39192	1140.97	0.0943916
'26-Sep-2017 13:15:00'	0.280388	0.45109	1293.63	0.109438
'26-Sep-2017 13:45:00'	0.0811839	0.37232	1294.63	0.0795755
'26-Sep-2017 14:15:00'	0.171697	0.3619	762.249	0.0579306
'26-Sep-2017 14:45:00'	0.10726	0.40228	715.44	0.0555925
'26-Sep-2017 15:15:00'	0.0661354	0.30934	776.842	0.0352488
'26-Sep-2017 15:45:00'	0.0822045	0.32334	824.758	0.0409374
'26-Sep-2017 16:15:00'	0.0723944	0.27463	588.862	0.00192758
'26-Sep-2017 16:45:00'	0.0589116	0.35001	706.203	-0.030767
'26-Sep-2017 17:15:00'	0.0240203	0.23833	347.207	-0.0187124
'26-Sep-2017 17:45:00'	0.0403202	0.16098	289.344	-0.00160431
'27-Sep-2017 09:15:00'	0.0464514	0.13692	406.272	-0.0242823
'27-Sep-2017 09:45:00'	0.0529798	0.22858	566.777	0.0355446
'27-Sep-2017 10:15:00'	0.04233	0.29296	763.809	0.00379858
'27-Sep-2017 10:45:00'	0.119425	0.2703	329.422	0.0197213
'27-Sep-2017 11:15:00'	0.0160844	0.28266	1090.17	0.043256
'27-Sep-2017 11:45:00'	0.0365148	0.36119	930.889	0.0571759
'27-Sep-2017 12:15:00'	0.0523407	0.43748	1277.17	0.0735403
'27-Sep-2017 12:45:00'	0.0378507	0.36509	512.771	0.076218
'27-Sep-2017 13:15:00'	0.0564936	0.36024	297.277	0.0649195
'27-Sep-2017 13:45:00'	0.0294127	0.39086	279.386	0.0418132
'27-Sep-2017 14:15:00'	0.169506	0.43741	1223.39	0.089179
'27-Sep-2017 14:45:00'	0.0992783	0.44903	1069.5	0.0370887
'27-Sep-2017 15:15:00'	0.080702	0.42975	1051.38	0.037102
'27-Sep-2017 15:45:00'	0.0570315	0.43024	865.19	0.0165828
'27-Sep-2017 16:15:00'	0.0690755	0.4244	796.951	0.0235859
'27-Sep-2017 16:45:00'	0.0153326	0.29379	196.836	0.0136118
'27-Sep-2017 17:15:00'	0.0356538	0.26239	206.888	0.029172
'27-Sep-2017 17:45:00'	0.0417092	0.28194	200.449	0.0134363
'28-Sep-2017 09:15:00'	0.0643725	0.14917	378.023	-0.0189866
'28-Sep-2017 09:45:00'	0.0716323	0.20106	544.534	-0.000520129
'28-Sep-2017 10:15:00'	0.111537	0.21923	699.497	0.018226
'28-Sep-2017 10:45:00'	0.0850868	0.26614	823.766	0.0437207
'28-Sep-2017 11:15:00'	0.0901255	0.22177	936.491	0.0716335
'28-Sep-2017 11:45:00'	0.136174	0.27768	1037.79	0.0534191
'28-Sep-2017 12:15:00'	0.122649	0.3601	1093.82	0.0378374
'28-Sep-2017 12:45:00'	0.331238	0.30006	1158.53	0.145984
'28-Sep-2017 13:15:00'	0.303535	0.29957	1168.63	0.138037
'28-Sep-2017 13:45:00'	0.214138	0.29546	1161.86	0.0964351
'28-Sep-2017 14:15:00'	0.22285	0.24288	1123.5	0.0764453
'28-Sep-2017 14:45:00'	0.142911	0.25001	1050.93	0.0741096
'28-Sep-2017 15:15:00'	0.127948	0.25192	954.747	0.0309555
'28-Sep-2017 15:45:00'	0.101765	0.22866	835.138	0.0118816
'28-Sep-2017 16:15:00'	0.0945636	0.17885	689.43	0.0264721
'28-Sep-2017 16:45:00'	0.0542895	0.17571	532.239	0.00529707
'28-Sep-2017 17:15:00'	0.0642893	0.14444	362.148	0.00282193
'28-Sep-2017 17:45:00'	0.0494705	0.074358	247.844	0.0217746
'29-Sep-2017 09:15:00'	0.0447639	0.31157	392.676	0.0149067
'29-Sep-2017 09:45:00'	0.0941751	0.12679	555.25	-0.000493555
'29-Sep-2017 10:15:00'	0.119153	0.18218	699.915	0.0220293
'29-Sep-2017 10:45:00'	0.103056	0.17178	822.226	0.0353145
'29-Sep-2017 11:15:00'	0.126466	0.25317	932.121	0.0371754
'29-Sep-2017 11:45:00'	0.138854	0.26388	1012.28	0.0544555
'29-Sep-2017 12:15:00'	0.145943	0.25712	1105.2	0.0740959
'29-Sep-2017 12:45:00'	0.337843	0.3087	1131.22	0.133316
'29-Sep-2017 13:15:00'	0.423757	0.30273	1195.22	0.142544
'29-Sep-2017 13:45:00'	0.239259	0.27455	1144.38	0.0879342
'29-Sep-2017 14:15:00'	0.211282	0.21925	1092.37	0.0789608
'29-Sep-2017 14:45:00'	0.127529	0.17482	909.731	0.0549758
'29-Sep-2017 15:15:00'	0.134235	0.22369	798.615	0.0481908
'29-Sep-2017 15:45:00'	0.144911	0.18846	773.795	0.0387058
'29-Sep-2017 16:15:00'	0.163823	0.16109	462.767	0.0312693
'29-Sep-2017 16:45:00'	0.0891791	0.12953	514.705	-0.0107742
'29-Sep-2017 17:15:00'	0.0789466	0.075949	340.114	-0.0125426
'29-Sep-2017 17:45:00'	0.050655	0.099426	340.114	-0.0125426
'30-Sep-2017 09:15:00'	0.0490545	0.10854	392.178	0.0126538
'30-Sep-2017 09:45:00'	0.078506	0.11416	559.143	0.0182694
'30-Sep-2017 10:15:00'	0.0968208	0.15888	715.713	0.0361233
'30-Sep-2017 10:45:00'	0.0984629	0.16893	875.873	0.0397663
'30-Sep-2017 11:15:00'	0.142157	0.24021	1219.53	0.0928518
'30-Sep-2017 11:45:00'	0.0987395	0.16515	397.614	0.0703526
'30-Sep-2017 12:15:00'	0.133048	0.15349	436.29	0.099932
'30-Sep-2017 12:45:00'	0.0819079	0.12016	291.511	0.101327
'30-Sep-2017 13:15:00'	0.14498	0.16605	462.333	0.0943951
'30-Sep-2017 13:45:00'	0.104606	0.1451	364.996	0.0987
'30-Sep-2017 14:15:00'	0.105099	0.20167	739.452	0.0905441
'30-Sep-2017 14:45:00'	0.13976	0.18885	313.06	0.0658297
'30-Sep-2017 15:15:00'	0.124011	0.15415	552.483	0.059764
'30-Sep-2017 15:45:00'	0.0855736	0.15731	259.462	0.0812779
'30-Sep-2017 16:15:00'	0.0806201	0.15043	863.214	0.0339881
'30-Sep-2017 16:45:00'	0.0625641	0.10889	240.11	0.0919589
'30-Sep-2017 17:15:00'	0.0780466	0.10933	376.664	0.00910888
'30-Sep-2017 17:45:00'	0.0589199	0.044789	242.305	0.00689925
'01-Oct-2017 09:15:00'	0.050084	0.053657	390.488	0.0116804
'01-Oct-2017 09:45:00'	0.0760757	0.080842	571.138	-0.000113153
'01-Oct-2017 10:15:00'	0.096123	0.14519	726.244	0.0267386
'01-Oct-2017 10:45:00'	0.107362	0.14521	855.759	-0.000886137
'01-Oct-2017 11:15:00'	0.109127	0.19213	973.894	0.0338976
'01-Oct-2017 11:45:00'	0.117597	0.17277	1060.46	0.0483754
'01-Oct-2017 12:15:00'	0.112656	0.23615	1160.5	0.069842
'01-Oct-2017 12:45:00'	0.073552	0.13799	292.628	0.106832
'01-Oct-2017 13:15:00'	0.324663	0.17225	1224.35	0.139657
'01-Oct-2017 13:45:00'	0.198006	0.24217	1156.03	0.0745164
'01-Oct-2017 14:15:00'	0.230275	0.25371	1137.75	0.0943314
'01-Oct-2017 14:45:00'	0.171266	0.2552	1046.1	0.0625107
'01-Oct-2017 15:15:00'	0.117504	0.23378	935.934	0.0249874
'01-Oct-2017 15:45:00'	0.105996	0.21894	802.257	0.0146356
'01-Oct-2017 16:15:00'	0.0668222	0.17429	657.164	0.00919079
'01-Oct-2017 16:45:00'	0.0749384	0.1437	495.254	0.00136406
'01-Oct-2017 17:15:00'	0.065527	0.10208	335.658	-0.0040532
'01-Oct-2017 17:45:00'	0.0410066	0.061424	335.658	-0.0040532
'02-Oct-2017 09:15:00'	0.0748962	-0.15589	368.827	-0.00353186
'02-Oct-2017 09:45:00'	0.0908156	NaN	508.626	0.0343639
'02-Oct-2017 10:15:00'	0.0961168	-0.066337	650.983	0.00737277
'02-Oct-2017 10:45:00'	0.110978	0.17538	792.174	0.0196717
'02-Oct-2017 11:15:00'	0.134852	0.2414	868.198	0.0463046
'02-Oct-2017 11:45:00'	0.142252	0.24138	1071.57	0.0664472
'02-Oct-2017 12:15:00'	0.120978	0.33244	1094.29	0.0818274
'02-Oct-2017 12:45:00'	0.338656	0.31945	1136.59	0.184622
'02-Oct-2017 13:15:00'	0.410822	0.28393	1149.81	0.165289
'02-Oct-2017 13:45:00'	0.186868	0.29167	1133.43	0.0850217
'02-Oct-2017 14:15:00'	0.209682	0.3331	1074.68	0.0886636
'02-Oct-2017 14:45:00'	0.144628	0.23927	999.555	0.0830475
'02-Oct-2017 15:15:00'	0.0881923	0.3283	908.765	0.046883
'02-Oct-2017 15:45:00'	0.0956365	0.27549	776.32	0.0101896
'02-Oct-2017 16:15:00'	0.114109	0.21818	635.949	0.0108475
'02-Oct-2017 16:45:00'	0.0829762	0.11136	477.315	0.00702393
'02-Oct-2017 17:15:00'	0.0492402	0.1271	312.44	-0.000848928
'02-Oct-2017 17:45:00'	0.0294927	0.098719	187.067	-0.0169994

## Sheet: LeafMeasurements
	sunlit leaves						shaded leaves
Datetime	PhiP	PhiN	PhiDs	PhiFs	APAR		PhiP	PhiN	PhiDs	PhiFs	APAR
11Jul2017 01:23:57'	0.8295	0.030488	0.227256	127.479	0		0.81825	0.0143975	0.530332	62.4228	0
11Jul2017 01:33:57'	0.82925	0.0306788	0.227256	127.751	0		0.8175	0.0152909	0.530332	62.9903	0
11Jul2017 01:43:57'	0.8295	0.0308538	0.227256	127.751	0		0.81675	0.0156055	0.530332	63.3308	0
11Jul2017 01:53:58'	0.829	0.031238	0.227256	128.296	0		0.816	0.0155623	0.530332	63.5578	0
11Jul2017 02:03:58'	0.82925	0.0314125	0.227256	128.296	0		0.815375	0.0151955	0.530332	63.6145	0
11Jul2017 02:13:58'	0.82925	0.0314125	0.227256	128.296	0		0.81475	0.01505	0.530332	63.728	0
11Jul2017 02:23:58'	0.8295	0.0310746	0.227256	128.024	0		0.81525	0.014757	0.530332	63.501	0
11Jul2017 02:33:57'	0.83025	0.0305009	0.227256	127.206	0		0.815625	0.0142134	0.530332	63.2173	0
11Jul2017 02:43:57'	0.83075	0.0300497	0.227256	126.662	0		0.816375	0.0137607	0.530332	62.8768	0
11Jul2017 02:53:57'	0.831	0.0294241	0.227256	126.117	0		0.81725	0.0129436	0.530332	62.3661	0
11Jul2017 03:03:58'	0.831	0.0286222	0.227256	125.572	0		0.8175	0.0120024	0.530332	61.9689	0
11Jul2017 03:13:58'	0.83075	0.0271351	0.227256	124.755	0		0.8175	0.0110348	0.530332	61.6284	0
11Jul2017 03:23:58'	0.831	0.0251582	0.227256	123.393	0		0.8175	0.00924506	0.530332	61.0041	0
11Jul2017 03:33:58'	0.831	0.0191432	0.227256	119.579	0		0.817625	0.00623078	0.530332	59.9827	0
11Jul2017 03:43:57'	0.831	0.0130926	0.227256	115.766	0		0.818125	0.00299377	0.530332	58.791	0
11Jul2017 03:53:57'	0.83125	0.00233233	0.227256	108.684	0		0.819375	0.000634693	0.530332	57.2588	0
11Jul2017 04:03:57'	0.831	0.00844211	0.227256	101.874	0		0.81975	0.00303812	0.530332	56.4075	0
11Jul2017 04:13:57'	0.8305	0.0134147	0.227256	99.1502	0		0.820375	0.00336729	0.530332	56.1238	0
11Jul2017 04:23:58'	0.83025	0.0126771	0.227256	99.6949	0		0.821	0.00265082	0.530332	56.1806	0
11Jul2017 04:33:58'	0.83025	0.00622727	0.227256	103.781	0		0.82125	0.00142952	0.530332	56.521	0
11Jul2017 04:43:58'	0.83	0.0013319	0.227256	107.049	0		0.822	0.000665094	0.530332	56.521	0
11Jul2017 04:53:57'	0.8305	0.00103173	0.227256	108.139	0		0.82275	0.000854435	0.530332	56.2373	0
11Jul2017 05:03:57'	0.83	0.00852101	0.227256	102.419	0		0.823	0.00202454	0.530332	55.7833	0
11Jul2017 05:13:57'	0.828	0.021804	0.227256	95.3367	0		0.822875	0.00367504	0.530332	55.2726	0
11Jul2017 05:23:57'	0.82625	0.0347337	0.227256	88.2545	0		0.821625	0.00464399	0.530332	55.3861	0
11Jul2017 05:33:58'	0.823	0.0496737	0.227256	80.9	0		0.8185	0.00620865	0.530332	55.8401	0
11Jul2017 05:43:58'	0.81875	0.0620377	0.227256	75.7246	1		0.81475	0.00776086	0.530332	56.521	1
11Jul2017 05:53:58'	0.81075	0.0785802	0.227256	70.2768	3.5		0.80925	0.0144839	0.530332	56.1238	3.75
11Jul2017 06:03:58'	0.79575	0.100896	0.227256	65.6461	7.75		0.8015	0.0265999	0.530332	54.7051	8.125
11Jul2017 06:13:57'	0.77625	0.125536	0.227256	62.3774	13.25		0.793125	0.0422164	0.530332	52.4352	13.125
11Jul2017 06:23:57'	0.76125	0.144429	0.227256	59.9259	16.5		0.786875	0.0581318	0.530332	49.3708	17.375
11Jul2017 06:33:57'	0.753	0.154802	0.227256	58.564	19		0.781125	0.0691351	0.530332	47.7251	20.375
11Jul2017 06:43:58'	0.74525	0.159966	0.227256	60.1983	23.75		0.77775	0.0755633	0.530332	46.7604	26.25
11Jul2017 06:53:58'	0.73925	0.162535	0.227256	62.3774	30.25		0.773625	0.0782758	0.530332	47.2144	34.125
11Jul2017 07:03:58'	0.726	0.168927	0.227256	66.7357	41.75		0.766375	0.0803052	0.530332	48.9168	44.25
11Jul2017 07:13:58'	0.71225	0.172861	0.227256	73.0007	51.75		0.76175	0.0778215	0.530332	51.2435	53.75
11Jul2017 07:23:57'	0.71025	0.161235	0.227256	81.7172	59.75		0.757	0.0725079	0.530332	54.5349	62.25
11Jul2017 07:33:57'	0.7065	0.144434	0.227256	94.7919	71.75		0.752375	0.0672992	0.530332	57.7127	74.875
11Jul2017 07:43:57'	0.70575	0.110901	0.227256	116.583	86.75		0.745875	0.0635043	0.530332	61.0041	91.875
11Jul2017 07:53:58'	0.696	0.079458	0.227256	142.733	118.75		0.73425	0.0610018	0.530332	65.4305	117.125
11Jul2017 08:03:58'	0.67625	0.061328	0.227256	166.703	165.75		0.72225	0.0576722	0.530332	70.1973	155.875
11Jul2017 08:13:58'	0.669	0.0426887	0.227256	183.046	187.25		0.717125	0.0507014	0.530332	73.9427	169
11Jul2017 08:23:58'	0.65	0.0467024	0.227256	192.58	235		0.70825	0.0479206	0.530332	77.5746	192.625
11Jul2017 08:33:57'	0.648	0.0482942	0.227256	192.853	237		0.70825	0.0451767	0.530332	78.4258	190
11Jul2017 08:43:57'	0.647	0.0493422	0.227256	192.853	234.25		0.70675	0.0466479	0.530332	78.4258	184.5
11Jul2017 08:53:57'	0.63575	0.0560596	0.227256	195.849	258		0.698125	0.0533087	0.530332	79.05	194.875
11Jul2017 09:03:57'	0.629	0.0628182	0.227256	195.849	250.25		0.698125	0.053143	0.530332	79.05	193.5
11Jul2017 09:13:58'	0.62525	0.0656805	0.227256	196.394	257		0.696875	0.0536961	0.530332	79.277	199.5
11Jul2017 09:23:58'	0.62125	0.0679936	0.227256	197.483	264.75		0.698625	0.051928	0.530332	79.3337	193.625
11Jul2017 09:33:58'	0.56725	0.106411	0.227256	207.289	362		0.68275	0.0618229	0.530332	81.2632	235.125
11Jul2017 09:43:58'	0.555	0.116823	0.227256	208.379	401.75		0.67525	0.0671028	0.530332	82.0009	244.875
11Jul2017 09:53:57'	0.50325	0.156613	0.227256	216.006	519.75		0.651375	0.0821938	0.530332	84.7816	284.375
11Jul2017 10:03:57'	0.4585	0.193714	0.227256	220.909	611.75		0.630875	0.0968451	0.530332	86.5975	319.375
11Jul2017 10:13:57'	0.47125	0.198558	0.227256	209.741	583		0.622375	0.106312	0.530332	86.3138	322
11Jul2017 10:23:58'	0.4375	0.235354	0.227256	207.834	607.25		0.609875	0.114534	0.530332	87.6757	336
11Jul2017 10:33:58'	0.44225	0.237484	0.227256	203.476	571.75		0.614125	0.1121	0.530332	87.1082	342.25
11Jul2017 10:43:58'	0.482	0.209611	0.227256	195.849	482.25		0.628625	0.102628	0.530332	85.5193	334.5
11Jul2017 10:53:58'	0.5085	0.177964	0.227256	199.117	439.25		0.64825	0.0849915	0.530332	84.8383	321.5
11Jul2017 11:03:57'	0.54175	0.13875	0.227256	202.931	413.75		0.66275	0.072796	0.530332	84.1006	317.375
11Jul2017 11:13:57'	0.50625	0.179373	0.227256	199.662	507		0.65125	0.0807866	0.530332	85.2355	336.375
11Jul2017 11:23:57'	0.4375	0.235303	0.227256	207.834	642		0.6335	0.0906354	0.530332	87.7325	365.75
11Jul2017 11:33:57'	0.449	0.234137	0.227256	201.297	603.5		0.638875	0.0900194	0.530332	86.257	330.625
11Jul2017 11:43:58'	0.48075	0.213878	0.227256	193.942	539.25		0.651875	0.083298	0.530332	84.3276	297.75
11Jul2017 11:53:58'	0.56775	0.130702	0.227256	191.491	348		0.686875	0.0598304	0.530332	80.6957	230
11Jul2017 12:03:58'	0.654	0.0560905	0.227256	184.136	191.25		0.714625	0.0418629	0.530332	77.6881	182.125
11Jul2017 12:13:57'	0.6575	0.0444841	0.227256	189.311	207.25		0.717875	0.0366619	0.530332	78.369	193
11Jul2017 12:23:57'	0.6105	0.0786805	0.227256	197.483	290		0.701	0.0470052	0.530332	80.412	216.75
11Jul2017 12:33:57'	0.56025	0.118616	0.227256	204.021	387.25		0.68075	0.0593752	0.530332	82.8521	275.25
11Jul2017 12:43:57'	0.54375	0.134213	0.227256	204.565	410.25		0.67025	0.0690442	0.530332	83.0791	301.625
11Jul2017 12:53:58'	0.5425	0.137631	0.227256	203.203	414.75		0.667625	0.0730334	0.530332	82.6251	328.5
11Jul2017 13:03:58'	0.55475	0.12187	0.227256	205.382	422.25		0.667375	0.0737177	0.530332	82.5116	369
11Jul2017 13:13:58'	0.5685	0.0952123	0.227256	213.554	422		0.668	0.0722343	0.530332	82.7954	364.5
11Jul2017 13:23:58'	0.56	0.0981111	0.227256	217.095	446.75		0.665375	0.0723989	0.530332	83.5899	373.25
11Jul2017 13:33:57'	0.561	0.0982491	0.227256	216.278	446		0.66275	0.0740126	0.530332	83.9303	372.375
11Jul2017 13:43:57'	0.586	0.086172	0.227256	208.106	380.75		0.668	0.0729411	0.530332	82.6251	346.125
11Jul2017 13:53:57'	0.6135	0.0723675	0.227256	199.39	320.75		0.678875	0.0674894	0.530332	80.9794	318.125
11Jul2017 14:03:58'	0.61725	0.0669713	0.227256	200.479	316.25		0.677	0.0679924	0.530332	81.4334	290
11Jul2017 14:13:58'	0.52225	0.135911	0.227256	217.095	598		0.64125	0.094154	0.530332	84.4411	307
11Jul2017 14:23:58'	0.44025	0.214897	0.227256	219.002	816.5		0.60575	0.123578	0.530332	86.4273	331.75
11Jul2017 14:33:58'	0.36725	0.281982	0.227256	222.815	998.5		0.570375	0.151563	0.530332	88.7539	364.875
11Jul2017 14:43:57'	0.31125	0.338389	0.227256	222.543	1148.25		0.5405	0.175558	0.530332	90.6266	402.625
11Jul2017 14:53:57'	0.34125	0.326821	0.227256	210.83	1020.5		0.5395	0.178267	0.530332	90.1159	403.75
11Jul2017 15:03:57'	0.361	0.298937	0.227256	216.006	950.75		0.5415	0.173309	0.530332	90.9671	400.625
11Jul2017 15:13:57'	0.3665	0.293484	0.227256	216.006	899.5		0.540375	0.172675	0.530332	91.5346	403.375
11Jul2017 15:23:58'	0.37425	0.281051	0.227256	219.002	852		0.541375	0.170002	0.530332	92.0453	407.625
11Jul2017 15:33:58'	0.38075	0.270176	0.227256	221.726	806.5		0.54525	0.153554	0.530332	96.0744	408
11Jul2017 15:43:58'	0.38725	0.260688	0.227256	223.633	762.25		0.555875	0.130573	0.530332	99.99	401.125
11Jul2017 15:53:57'	0.4005	0.244782	0.227256	225.267	716		0.5675	0.108895	0.530332	103.111	389.375
11Jul2017 16:03:57'	0.41375	0.232713	0.227256	224.45	674.5		0.57875	0.0890878	0.530332	105.778	378.125
11Jul2017 16:13:57'	0.44125	0.208795	0.227256	222.271	604.75		0.594375	0.073531	0.530332	105.722	353.125
11Jul2017 16:23:57'	0.456	0.19746	0.227256	220.092	566		0.60025	0.0679032	0.530332	105.665	359.5
11Jul2017 16:33:58'	0.49225	0.167768	0.227256	216.006	511.5		0.614625	0.0550105	0.530332	105.211	358.125
11Jul2017 16:43:58'	0.52275	0.142525	0.227256	212.737	459.75		0.632375	0.0389933	0.530332	104.7	348.875
11Jul2017 16:53:58'	0.549	0.119985	0.227256	210.286	429.75		0.645875	0.0283426	0.530332	103.792	348.125
11Jul2017 17:03:58'	0.59625	0.0848388	0.227256	202.659	342.75		0.6695	0.013643	0.530332	101.068	289.5
11Jul2017 17:13:57'	0.62	0.0656509	0.227256	199.662	300.5		0.681625	0.00536333	0.530332	99.9333	255.375
11Jul2017 17:23:57'	0.6315	0.0562697	0.227256	198.3	274.5		0.68075	0.00541074	0.530332	100.274	243.625
11Jul2017 17:33:57'	0.646	0.0491248	0.227256	193.67	234		0.689625	0.00227314	0.530332	98.5146	207
11Jul2017 17:43:58'	0.65075	0.0452217	0.227256	193.125	225.75		0.69325	0.001121	0.530332	97.7201	195.375
11Jul2017 17:53:58'	0.663	0.0406587	0.227256	188.222	191		0.70175	0.00175199	0.530332	96.0177	163.5
11Jul2017 18:03:58'	0.68325	0.0314413	0.227256	181.14	139.5		0.721	0.0105239	0.530332	92.7263	112.375
11Jul2017 18:13:58'	0.69425	0.0243812	0.227256	178.688	120		0.73075	0.0159035	0.530332	91.4211	94
11Jul2017 18:23:57'	0.70475	0.0198846	0.227256	174.875	96.5		0.738625	0.0202441	0.530332	90.3429	77.25
11Jul2017 18:33:57'	0.71525	0.0138911	0.227256	172.151	80.75		0.746875	0.0256267	0.530332	89.4349	67.375
11Jul2017 18:43:57'	0.72425	0.00758748	0.227256	170.516	70.5		0.75375	0.0306347	0.530332	88.8674	59
11Jul2017 18:53:57'	0.73375	0.003506	0.227256	166.975	57		0.760625	0.0349712	0.530332	88.0729	50.25
11Jul2017 19:03:58'	0.74575	0.0029494	0.227256	163.434	48.25		0.76925	0.041503	0.530332	87.4487	45.75
11Jul2017 19:13:58'	0.75375	0.00709305	0.227256	160.983	41.25		0.776125	0.0464842	0.530332	86.8245	40.625
11Jul2017 19:23:58'	0.76325	0.0111634	0.227256	157.442	33.5		0.78225	0.0507666	0.530332	86.257	35.25
11Jul2017 19:33:58'	0.771	0.0145502	0.227256	154.718	26.5		0.788125	0.0550454	0.530332	85.7463	28
11Jul2017 19:43:57'	0.7785	0.0178726	0.227256	151.994	21.25		0.79275	0.0581311	0.530332	85.2355	21.5
11Jul2017 19:53:57'	0.7875	0.02444	0.227256	150.36	15.75		0.797375	0.0609071	0.530332	84.7248	14.375
11Jul2017 20:03:57'	0.799	0.0332599	0.227256	148.725	10.25		0.805	0.0654654	0.530332	83.7601	8.25
11Jul2017 20:13:58'	0.8105	0.0422581	0.227256	147.091	6.25		0.81325	0.0705605	0.530332	82.7386	4.625
11Jul2017 20:23:58'	0.8205	0.0491055	0.227256	145.184	3.5		0.8205	0.0744133	0.530332	81.6604	2.375
11Jul2017 20:33:58'	0.82875	0.0522007	0.227256	141.915	2		0.82725	0.0771611	0.530332	80.3552	1
11Jul2017 20:43:58'	0.83375	0.0526209	0.227256	138.919	1		0.832	0.076989	0.530332	78.823	0.375
11Jul2017 20:53:57'	0.8385	0.0518396	0.227256	135.378	0.5		0.83575	0.0754791	0.530332	77.1773	0.125
11Jul2017 21:03:57'	0.84175	0.0504485	0.227256	132.382	0		0.839	0.0734849	0.530332	75.5316	0
11Jul2017 21:13:57'	0.8435	0.0483525	0.227256	129.93	0.25		0.840875	0.0714805	0.530332	74.3399	0.125
11Jul2017 21:23:58'	0.8445	0.0462804	0.227256	128.024	0.5		0.84175	0.0698853	0.530332	73.6022	0.125
11Jul2017 21:33:58'	0.84475	0.0445382	0.227256	126.934	0.5		0.84175	0.0686538	0.530332	73.205	0.25
11Jul2017 21:43:58'	0.84425	0.0436758	0.227256	126.662	0.25		0.84125	0.0673559	0.530332	72.978	0.375
11Jul2017 21:53:58'	0.8445	0.0326424	0.227256	125.844	0.5		0.841	0.0500026	0.530332	72.524	0.25
11Jul2017 22:03:57'	0.845	0.0214039	0.227256	124.21	0.25		0.8405	0.0330011	0.530332	72.07	0.375
11Jul2017 22:13:57'	0.8445	0.0105699	0.227256	122.576	0.5		0.84	0.0161999	0.530332	71.4458	0.375
11Jul2017 22:23:57'	0.84425	0	0.227256	119.579	0.5		0.83925	0	0.530332	70.7648	0.375
11Jul2017 22:33:57'	0.84275	0	0.227256	117.673	0.5		0.8385	0	0.530332	70.1406	0.5
11Jul2017 22:43:58'	0.8415	0	0.227256	116.583	0.5		0.83725	0	0.530332	69.7433	0.375
11Jul2017 22:53:58'	0.84075	0	0.227256	114.404	0.5		0.8365	0	0.530332	69.3461	0.375
11Jul2017 23:03:58'	0.83975	0	0.227256	115.766	0.5		0.836125	0	0.530332	69.2326	0.25
11Jul2017 23:13:58'	0.8395	0	0.227256	116.038	0.25		0.83525	0	0.530332	69.2893	0.125
11Jul2017 23:23:57'	0.83875	0	0.227256	117.4	0.25		0.835	0	0.530332	69.2893	0.125
11Jul2017 23:33:57'	0.83875	0	0.227256	119.035	0.25		0.834375	0	0.530332	69.4596	0.125
11Jul2017 23:43:57'	0.839	0	0.227256	117.128	0.5		0.833875	0	0.530332	69.2326	0.25
11Jul2017 23:53:58'	0.83925	0	0.227256	116.038	0.75		0.83375	0	0.530332	69.0056	0.375
12Jul2017 00:03:58'	0.83925	0	0.227256	114.676	1		0.833375	0	0.530332	68.7786	0.5
12Jul2017 00:13:58'	0.83925	0	0.227256	113.314	0.75		0.833375	0	0.530332	68.4381	0.375
12Jul2017 00:23:58'	0.83875	0	0.227256	112.497	0.75		0.83275	0	0.530332	68.3246	0.375
12Jul2017 00:33:57'	0.8385	0	0.227256	109.501	0.5		0.832375	0	0.530332	67.9274	0.25
12Jul2017 00:43:57'	0.83825	0	0.227256	103.508	0.25		0.83175	0	0.530332	67.1897	0.25
12Jul2017 00:53:57'	0.83725	0.0205823	0.31543	96.687	0.25		0.830375	0.00338629	0.523128	66.3863	0.25
12Jul2017 01:03:58'	0.83825	0.0336385	0.403603	87.6881	0.25		0.8295	0.00540527	0.515925	65.1293	0.25
12Jul2017 01:13:58'	0.83775	0.0426512	0.491776	79.7794	0.25		0.828875	0.00575621	0.508721	63.3619	0.375
12Jul2017 01:23:58'	0.838	0.0495638	0.579949	72.9607	0.25		0.828875	0.00476595	0.501518	61.311	0.375
12Jul2017 01:33:58'	0.839	0.0363137	0.579949	68.0604	0.25		0.8295	0.00209403	0.501518	60.12	0.5
12Jul2017 01:43:57'	0.83875	0.0289489	0.579949	65.6102	0		0.829875	8.96282e-05	0.501518	59.1558	0.5
12Jul2017 01:53:57'	0.83825	0.0259355	0.579949	64.7935	0.25		0.829625	0.000260701	0.501518	59.3827	0.5
12Jul2017 02:03:57'	0.83975	0.022726	0.579949	63.16	0.5		0.8295	0.000826583	0.501518	59.6663	0.375
12Jul2017 02:13:57'	0.8395	0.0193426	0.579949	62.0711	0.75		0.82925	0.000536783	0.501518	59.6095	0.375
12Jul2017 02:23:58'	0.83975	0.0196833	0.579949	62.0711	0.75		0.828875	0.00361038	0.501518	60.8573	0.375
12Jul2017 02:33:58'	0.843	0.0189708	0.579949	60.7098	0.5		0.82825	0.0068281	0.501518	62.1618	0.375
12Jul2017 02:43:58'	0.8415	0.0157905	0.579949	60.1654	0.5		0.8275	0.00740232	0.501518	62.5588	0.375
12Jul2017 02:53:58'	0.8425	0.0121007	0.579949	58.5319	0.5		0.826875	0.00550389	0.501518	62.1051	0.375
12Jul2017 03:03:57'	0.8425	0.00658176	0.579949	56.6262	0.5		0.8265	0.0013862	0.501518	60.6872	0.25
12Jul2017 03:13:57'	0.84075	0.00168259	0.579949	55.5373	0.5		0.82675	0.00354914	0.501518	58.9289	0.125
12Jul2017 03:23:57'	0.842	0.000551779	0.579949	54.7205	0.25		0.826875	0.0055772	0.501518	58.1916	0.125
12Jul2017 03:33:58'	0.8405	0.000209839	0.579949	54.9928	0.25		0.826875	0.00564955	0.501518	58.1349	0
12Jul2017 03:43:58'	0.842	0.00107408	0.579949	54.1761	0.25		0.827	0.00549953	0.501518	58.2483	0
12Jul2017 03:53:58'	0.842	0.00170123	0.579949	53.9038	0.25		0.8265	0.00518136	0.501518	58.4752	0
12Jul2017 04:03:58'	0.842	0.000958118	0.579949	54.1761	0.5		0.825875	0.00295644	0.501518	59.5528	0.125
12Jul2017 04:13:57'	0.84225	0.000699441	0.579949	54.1761	0.25		0.825125	0.00111583	0.501518	60.517	0.125
12Jul2017 04:23:57'	0.841	0.000461632	0.579949	54.7205	0.5		0.824375	0.000514627	0.501518	61.4245	0.25
12Jul2017 04:33:57'	0.84125	0.000335485	0.579949	54.7205	0.5		0.82425	0.0021823	0.501518	62.1618	0.375
12Jul2017 04:43:58'	0.84175	0.000459481	0.579949	54.4483	0.5		0.824	0.00330156	0.501518	62.6723	0.375
12Jul2017 04:53:58'	0.84325	0.000450445	0.579949	53.9038	0.75		0.824125	0.00475253	0.501518	63.1827	0.5
12Jul2017 05:03:58'	0.8435	0.000664945	0.579949	54.1761	0.75		0.8235	0.00735074	0.501518	64.317	0.375
12Jul2017 05:13:58'	0.84225	0.00194722	0.579949	54.9928	0.75		0.822	0.0100496	0.501518	65.6215	0.375
12Jul2017 05:23:57'	0.83925	0.00352897	0.579949	56.6262	0.5		0.8205	0.0123124	0.501518	66.7559	0.25
12Jul2017 05:33:57'	0.8365	0.00535678	0.579949	58.2597	0		0.817	0.0145326	0.501518	68.5708	0.125
12Jul2017 05:43:57'	0.8315	0.0043674	0.579949	59.6209	0.75		0.811625	0.0141052	0.501518	69.9887	0.25
12Jul2017 05:53:57'	0.82075	0.00247454	0.579949	60.9821	2.5		0.804625	0.0112291	0.501518	71.4634	1.75
12Jul2017 06:03:58'	0.80575	0.0151537	0.579949	61.7988	6		0.79375	0.00483919	0.501518	73.1649	4.5
12Jul2017 06:13:58'	0.78775	0.0323782	0.579949	62.0711	10		0.782	0.00336099	0.501518	74.4127	7.75
12Jul2017 06:23:58'	0.77075	0.0470621	0.579949	62.8878	15		0.77	0.010432	0.501518	76.0575	11.875
12Jul2017 06:33:58'	0.75925	0.0594614	0.579949	62.6155	19.25		0.758375	0.0190201	0.501518	76.8515	15.5
12Jul2017 06:43:57'	0.75	0.0685576	0.579949	62.6155	23.5		0.75	0.0258414	0.501518	77.0784	19.125
12Jul2017 06:53:57'	0.743	0.0731271	0.579949	63.4323	31.25		0.741875	0.0346395	0.501518	76.7948	25
12Jul2017 07:03:57'	0.72825	0.088651	0.579949	63.16	60.75		0.7275	0.0608791	0.501518	72.8813	35.875
12Jul2017 07:13:58'	0.7075	0.101474	0.579949	65.8824	97		0.71425	0.0860731	0.501518	68.8544	50.75
12Jul2017 07:23:58'	0.6895	0.0918703	0.579949	75.4109	137.5		0.7035	0.0968825	0.501518	69.0246	69.5
12Jul2017 07:33:58'	0.67975	0.0204716	0.579949	103.452	168		0.695375	0.0903726	0.501518	73.9589	88.125
12Jul2017 07:43:58'	0.67575	0.0655353	0.579949	134.487	183		0.69525	0.0664724	0.501518	82.0695	111.75
12Jul2017 07:53:57'	0.67375	0.151925	0.579949	164.978	209		0.69475	0.0403979	0.501518	91.0875	141.25
12Jul2017 08:03:57'	0.6715	0.212061	0.579949	186.485	218.5		0.686375	0.0298567	0.501518	97.4965	149.625
12Jul2017 08:13:57'	0.67025	0.212407	0.579949	187.03	217		0.68325	0.0302618	0.501518	98.404	145.375
12Jul2017 08:23:58'	0.67125	0.207721	0.579949	185.124	215.75		0.681375	0.0304042	0.501518	99.0846	131.875
12Jul2017 08:33:58'	0.68425	0.209638	0.579949	181.313	183.5		0.682875	0.0282813	0.501518	99.4816	104.875
12Jul2017 08:43:58'	0.6685	0.196801	0.579949	182.402	174.25		0.682875	0.0288314	0.501518	99.3681	121.5
12Jul2017 08:53:58'	0.6585	0.185986	0.579949	182.13	188.5		0.677375	0.031642	0.501518	100.446	148.25
12Jul2017 09:03:57'	0.62425	0.186353	0.579949	194.108	249.5		0.6695	0.0352425	0.501518	102.147	193.125
12Jul2017 09:13:57'	0.57275	0.175241	0.579949	207.992	338.5		0.65725	0.0418361	0.501518	104.303	247.25
12Jul2017 09:23:57'	0.55125	0.175967	0.579949	215.615	419		0.652125	0.0428433	0.501518	105.891	272.625
12Jul2017 09:33:57'	0.5135	0.171312	0.579949	227.049	506		0.645	0.0447394	0.501518	107.762	301.625
12Jul2017 09:43:58'	0.50925	0.150627	0.579949	221.332	502.75		0.6375	0.0461175	0.501518	109.577	298.125
12Jul2017 09:53:58'	0.49525	0.126179	0.579949	217.793	544.5		0.625375	0.0547365	0.501518	110.428	299.125
12Jul2017 10:03:58'	0.479	0.105971	0.579949	216.432	585.75		0.6115	0.065024	0.501518	111.279	282.875
12Jul2017 10:13:58'	0.472	0.0966941	0.579949	215.615	586.75		0.600125	0.0741598	0.501518	111.789	275.25
12Jul2017 10:23:57'	0.43875	0.0587945	0.579949	213.982	670.75		0.578625	0.0955133	0.501518	111.903	293.875
12Jul2017 10:33:57'	0.4255	0.0432008	0.579949	213.165	698.5		0.561875	0.108564	0.501518	113.321	313.125
12Jul2017 10:43:57'	0.40275	0.00703686	0.579949	208.537	722.25		0.544625	0.124886	0.501518	113.774	349.125
12Jul2017 10:53:58'	0.34925	0.0684205	0.579949	200.914	828.5		0.519125	0.151775	0.501518	113.547	397.75
12Jul2017 11:03:58'	0.37825	0.0317117	0.579949	203.637	759		0.5295	0.141379	0.501518	113.434	378.25
12Jul2017 11:13:58'	0.426	0.00429203	0.579949	199.553	657.75		0.5485	0.126165	0.501518	112.073	333.375
12Jul2017 11:23:58'	0.4665	0.0486606	0.579949	200.914	566		0.559625	0.114085	0.501518	112.526	289.875
12Jul2017 11:33:57'	0.555	0.134576	0.579949	200.097	370.25		0.599125	0.077318	0.501518	111.392	202
12Jul2017 11:43:57'	0.57875	0.149827	0.579949	197.103	321.25		0.61625	0.0635541	0.501518	110.485	174.625
12Jul2017 11:53:57'	0.59425	0.153538	0.579949	193.019	286.75		0.628375	0.0538312	0.501518	109.747	156.5
12Jul2017 12:03:58'	0.62275	0.174148	0.579949	190.297	258.75		0.64775	0.0377261	0.501518	108.613	150.375
12Jul2017 12:13:58'	0.57275	0.192787	0.579949	213.982	359		0.639375	0.0386585	0.501518	111.052	183.5
12Jul2017 12:23:58'	0.4845	0.0886149	0.579949	208.537	588.75		0.620875	0.054921	0.501518	111.562	236.75
12Jul2017 12:33:58'	0.4355	0.0504768	0.579949	212.348	690.75		0.602125	0.0708274	0.501518	112.356	268.375
12Jul2017 12:43:57'	0.34225	0.0520937	0.579949	209.081	899.75		0.572875	0.100354	0.501518	112.073	301.375
12Jul2017 12:53:57'	0.29475	0.176848	0.579949	182.402	1050.25		0.55075	0.128311	0.501518	110.144	321.625
12Jul2017 13:03:57'	0.3535	0.101413	0.579949	188.119	874.25		0.554875	0.126922	0.501518	109.18	287.625
12Jul2017 13:13:57'	0.359	0.0959068	0.579949	188.119	845.5		0.548375	0.131987	0.501518	109.804	288.375
12Jul2017 13:23:58'	0.419	0.0225544	0.579949	192.747	682		0.5645	0.115671	0.501518	109.804	275
12Jul2017 13:33:58'	0.44	0.00141236	0.579949	192.747	698.75		0.5595	0.122517	0.501518	109.237	301
12Jul2017 13:43:58'	0.415	0.0415587	0.579949	187.574	733.75		0.54675	0.135815	0.501518	109.237	318.25
12Jul2017 13:53:58'	0.433	0.034408	0.579949	183.763	686.5		0.56	0.126357	0.501518	107.932	298
12Jul2017 14:03:57'	0.46275	0.00866939	0.579949	182.402	637.25		0.57225	0.115755	0.501518	107.535	271.375
12Jul2017 14:13:57'	0.55425	0.0843689	0.579949	182.946	355		0.611875	0.0786913	0.501518	106.741	183.25
12Jul2017 14:23:57'	0.62275	0.158506	0.579949	184.852	246.5		0.644625	0.048669	0.501518	105.947	139
12Jul2017 14:33:58'	0.648	0.18691	0.579949	185.941	228.75		0.657375	0.0375228	0.501518	105.494	129.25
12Jul2017 14:43:58'	0.66	0.18808	0.579949	182.13	206.75		0.66425	0.0337458	0.501518	104.586	116.25
12Jul2017 14:53:58'	0.66775	0.195617	0.579949	182.13	206.5		0.66975	0.0296042	0.501518	104.132	121.875
12Jul2017 15:03:58'	0.65175	0.200746	0.579949	189.48	246		0.666625	0.0285603	0.501518	105.323	141.875
12Jul2017 15:13:57'	0.64725	0.196776	0.579949	189.752	244.25		0.666375	0.0295441	0.501518	105.04	140.5
12Jul2017 15:23:57'	0.654	0.199228	0.579949	188.391	228		0.670625	0.0278113	0.501518	104.076	134.375
12Jul2017 15:33:57'	0.6455	0.203662	0.579949	192.747	242.5		0.671875	0.0258078	0.501518	104.303	137.5
12Jul2017 15:43:58'	0.64975	0.195272	0.579949	188.391	226.25		0.667625	0.0303583	0.501518	104.076	128.25
12Jul2017 15:53:58'	0.653	0.1971	0.579949	187.847	214.5		0.671125	0.0266257	0.501518	103.962	122.125
12Jul2017 16:03:58'	0.6545	0.202753	0.579949	189.208	221.25		0.673	0.0247388	0.501518	104.019	124.125
12Jul2017 16:13:58'	0.6555	0.197394	0.579949	187.03	216		0.673	0.0258889	0.501518	103.792	116.25
12Jul2017 16:23:57'	0.67025	0.202188	0.579949	183.491	186		0.685625	0.019803	0.501518	101.807	102.375
12Jul2017 16:33:57'	0.633	0.205163	0.579949	197.375	273		0.673375	0.0230715	0.501518	104.132	163
12Jul2017 16:43:57'	0.59875	0.192224	0.579949	204.726	352.75		0.65725	0.0317912	0.501518	106.004	222.875
12Jul2017 16:53:57'	0.58325	0.188439	0.579949	208.809	399.25		0.64725	0.0371607	0.501518	107.082	271
12Jul2017 17:03:58'	0.57475	0.187081	0.579949	211.259	436.25		0.639625	0.0414031	0.501518	107.876	313.5
12Jul2017 17:13:58'	0.61375	0.182639	0.579949	196.286	357.25		0.65175	0.0395169	0.501518	105.04	290.875
12Jul2017 17:23:58'	0.64225	0.193735	0.579949	190.297	298		0.663625	0.0332618	0.501518	103.452	271.875
12Jul2017 17:33:58'	0.66225	0.195661	0.579949	184.035	254.75		0.674	0.028005	0.501518	101.977	254.5
12Jul2017 17:43:57'	0.67175	0.190827	0.579949	179.135	216		0.68025	0.0249265	0.501518	101.07	231.375
12Jul2017 17:53:57'	0.6825	0.193826	0.579949	176.412	198		0.686375	0.0223644	0.501518	99.992	215.5
12Jul2017 18:03:57'	0.68825	0.193974	0.579949	174.507	176.25		0.693375	0.0191235	0.501518	98.8577	188.125
12Jul2017 18:13:58'	0.6915	0.194702	0.579949	173.69	162.5		0.698375	0.0163082	0.501518	98.1204	169.125
12Jul2017 18:23:58'	0.69925	0.199189	0.579949	172.601	150		0.70475	0.012232	0.501518	97.4398	149.875
12Jul2017 18:33:58'	0.704	0.201482	0.579949	171.784	138		0.70975	0.00870274	0.501518	96.986	128.75
12Jul2017 18:43:58'	0.7125	0.20368	0.579949	169.606	128.5		0.715375	0.00349523	0.501518	96.986	124.25
12Jul2017 18:53:57'	0.7185	0.204993	0.579949	167.973	116.5		0.719375	4.28059e-05	0.501518	96.9293	114.5
12Jul2017 19:03:57'	0.724	0.208352	0.579949	167.156	104.5		0.724125	0.00375927	0.501518	96.7024	105.75
12Jul2017 19:13:57'	0.7305	0.210898	0.579949	165.795	92.25		0.729125	0.00687719	0.501518	96.1353	97
12Jul2017 19:23:58'	0.735	0.210061	0.579949	163.889	83		0.733	0.00887677	0.501518	95.5114	87
12Jul2017 19:33:58'	0.7405	0.210847	0.579949	162.256	72.25		0.738	0.0113432	0.501518	94.6606	75.875
12Jul2017 19:43:58'	0.747	0.209078	0.579949	159.534	63.75		0.744125	0.0137687	0.501518	93.4129	67
12Jul2017 19:53:58'	0.755	0.20758	0.579949	156.267	51.25		0.75275	0.0179695	0.501518	91.9382	52
12Jul2017 20:03:57'	0.76475	0.205495	0.579949	152.183	36.25		0.764375	0.022979	0.501518	89.783	34.75
12Jul2017 20:13:57'	0.778	0.202062	0.579949	146.466	23.25		0.778375	0.0291574	0.501518	87.3441	20.875
12Jul2017 20:23:57'	0.79525	0.20508	0.579949	141.566	13		0.794875	0.0380947	0.501518	85.0187	11
12Jul2017 20:33:57'	0.81275	0.206756	0.579949	136.121	6.25		0.809625	0.0456666	0.501518	82.8068	5.25
12Jul2017 20:43:58'	0.8275	0.208859	0.579949	131.765	2.25		0.82175	0.0508328	0.501518	80.5948	2
12Jul2017 20:53:58'	0.83925	0.208088	0.579949	127.409	0.25		0.829625	0.0528906	0.501518	78.6664	0.5
12Jul2017 21:03:58'	0.8435	0.198539	0.579949	122.509	0.25		0.83325	0.0503135	0.501518	76.6813	0.125
12Jul2017 21:13:58'	0.8455	0.187888	0.579949	118.153	0.25		0.835125	0.0471263	0.501518	75.0933	0
12Jul2017 21:23:57'	0.8455	0.175379	0.579949	113.797	0.5		0.836125	0.0440529	0.501518	73.8455	0
12Jul2017 21:33:57'	0.8445	0.168169	0.579949	111.619	0.5		0.836375	0.0419344	0.501518	73.1082	0
12Jul2017 21:43:57'	0.84425	0.146554	0.579949	104.268	0.5		0.835625	0.0393953	0.501518	72.4843	0.125
12Jul2017 21:53:58'	0.8445	0.103902	0.579949	96.6457	0.5		0.83525	0.0287193	0.501518	72.0306	0.25
12Jul2017 22:03:58'	0.8455	0.0648769	0.579949	91.2009	0.5		0.8345	0.0185791	0.501518	71.9171	0.25
12Jul2017 22:13:58'	0.84625	0.0233933	0.579949	83.5781	0.25		0.834125	0.00840876	0.501518	71.5201	0.375
12Jul2017 22:23:58'	0.84625	0	0.579949	81.6724	0.25		0.8345	0	0.501518	71.35	0.375
12Jul2017 22:33:57'	0.84525	0	0.579949	80.3112	0.5		0.8345	0	0.501518	71.0664	0.25
12Jul2017 22:43:57'	0.84475	0	0.579949	76.7721	0.25		0.834125	0	0.501518	70.6694	0.25
12Jul2017 22:53:57'	0.844	0	0.579949	75.4109	0.25		0.833625	0	0.501518	70.7261	0.25
12Jul2017 23:03:58'	0.84425	0	0.579949	73.7774	0.25		0.833	0	0.501518	70.8395	0.25
12Jul2017 23:13:58'	0.8455	0	0.579949	71.8718	0.25		0.83175	0	0.501518	70.8395	0.375
12Jul2017 23:23:58'	0.84625	0	0.579949	69.4216	0.25		0.831125	0	0.501518	70.329	0.5
12Jul2017 23:33:58'	0.84675	0	0.579949	65.6102	0.25		0.831125	0	0.501518	68.6275	0.375
12Jul2017 23:43:57'	0.84625	0	0.579949	62.8878	0.25		0.830375	0	0.501518	67.3798	0.25
12Jul2017 23:53:57'	0.8455	0	0.579949	60.7098	0.25		0.83025	0	0.501518	66.4723	0.25
13Jul2017 00:03:57'	0.845	0	0.579949	59.6209	0.5		0.830125	0	0.501518	65.6215	0.125
13Jul2017 00:13:57'	0.8445	0	0.579949	59.0764	0.75		0.82925	0	0.501518	65.735	0.25
13Jul2017 00:23:58'	0.84425	0	0.579949	58.2597	0.75		0.82925	0	0.501518	64.9409	0.25
13Jul2017 00:33:58'	0.845	0	0.579949	57.1707	0.75		0.828875	0	0.501518	64.4305	0.125
13Jul2017 00:43:58'	0.8445	0	0.579949	57.1707	0.5		0.828125	0	0.501518	65.0544	0.125
13Jul2017 00:53:58'	0.84475	0.00611166	0.58507	57.4349	0.5		0.827875	0.00132379	0.489697	66.0091	0
13Jul2017 01:03:57'	0.8445	0.0119854	0.590192	57.9712	0.5		0.827125	0.00247316	0.477877	67.5311	0
13Jul2017 01:13:57'	0.84325	0.0141397	0.595313	57.6915	0.5		0.827	0.000514849	0.466057	67.1821	0.125
13Jul2017 01:23:57'	0.84275	0.0168318	0.600434	57.1394	0.75		0.827125	0.002699	0.454236	65.699	0.125
13Jul2017 01:33:58'	0.8425	0.0132488	0.600434	56.0511	0.5		0.8265	0.00674836	0.454236	64.2819	0.25
13Jul2017 01:43:58'	0.84375	0.0102544	0.600434	54.6906	0.5		0.82625	0.0101805	0.454236	62.9781	0.25
13Jul2017 01:53:58'	0.84475	0.0122296	0.600434	54.9627	0.5		0.825875	0.00862687	0.454236	63.8284	0.125
13Jul2017 02:03:58'	0.84575	0.0150989	0.600434	55.5069	0.25		0.82475	0.00347272	0.454236	66.3226	0.125
13Jul2017 02:13:57'	0.8455	0.018891	0.600434	56.8673	0.5		0.8245	0.00136005	0.454236	68.3066	0.125
13Jul2017 02:23:57'	0.845	0.0233271	0.600434	58.4999	0.75		0.823625	0.00580532	0.454236	70.404	0.25
13Jul2017 02:33:57'	0.84275	0.0258539	0.600434	60.1325	0.75		0.823	0.0078247	0.454236	71.3676	0.375
13Jul2017 02:43:58'	0.84125	0.0243456	0.600434	60.1325	1		0.82275	0.00725856	0.454236	71.1409	0.5
13Jul2017 02:53:58'	0.84075	0.0204703	0.600434	59.0441	0.75		0.822125	0.00569632	0.454236	70.6307	0.375
13Jul2017 03:03:58'	0.83925	0.0148403	0.600434	57.6836	0.75		0.822125	0.00414386	0.454236	69.8938	0.375
13Jul2017 03:13:58'	0.84	0.00917891	0.600434	55.5069	0.5		0.822	0.00242411	0.454236	69.2135	0.375
13Jul2017 03:23:57'	0.84125	0.00545303	0.600434	53.8743	0.25		0.822	0.000401187	0.454236	68.3633	0.375
13Jul2017 03:33:57'	0.84325	0.00332637	0.600434	52.5139	0.5		0.822125	0.00086639	0.454236	67.8531	0.5
13Jul2017 03:43:57'	0.84425	0.00184341	0.600434	51.6976	0.25		0.8225	0.00209083	0.454236	67.2862	0.5
13Jul2017 03:53:57'	0.84525	0.000275859	0.600434	50.8813	0.25		0.82175	0.0032638	0.454236	67.0595	0.5
13Jul2017 04:03:58'	0.84425	0.000902443	0.600434	50.8813	0.25		0.82125	0.0036625	0.454236	67.1162	0.375
13Jul2017 04:13:58'	0.84175	0.00248356	0.600434	51.1534	0.25		0.821	0.00431984	0.454236	66.9461	0.375
13Jul2017 04:23:58'	0.8415	0.00353717	0.600434	50.8813	0.5		0.81975	0.00427156	0.454236	67.3996	0.375
13Jul2017 04:33:58'	0.841	0.00315395	0.600434	51.1534	0.75		0.819625	0.00218784	0.454236	68.3066	0.375
13Jul2017 04:43:57'	0.8395	0.00209138	0.600434	51.9697	0.75		0.81925	0.000130102	0.454236	69.4403	0.5
13Jul2017 04:53:57'	0.84075	0.000887817	0.600434	51.9697	0.75		0.81825	0.00271058	0.454236	70.9141	0.5
13Jul2017 05:03:57'	0.8405	0.00022972	0.600434	52.2418	0.75		0.817375	0.00419944	0.454236	71.8211	0.5
13Jul2017 05:13:58'	0.838	0.000241782	0.600434	53.0581	0.75		0.815875	0.00410379	0.454236	72.2746	0.5
13Jul2017 05:23:58'	0.838	0.00140026	0.600434	53.6022	0.75		0.813875	0.00443634	0.454236	73.0115	0.5
13Jul2017 05:33:58'	0.833	0.00401998	0.600434	56.0511	0.25		0.810375	0.00514904	0.454236	74.2586	0.25
13Jul2017 05:43:58'	0.8255	0.00303837	0.600434	58.2278	0.75		0.804875	0.00498471	0.454236	76.1859	0.25
13Jul2017 05:53:57'	0.8145	0.00313917	0.600434	59.8604	2.75		0.79675	0.00196214	0.454236	78.0566	1.75
13Jul2017 06:03:57'	0.79975	0.0169661	0.600434	60.1325	6		0.78525	0.00844677	0.454236	78.3967	4.375
13Jul2017 06:13:57'	0.78075	0.036132	0.600434	60.1325	10.5		0.77225	0.0230877	0.454236	77.9432	8
13Jul2017 06:23:58'	0.76075	0.0543158	0.600434	60.6766	16.25		0.758375	0.0415915	0.454236	76.1292	13
13Jul2017 06:33:58'	0.7455	0.0694688	0.600434	60.6766	23		0.74575	0.0636903	0.454236	72.5013	18.625
13Jul2017 06:43:58'	0.72925	0.0825301	0.600434	61.765	30.5		0.735125	0.0838544	0.454236	68.8167	24.875
13Jul2017 06:53:58'	0.7205	0.0895966	0.600434	62.3092	38.75		0.722625	0.106527	0.454236	64.9054	32.375
13Jul2017 07:03:57'	0.71	0.0959716	0.600434	63.6697	60.5		0.711875	0.125902	0.454236	61.7877	41.375
13Jul2017 07:13:57'	0.69825	0.0978403	0.600434	66.9348	80.75		0.70225	0.13814	0.454236	60.9374	52.375
13Jul2017 07:23:57'	0.6875	0.0952326	0.600434	71.2883	103.25		0.69375	0.143341	0.454236	62.5246	69.25
13Jul2017 07:33:57'	0.675	0.0837057	0.600434	79.1789	125.25		0.691625	0.126081	0.454236	70.404	91.75
13Jul2017 07:43:58'	0.66825	0.0423565	0.600434	94.9603	136.5		0.68975	0.0972628	0.454236	82.2513	112.625
13Jul2017 07:53:58'	0.6605	0.0154532	0.600434	116.456	155.75		0.688	0.0683852	0.454236	94.1554	113.625
13Jul2017 08:03:58'	0.645	0.0628914	0.600434	137.135	181		0.684375	0.0439451	0.454236	104.926	131.625
13Jul2017 08:13:58'	0.62725	0.105673	0.600434	156.997	212.25		0.67825	0.0359017	0.454236	110.141	139.375
13Jul2017 08:23:57'	0.604	0.117122	0.600434	168.425	248		0.67175	0.0384101	0.454236	111.728	147.75
13Jul2017 08:33:57'	0.5745	0.100778	0.600434	172.779	286.5		0.66475	0.0423455	0.454236	112.862	175.125
13Jul2017 08:43:57'	0.5555	0.086114	0.600434	174.139	316.75		0.66025	0.0438224	0.454236	114.052	175
13Jul2017 08:53:58'	0.5285	0.0625573	0.600434	175.228	349		0.654	0.0463958	0.454236	115.809	185.375
13Jul2017 09:03:58'	0.51	0.0399174	0.600434	173.867	380.25		0.64975	0.0494946	0.454236	116.263	196.125
13Jul2017 09:13:58'	0.49375	0.0220933	0.600434	173.323	409.25		0.64675	0.0509524	0.454236	116.886	193.25
13Jul2017 09:23:58'	0.4715	0.00968147	0.600434	176.588	448.25		0.643	0.0530398	0.454236	117.397	195
13Jul2017 09:33:57'	0.4525	0.017751	0.600434	173.867	496.5		0.639125	0.0557603	0.454236	117.567	195.75
13Jul2017 09:43:57'	0.43625	0.0380182	0.600434	172.507	537.5		0.633125	0.059898	0.454236	117.963	190.875
13Jul2017 09:53:57'	0.414	0.0519054	0.600434	175.228	562.5		0.621875	0.0679105	0.454236	119.211	198.5
13Jul2017 10:03:58'	0.398	0.0836582	0.600434	170.058	596.75		0.602	0.0846562	0.454236	120.288	237.75
13Jul2017 10:13:58'	0.407	0.0745819	0.600434	170.058	580.75		0.59025	0.0950969	0.454236	120.514	252
13Jul2017 10:23:58'	0.37875	0.109483	0.600434	167.881	611.25		0.574	0.109404	0.454236	121.138	263.125
13Jul2017 10:33:58'	0.37425	0.136416	0.600434	160.535	635.75		0.559625	0.124272	0.454236	120.571	289.5
13Jul2017 10:43:57'	0.367	0.152049	0.600434	157.814	664.5		0.555125	0.128911	0.454236	120.231	292.5
13Jul2017 10:53:57'	0.3275	0.211505	0.600434	151.283	762.5		0.53975	0.14545	0.454236	119.494	326.625
13Jul2017 11:03:57'	0.33575	0.209057	0.600434	149.379	764.75		0.535125	0.151761	0.454236	118.757	344.25
13Jul2017 11:13:57'	0.32175	0.232233	0.600434	146.386	808.75		0.532125	0.156907	0.454236	117.737	350
13Jul2017 11:23:58'	0.319	0.235816	0.600434	146.114	802.25		0.5325	0.158951	0.454236	116.603	334.25
13Jul2017 11:33:58'	0.33175	0.218117	0.600434	147.746	765.5		0.53875	0.153153	0.454236	116.376	299.875
13Jul2017 11:43:58'	0.34125	0.206148	0.600434	148.563	756		0.54675	0.145292	0.454236	116.263	281
13Jul2017 11:53:58'	0.34175	0.212296	0.600434	146.386	808.25		0.55525	0.138362	0.454236	115.979	267.25
13Jul2017 12:03:57'	0.369	0.179226	0.600434	148.29	762.25		0.563375	0.131192	0.454236	115.866	252.25
13Jul2017 12:13:57'	0.3965	0.14658	0.600434	149.923	728.75		0.5785	0.118479	0.454236	115.186	239.625
13Jul2017 12:23:57'	0.43225	0.102636	0.600434	152.644	668.5		0.590125	0.109009	0.454236	114.619	228.125
13Jul2017 12:33:58'	0.46575	0.0524502	0.600434	158.086	557.75		0.5905	0.105268	0.454236	115.753	216.375
13Jul2017 12:43:58'	0.4495	0.0768664	0.600434	155.365	651		0.583625	0.113102	0.454236	115.413	235.875
13Jul2017 12:53:58'	0.47525	0.045453	0.600434	157.27	585		0.58775	0.112186	0.454236	114.336	223.5
13Jul2017 13:03:58'	0.447	0.0735977	0.600434	157.27	695.25		0.581	0.11641	0.454236	115.016	239.875
13Jul2017 13:13:57'	0.4075	0.125605	0.600434	153.188	868.5		0.56925	0.132178	0.454236	113.769	268
13Jul2017 13:23:57'	0.4505	0.075091	0.600434	155.637	722.75		0.58825	0.117014	0.454236	112.522	232.5
13Jul2017 13:33:57'	0.38375	0.155958	0.600434	151.011	1001.75		0.567875	0.133504	0.454236	113.769	278
13Jul2017 13:43:58'	0.39425	0.151338	0.600434	149.107	912.75		0.565875	0.139784	0.454236	112.295	264.5
13Jul2017 13:53:58'	0.454	0.0766166	0.600434	154.004	697.25		0.591875	0.113284	0.454236	112.238	226.875
13Jul2017 14:03:58'	0.45075	0.0783457	0.600434	154.549	710.75		0.591	0.112309	0.454236	112.918	229.5
13Jul2017 14:13:58'	0.52775	0.0120311	0.600434	158.902	414		0.6215	0.085937	0.454236	111.445	174
13Jul2017 14:23:57'	0.49975	0.0259206	0.600434	155.637	550.75		0.61575	0.0901805	0.454236	112.125	210.625
13Jul2017 14:33:57'	0.49375	0.0336962	0.600434	155.093	575.5		0.615	0.0927572	0.454236	111.275	210.875
13Jul2017 14:43:57'	0.48825	0.0382823	0.600434	155.365	610.75		0.614625	0.0931199	0.454236	111.161	217.25
13Jul2017 14:53:57'	0.44325	0.0907909	0.600434	152.916	747.25		0.6	0.105604	0.454236	111.955	259.5
13Jul2017 15:03:58'	0.50225	0.0291354	0.600434	153.732	550.5		0.623	0.0886624	0.454236	109.801	204.5
13Jul2017 15:13:58'	0.52625	0.00662153	0.600434	153.188	494.75		0.63475	0.0796074	0.454236	109.007	189.75
13Jul2017 15:23:58'	0.5455	0.0102011	0.600434	152.372	442.25		0.64325	0.0724242	0.454236	108.667	177.875
13Jul2017 15:33:58'	0.57025	0.0456459	0.600434	155.909	350.25		0.655	0.0630046	0.454236	107.817	154.25
13Jul2017 15:43:57'	0.584	0.0551249	0.600434	154.549	316.25		0.66125	0.0596588	0.454236	106.796	141
13Jul2017 15:53:57'	0.5835	0.0545337	0.600434	154.549	319.75		0.65925	0.061668	0.454236	106.853	144.25
13Jul2017 16:03:57'	0.5905	0.057135	0.600434	153.188	290.25		0.6635	0.0603442	0.454236	105.719	134.875
13Jul2017 16:13:58'	0.5955	0.0546546	0.600434	150.739	325		0.66025	0.0638249	0.454236	105.549	149.875
13Jul2017 16:23:58'	0.58975	0.053198	0.600434	152.1	348		0.65725	0.0640918	0.454236	106.343	166
13Jul2017 16:33:58'	0.583	0.0380587	0.600434	149.379	372.75		0.6545	0.0679065	0.454236	105.833	187.5
13Jul2017 16:43:58'	0.59075	0.0410675	0.600434	147.746	355.5		0.658625	0.0664532	0.454236	104.869	178.75
13Jul2017 16:53:57'	0.619	0.0603692	0.600434	144.753	259.5		0.672	0.0577592	0.454236	103.225	142.75
13Jul2017 17:03:57'	0.613	0.0566067	0.600434	145.57	313		0.669875	0.0594428	0.454236	103.565	170
13Jul2017 17:13:57'	0.63025	0.07729	0.600434	146.658	257.5		0.680125	0.0512139	0.454236	102.998	140.125
13Jul2017 17:23:57'	0.62475	0.0726011	0.600434	146.93	298		0.67725	0.0544246	0.454236	102.942	173.375
13Jul2017 17:33:58'	0.63325	0.0752221	0.600434	145.025	270.25		0.677875	0.056716	0.454236	102.035	162.125
13Jul2017 17:43:58'	0.656	0.0888903	0.600434	142.032	181.75		0.69175	0.0495948	0.454236	99.6539	112.375
13Jul2017 17:53:58'	0.671	0.0907822	0.600434	137.679	161		0.697125	0.0491422	0.454236	97.84	96.375
13Jul2017 18:03:58'	0.68525	0.0976049	0.600434	135.23	112.75		0.70625	0.0436701	0.454236	96.5929	56.25
13Jul2017 18:13:57'	0.68825	0.100622	0.600434	135.23	109.75		0.7115	0.0392012	0.454236	96.3661	50.625
13Jul2017 18:23:57'	0.69075	0.0998133	0.600434	134.142	112.75		0.715375	0.0358762	0.454236	96.1394	50.375
13Jul2017 18:33:57'	0.69375	0.102522	0.600434	134.142	104.25		0.721	0.0313476	0.454236	95.7993	47.875
13Jul2017 18:43:58'	0.70325	0.106788	0.600434	132.509	91.5		0.728875	0.0259616	0.454236	94.8923	44.5
13Jul2017 18:53:58'	0.71275	0.112902	0.600434	131.421	81.25		0.736625	0.0203146	0.454236	94.0987	40.5
13Jul2017 19:03:58'	0.721	0.11867	0.600434	130.604	68.25		0.74175	0.0169168	0.454236	93.3618	35.875
13Jul2017 19:13:58'	0.72725	0.122403	0.600434	129.788	62.5		0.745125	0.0144072	0.454236	92.965	33.25
13Jul2017 19:23:57'	0.72925	0.124421	0.600434	129.788	60.25		0.74675	0.0125654	0.454236	92.965	30.25
13Jul2017 19:33:57'	0.733	0.1248	0.600434	128.7	54		0.74925	0.0109361	0.454236	92.5682	28.125
13Jul2017 19:43:57'	0.73825	0.126669	0.600434	127.611	46.5		0.75375	0.00776088	0.454236	92.1714	24.875
13Jul2017 19:53:58'	0.74625	0.129901	0.600434	125.979	35.75		0.761625	0.00247194	0.454236	91.2644	19.875
13Jul2017 20:03:58'	0.7555	0.134317	0.600434	124.346	25.75		0.77175	0.00345286	0.454236	89.6772	14.75
13Jul2017 20:13:58'	0.768	0.140453	0.600434	122.17	16		0.7855	0.0121379	0.454236	87.8632	9
13Jul2017 20:23:58'	0.783	0.149173	0.600434	119.993	8.25		0.798625	0.0209245	0.454236	86.1626	4.625
13Jul2017 20:33:57'	0.79575	0.155945	0.600434	118.088	4.25		0.81	0.0274165	0.454236	84.3487	2.25
13Jul2017 20:43:57'	0.808	0.160578	0.600434	115.639	1.75		0.8185	0.0313945	0.454236	82.5914	0.875
13Jul2017 20:53:57'	0.8155	0.159445	0.600434	112.918	0.75		0.82325	0.0308107	0.454236	80.5507	0.375
13Jul2017 21:03:57'	0.81975	0.153626	0.600434	109.653	0.25		0.82625	0.0286608	0.454236	78.6801	0.125
13Jul2017 21:13:58'	0.82225	0.147763	0.600434	106.932	0		0.827625	0.0259141	0.454236	77.2063	0
13Jul2017 21:23:58'	0.8225	0.142965	0.600434	105.3	0		0.828375	0.0233601	0.454236	76.1292	0
13Jul2017 21:33:58'	0.822	0.140101	0.600434	104.484	0		0.828375	0.0216907	0.454236	75.6191	0.125
13Jul2017 21:43:58'	0.822	0.138486	0.600434	103.939	0		0.828625	0.020308	0.454236	75.1089	0.125
13Jul2017 21:53:57'	0.82175	0.103324	0.600434	103.395	0		0.828125	0.0146882	0.454236	74.7688	0.125
13Jul2017 22:03:57'	0.8225	0.0684056	0.600434	102.035	0.25		0.827625	0.00950082	0.454236	74.372	0.125
13Jul2017 22:13:57'	0.82275	0.0338414	0.600434	100.674	0.25		0.8265	0.00453013	0.454236	74.2019	0.125
13Jul2017 22:23:58'	0.8225	0	0.600434	98.7696	0.25		0.82575	0	0.454236	73.9752	0.125
13Jul2017 22:33:58'	0.823	0	0.600434	96.3208	0.25		0.82525	0	0.454236	73.6351	0.125
13Jul2017 22:43:58'	0.823	0	0.600434	93.5998	0		0.824625	0	0.454236	73.3516	0.125
13Jul2017 22:53:58'	0.82375	0	0.600434	89.7905	0		0.824125	0	0.454236	72.8981	0.125
13Jul2017 23:03:57'	0.82325	0	0.600434	88.158	0.25		0.823375	0	0.454236	72.6147	0.25
13Jul2017 23:13:57'	0.82325	0	0.600434	85.4371	0.5		0.822875	0	0.454236	72.2179	0.25
13Jul2017 23:23:57'	0.8225	0	0.600434	81.8999	0.5		0.822375	0	0.454236	71.7644	0.25
13Jul2017 23:33:58'	0.8235	0	0.600434	78.0906	0.75		0.822625	0	0.454236	71.0842	0.125
13Jul2017 23:43:58'	0.82375	0	0.600434	72.1045	0.75		0.8225	0	0.454236	69.8938	0.125
13Jul2017 23:53:58'	0.82325	0	0.600434	67.2069	0.5		0.8225	0	0.454236	68.8167	0.125
14Jul2017 00:03:58'	0.8235	0	0.600434	63.9418	0.5		0.822	0	0.454236	68.4199	0.125
14Jul2017 00:13:57'	0.8215	0	0.600434	62.8534	0.5		0.82125	0	0.454236	68.6467	0.125
14Jul2017 00:23:57'	0.8215	0	0.600434	62.8534	0.25		0.82075	0	0.454236	69.667	0
14Jul2017 00:33:57'	0.82125	0	0.600434	64.2138	0.5		0.819875	0	0.454236	71.0842	0
14Jul2017 00:43:57'	0.82175	0	0.600434	65.8464	0.5		0.8195	0	0.454236	72.2179	0
14Jul2017 00:53:58'	0.82325	0.0099409	0.547415	66.6535	0.25		0.819375	0.00321417	0.4341	73.2281	0.125
14Jul2017 01:03:58'	0.82325	0.0156096	0.494397	70.18	0.25		0.819375	0.00577679	0.413964	74.1814	0.25
14Jul2017 01:13:58'	0.82275	0.017027	0.441378	75.3377	0		0.8195	0.00816524	0.393828	74.9079	0.375
14Jul2017 01:23:58'	0.821	0.015297	0.38836	82.127	0		0.8195	0.0102329	0.373692	75.691	0.375
14Jul2017 01:33:57'	0.81925	0.00402783	0.38836	88.6537	0		0.819375	0.00883165	0.373692	76.2576	0.25
14Jul2017 01:43:57'	0.818	0.00329019	0.38836	93.0048	0.25		0.818875	0.00770016	0.373692	76.8241	0.125
14Jul2017 01:53:57'	0.81675	0.00577024	0.38836	94.9084	0.25		0.81875	0.00652936	0.373692	77.2774	0
14Jul2017 02:03:58'	0.8155	0.00439943	0.38836	94.9084	0.25		0.818625	0.00538904	0.373692	77.674	0
14Jul2017 02:13:58'	0.815	0.00401753	0.38836	94.9084	0.25		0.817875	0.00408781	0.373692	78.3538	0
14Jul2017 02:23:58'	0.815	0.00302069	0.38836	94.3645	0		0.817875	0.00300465	0.373692	78.7504	0
14Jul2017 02:33:58'	0.8155	0.00360737	0.38836	94.3645	0		0.817375	0.00139302	0.373692	79.4869	0
14Jul2017 02:43:57'	0.81625	0.00539593	0.38836	94.9084	0		0.816875	0.000214036	0.373692	80.2801	0
14Jul2017 02:53:57'	0.8155	0.00662067	0.38836	95.9962	0.25		0.816875	0.00156264	0.373692	80.79	0
14Jul2017 03:03:57'	0.815	0.00824005	0.38836	97.0839	0.25		0.816625	0.00320207	0.373692	81.5265	0.125
14Jul2017 03:13:58'	0.81475	0.00905083	0.38836	97.6278	0.5		0.816375	0.00423847	0.373692	82.0364	0.125
14Jul2017 03:23:58'	0.814	0.00878191	0.38836	97.8998	0.5		0.8165	0.00485838	0.373692	82.2064	0.125
14Jul2017 03:33:58'	0.814	0.00898345	0.38836	97.8998	0.5		0.816375	0.00568745	0.373692	82.6029	0.125
14Jul2017 03:43:58'	0.814	0.00777423	0.38836	97.3559	0.75		0.816125	0.00551079	0.373692	82.6029	0
14Jul2017 03:53:57'	0.814	0.00556925	0.38836	96.2681	0.75		0.816125	0.00467849	0.373692	82.3197	0
14Jul2017 04:03:57'	0.8145	0.00354462	0.38836	94.9084	0.75		0.81575	0.00356295	0.373692	82.0364	0.125
14Jul2017 04:13:57'	0.8145	0.0020984	0.38836	92.189	0.5		0.81525	0.00143806	0.373692	81.3565	0.125
14Jul2017 04:23:57'	0.81525	0.00350355	0.38836	91.1012	0.25		0.815	0.000110553	0.373692	80.9033	0.125
14Jul2017 04:33:58'	0.81575	0.0078686	0.38836	88.6537	0.25		0.814625	0.00208336	0.373692	80.2801	0.125
14Jul2017 04:43:58'	0.81625	0.0149062	0.38836	84.8465	0.5		0.814125	0.00451313	0.373692	79.5436	0.125
14Jul2017 04:53:58'	0.81625	0.0169215	0.38836	83.7587	0.5		0.814125	0.00569458	0.373692	79.2036	0.125
14Jul2017 05:03:58'	0.81625	0.0174173	0.38836	83.4868	0.5		0.81375	0.00713568	0.373692	78.8071	0.125
14Jul2017 05:13:57'	0.815	0.0121314	0.38836	86.7501	0.5		0.812875	0.00748077	0.373692	79.0337	0.25
14Jul2017 05:23:57'	0.81225	0.00247336	0.38836	93.0048	0.25		0.811625	0.00702997	0.373692	79.7702	0.125
14Jul2017 05:33:57'	0.8095	0.00564554	0.38836	98.4437	0		0.80875	0.0064259	0.373692	81.1866	0.125
14Jul2017 05:43:58'	0.805	0.00447414	0.38836	100.075	0.5		0.805125	0.00534317	0.373692	83.2261	0
14Jul2017 05:53:58'	0.79775	0.00545489	0.38836	98.7156	2		0.799375	0.00535582	0.373692	85.8323	1
14Jul2017 06:03:58'	0.79025	0.0249745	0.38836	92.7328	4.5		0.791375	0.00809401	0.373692	88.2684	2.25
14Jul2017 06:13:58'	0.77575	0.0531519	0.38836	85.9342	8.25		0.780875	0.0151466	0.373692	90.0247	4.625
14Jul2017 06:23:57'	0.75375	0.0876943	0.38836	79.6795	13.5		0.76775	0.0267908	0.373692	90.5913	7.75
14Jul2017 06:33:57'	0.7265	0.129533	0.38836	72.3371	20.25		0.757125	0.0449547	0.373692	87.192	12
14Jul2017 06:43:57'	0.69975	0.166009	0.38836	67.4421	28.25		0.7475	0.0627828	0.373692	83.5094	17
14Jul2017 06:53:58'	0.68175	0.192121	0.38836	63.3629	36.75		0.7395	0.0797519	0.373692	79.3736	31.625
14Jul2017 07:03:58'	0.67125	0.206399	0.38836	61.4593	52.5		0.73275	0.0887988	0.373692	78.5238	46.875
14Jul2017 07:13:58'	0.6715	0.196384	0.38836	66.3543	66.5		0.72525	0.0831233	0.373692	84.7558	58
14Jul2017 07:23:58'	0.67175	0.162968	0.38836	82.9429	83.5		0.71725	0.0701512	0.373692	94.1605	71.625
14Jul2017 07:33:57'	0.6695	0.12998	0.38836	100.619	94.5		0.709875	0.0543405	0.373692	104.585	70.5
14Jul2017 07:43:57'	0.67225	0.093098	0.38836	117.752	97.5		0.704375	0.0415867	0.373692	112.743	64.625
14Jul2017 07:53:57'	0.6675	0.0703106	0.38836	131.621	111		0.698125	0.0374162	0.373692	117.162	60.75
14Jul2017 08:03:57'	0.64775	0.0819926	0.38836	135.7	133		0.6935	0.0370466	0.373692	119.485	55.875
14Jul2017 08:13:58'	0.6295	0.0953115	0.38836	138.147	160.5		0.692	0.0347365	0.373692	121.128	53
14Jul2017 08:23:58'	0.5915	0.12623	0.38836	141.683	202		0.690875	0.0315369	0.373692	122.998	57.25
14Jul2017 08:33:58'	0.56925	0.14303	0.38836	144.402	224.75		0.691625	0.02709	0.373692	124.584	61.125
14Jul2017 08:43:58'	0.537	0.173168	0.38836	145.49	268.25		0.689125	0.0239705	0.373692	126.907	69
14Jul2017 08:53:57'	0.49225	0.194725	0.38836	157.184	334		0.611625	0.0910575	0.373692	129.57	158.25
14Jul2017 09:03:57'	0.46925	0.187886	0.38836	172.14	402		0.531	0.169596	0.373692	129.74	253.75
14Jul2017 09:13:57'	0.43225	0.194044	0.38836	187.641	479.25		0.452	0.238226	0.373692	132.969	349.75
14Jul2017 09:23:58'	0.4215	0.172238	0.38836	203.958	524.75		0.381	0.304497	0.373692	133.819	440.625
14Jul2017 09:33:58'	0.42525	0.15163	0.38836	212.388	542		0.38575	0.2954	0.373692	136.199	448.875
14Jul2017 09:43:58'	0.41475	0.163327	0.38836	211.844	561.75		0.3845	0.289501	0.373692	138.748	459.375
14Jul2017 09:53:58'	0.4005	0.181841	0.38836	209.669	587.25		0.3775	0.297375	0.373692	138.238	475.25
14Jul2017 10:03:57'	0.369	0.229611	0.38836	201.51	621		0.358375	0.320595	0.373692	136.199	497.25
14Jul2017 10:13:57'	0.323	0.289747	0.38836	194.44	671.5		0.333125	0.35428	0.373692	132.516	530.5
14Jul2017 10:23:57'	0.307	0.310606	0.38836	191.992	683.75		0.330375	0.35558	0.373692	133.196	539.25
14Jul2017 10:33:58'	0.28575	0.345921	0.38836	184.922	721.5		0.321	0.371368	0.373692	130.42	569.75
14Jul2017 10:43:58'	0.2755	0.361554	0.38836	182.202	774		0.307375	0.390907	0.373692	127.814	614.875
14Jul2017 10:53:58'	0.27175	0.382633	0.38836	173.5	831		0.28825	0.422492	0.373692	122.488	669.75
14Jul2017 11:03:58'	0.28625	0.367571	0.38836	173.772	778.75		0.298375	0.419445	0.373692	119.485	643.625
14Jul2017 11:13:57'	0.32925	0.316414	0.38836	177.851	662.75		0.341125	0.377107	0.373692	119.655	570
14Jul2017 11:23:57'	0.32475	0.324715	0.38836	175.948	703		0.336125	0.385829	0.373692	117.956	611.625
14Jul2017 11:33:57'	0.362	0.273357	0.38836	183.018	577.5		0.389125	0.321357	0.373692	122.941	524.75
14Jul2017 11:43:57'	0.31425	0.338974	0.38836	174.044	735		0.345125	0.379456	0.373692	116.483	643.875
14Jul2017 11:53:58'	0.245	0.429435	0.38836	163.438	936.25		0.26925	0.475296	0.373692	107.474	791
14Jul2017 12:03:58'	0.22625	0.453141	0.38836	160.991	964.75		0.25125	0.506383	0.373692	101.979	804.75
14Jul2017 12:13:58'	0.171	0.528387	0.38836	150.929	1129		0.186625	0.595421	0.373692	91.2711	914.25
14Jul2017 12:23:58'	0.158	0.547349	0.38836	147.937	1153.25		0.172875	0.614776	0.373692	88.7217	926
14Jul2017 12:33:57'	0.201	0.478311	0.38836	160.991	938.25		0.230625	0.54395	0.373692	94.5571	769
14Jul2017 12:43:57'	0.19075	0.490653	0.38836	159.903	955		0.227	0.546863	0.373692	94.6704	771
14Jul2017 12:53:57'	0.17525	0.506177	0.38836	159.903	1005.25		0.222625	0.550697	0.373692	94.7838	809.5
14Jul2017 13:03:58'	0.1665	0.518663	0.38836	157.999	1061.25		0.219	0.561628	0.373692	91.8377	846.875
14Jul2017 13:13:58'	0.0965	0.616319	0.38836	144.13	1362.5		0.145375	0.653341	0.373692	83.6794	1053.38
14Jul2017 13:23:58'	0.08975	0.625278	0.38836	143.042	1271.75		0.157375	0.638329	0.373692	84.6992	967.875
14Jul2017 13:33:58'	0.097	0.625595	0.38836	139.235	1321		0.1545	0.646506	0.373692	82.3197	974.375
14Jul2017 13:43:57'	0.08825	0.637108	0.38836	137.876	1374.25		0.15	0.653836	0.373692	80.9033	973.25
14Jul2017 13:53:57'	0.1225	0.599039	0.38836	139.779	1066.5		0.206375	0.587985	0.373692	84.6992	762.75
14Jul2017 14:03:57'	0.13275	0.588203	0.38836	140.051	1230.5		0.19325	0.607182	0.373692	82.7162	869.25
14Jul2017 14:13:58'	0.136	0.581712	0.38836	141.683	1157.5		0.20475	0.594029	0.373692	83.8493	837
14Jul2017 14:23:58'	0.15075	0.560454	0.38836	144.946	1042.25		0.226875	0.567248	0.373692	86.1722	799.625
14Jul2017 14:33:58'	0.1435	0.575288	0.38836	141.139	1271.25		0.194875	0.611213	0.373692	81.5265	970.25
14Jul2017 14:43:58'	0.14875	0.56625	0.38836	143.042	1128.75		0.21925	0.588292	0.373692	80.6767	919.25
14Jul2017 14:53:57'	0.1705	0.530381	0.38836	150.113	1010.25		0.2445	0.556981	0.373692	82.8862	859.25
14Jul2017 15:03:57'	0.266	0.407325	0.38836	163.982	759.5		0.321	0.470792	0.373692	87.8152	678.875
14Jul2017 15:13:57'	0.35875	0.281048	0.38836	180.843	518		0.402375	0.372357	0.373692	96.1435	502.25
14Jul2017 15:23:57'	0.41125	0.206371	0.38836	191.992	410		0.4435	0.31887	0.373692	102.092	425.125
14Jul2017 15:33:58'	0.5065	0.09772	0.38836	198.791	264.5		0.516875	0.23855	0.373692	106.341	309.5
14Jul2017 15:43:58'	0.54075	0.0736963	0.38836	193.624	263		0.544125	0.211079	0.373692	106.625	308.875
14Jul2017 15:53:58'	0.54425	0.0706584	0.38836	193.352	293.25		0.5435	0.206011	0.373692	109.231	339.75
14Jul2017 16:03:58'	0.58075	0.0374984	0.38836	191.72	220.25		0.568	0.184438	0.373692	108.154	268.875
14Jul2017 16:13:57'	0.596	0.0314606	0.38836	187.097	196.75		0.583875	0.170806	0.373692	107.304	229.375
14Jul2017 16:23:57'	0.6175	0.0251582	0.38836	179.483	163.75		0.60775	0.15224	0.373692	105.208	179.875
14Jul2017 16:33:57'	0.66925	0.00531777	0.38836	168.877	86.5		0.663125	0.110623	0.373692	99.5994	86.875
14Jul2017 16:43:58'	0.72875	0.0442399	0.38836	158.543	28.5		0.723875	0.0549361	0.373692	98.0131	28.75
14Jul2017 16:53:58'	0.75575	0.0533622	0.38836	149.569	11		0.75325	0.0330421	0.373692	94.8404	12
14Jul2017 17:03:58'	0.7625	0.0563285	0.38836	147.665	9		0.762625	0.0278298	0.373692	92.8575	9.75
14Jul2017 17:13:58'	0.76275	0.0469475	0.38836	142.771	8		0.76475	0.0316982	0.373692	89.7415	9.25
14Jul2017 17:23:57'	0.76725	0.0462499	0.38836	140.051	10.25		0.76625	0.0342596	0.373692	87.6452	12
14Jul2017 17:33:57'	0.764	0.041374	0.38836	139.235	12.25		0.762125	0.0398426	0.373692	86.8521	14.125
14Jul2017 17:43:57'	0.76275	0.0342822	0.38836	136.244	13.5		0.759375	0.0429819	0.373692	86.7954	15.25
14Jul2017 17:53:58'	0.76175	0.0263145	0.38836	132.709	14.75		0.757875	0.0456062	0.373692	86.3422	16.125
14Jul2017 18:03:58'	0.761	0.0162445	0.38836	128.086	13		0.759	0.044218	0.373692	86.6254	14.125
14Jul2017 18:13:58'	0.76275	0.00516662	0.38836	121.559	12.5		0.7625	0.0397195	0.373692	87.192	13.75
14Jul2017 18:23:58'	0.76225	0.00678709	0.38836	122.647	14.75		0.76175	0.0381378	0.373692	88.1551	16.5
14Jul2017 18:33:57'	0.75925	0.012386	0.38836	126.998	18.25		0.758125	0.0366153	0.373692	90.478	21.5
14Jul2017 18:43:57'	0.754	0.0190364	0.38836	132.981	26.25		0.7495	0.0387501	0.373692	93.3674	33
14Jul2017 18:53:57'	0.74675	0.0283991	0.38836	141.411	37.25		0.738375	0.0449898	0.373692	95.4636	51.375
14Jul2017 19:03:57'	0.73525	0.0243354	0.38836	145.218	54.25		0.72375	0.0554029	0.373692	97.2199	83.5
14Jul2017 19:13:58'	0.72725	0.0228479	0.38836	148.481	68.75		0.71275	0.0631077	0.373692	98.6363	106.25
14Jul2017 19:23:58'	0.71675	0.022629	0.38836	153.648	83.5		0.6995	0.0741321	0.373692	99.4295	127.875
14Jul2017 19:33:58'	0.7135	0.0275401	0.38836	157.727	90		0.69625	0.0741203	0.373692	100.902	135.625
14Jul2017 19:43:58'	0.71675	0.0347824	0.38836	159.631	83		0.7005	0.0687691	0.373692	101.469	118.625
14Jul2017 19:53:57'	0.723	0.0388908	0.38836	158.543	72		0.70875	0.0618599	0.373692	100.789	100.5
14Jul2017 20:03:57'	0.73825	0.047664	0.38836	155.28	52.5		0.7285	0.0483418	0.373692	97.9564	72.375
14Jul2017 20:13:57'	0.7505	0.0535743	0.38836	152.017	34.5		0.74375	0.0406079	0.373692	94.3872	46.25
14Jul2017 20:23:58'	0.76725	0.0614859	0.38836	147.665	19.25		0.763875	0.0288844	0.373692	90.478	25.75
14Jul2017 20:33:58'	0.7845	0.071544	0.38836	144.13	9.25		0.783	0.0196896	0.373692	85.8889	13.125
14Jul2017 20:43:58'	0.7965	0.0752485	0.38836	140.051	3.5		0.7975	0.0155864	0.373692	80.9599	5.25
14Jul2017 20:53:58'	0.80725	0.0728607	0.38836	133.524	0.5		0.8085	0.0172077	0.373692	75.0678	1.375
14Jul2017 21:03:57'	0.813	0.0667482	0.38836	127.542	0		0.81475	0.0230907	0.373692	69.3457	0.375
14Jul2017 21:13:57'	0.8135	0.0576058	0.38836	122.647	0.25		0.8165	0.0307952	0.373692	64.8133	0.125
14Jul2017 21:23:57'	0.81625	0.0498115	0.38836	117.208	0.5		0.817875	0.0360278	0.373692	61.6973	0.25
14Jul2017 21:33:58'	0.816	0.045703	0.38836	115.304	0.5		0.819	0.038369	0.373692	59.941	0.375
14Jul2017 21:43:58'	0.81625	0.0417657	0.38836	113.129	0.75		0.819375	0.0402924	0.373692	58.6945	0.375
14Jul2017 21:53:58'	0.8165	0.0294519	0.38836	110.681	0.75		0.82	0.0307395	0.373692	57.8447	0.375
14Jul2017 22:03:58'	0.81475	0.0192983	0.38836	110.137	0.5		0.82025	0.0206283	0.373692	57.3915	0.375
14Jul2017 22:13:57'	0.81425	0.00907609	0.38836	108.234	0.5		0.820875	0.0106229	0.373692	56.8249	0.375
14Jul2017 22:23:57'	0.813	0	0.38836	107.418	0.25		0.82125	0	0.373692	56.7683	0.5
14Jul2017 22:33:57'	0.8145	0	0.38836	105.514	0.25		0.8215	0	0.373692	56.7683	0.375
14Jul2017 22:43:57'	0.8145	0	0.38836	104.426	0.25		0.821875	0	0.373692	56.7683	0.375
14Jul2017 22:53:58'	0.81475	0	0.38836	103.611	0		0.82125	0	0.373692	57.2782	0.375
14Jul2017 23:03:58'	0.8155	0	0.38836	102.523	0.25		0.820375	0	0.373692	57.7881	0.25
14Jul2017 23:13:58'	0.8145	0	0.38836	102.523	0.5		0.820125	0	0.373692	58.1846	0.25
14Jul2017 23:23:58'	0.81375	0	0.38836	102.251	0.75		0.819375	0	0.373692	58.6945	0.25
14Jul2017 23:33:57'	0.81325	0	0.38836	101.435	0.75		0.819	0	0.373692	58.8645	0.25
14Jul2017 23:43:57'	0.81325	0	0.38836	100.075	0.5		0.82	0	0.373692	58.5246	0.25
14Jul2017 23:53:57'	0.81275	0	0.38836	98.9876	0.5		0.81975	0	0.373692	58.5812	0.25
15Jul2017 00:03:58'	0.814	0	0.38836	97.0839	0.5		0.819375	0	0.373692	58.7512	0.25
15Jul2017 00:13:58'	0.81425	0	0.38836	95.9962	0.75		0.81975	0	0.373692	58.6945	0.25
15Jul2017 00:23:58'	0.81375	0	0.38836	95.4523	1		0.818625	0	0.373692	59.2044	0.375
15Jul2017 00:33:58'	0.814	0	0.38836	94.3645	0.75		0.818125	0	0.373692	59.5444	0.375
15Jul2017 00:43:57'	0.81375	0	0.38836	93.8206	0.5		0.81825	0	0.373692	59.7143	0.375
15Jul2017 00:53:57'	0.81325	0.00342291	0.399807	93.5359	0.25		0.817625	0.000545341	0.406057	60.2159	0.375
15Jul2017 01:03:57'	0.81275	0.00642132	0.411254	93.2512	0.25		0.8175	0.00116611	0.438421	60.4909	0.375
15Jul2017 01:13:58'	0.812	0.00929376	0.422702	93.2385	0.5		0.81675	0.001301	0.470786	60.9923	0.5
15Jul2017 01:23:58'	0.812	0.0122604	0.434149	92.954	0.75		0.816	0.00113066	0.50315	61.5503	0.5
15Jul2017 01:33:58'	0.8125	0.0115705	0.434149	92.4104	0.75		0.814875	0.000388657	0.50315	62.1732	0.5
15Jul2017 01:43:58'	0.81225	0.0114751	0.434149	92.4104	0.5		0.8145	0.000489179	0.50315	62.6262	0.375
15Jul2017 01:53:57'	0.81175	0.0109493	0.434149	92.4104	0.25		0.81425	0.00103231	0.50315	62.9093	0.375
15Jul2017 02:03:57'	0.81075	0.0106772	0.434149	92.6822	0		0.814375	0.00126035	0.50315	62.9659	0.375
15Jul2017 02:13:57'	0.81075	0.0105683	0.434149	92.6822	0		0.8145	0.00131146	0.50315	62.9659	0.25
15Jul2017 02:23:57'	0.81175	0.00974473	0.434149	91.8668	0.25		0.814875	0.00107633	0.50315	62.7394	0.375
15Jul2017 02:33:58'	0.81275	0.00904179	0.434149	91.0514	0.25		0.815	0.00061675	0.50315	62.5129	0.375
15Jul2017 02:43:58'	0.8135	0.00855909	0.434149	90.5078	0.5		0.8145	0.000340095	0.50315	62.5695	0.375
15Jul2017 02:53:58'	0.81375	0.00724494	0.434149	89.6924	0.75		0.814375	0.000112489	0.50315	62.4563	0.375
15Jul2017 03:03:58'	0.8135	0.00638006	0.434149	89.4206	0.75		0.814	0.000341422	0.50315	62.5129	0.25
15Jul2017 03:13:57'	0.81275	0.00563181	0.434149	89.4206	1		0.813875	0.000652483	0.50315	62.4563	0.25
15Jul2017 03:23:57'	0.8135	0.00397147	0.434149	88.3335	1		0.814125	0.00101551	0.50315	62.2298	0.25
15Jul2017 03:33:57'	0.813	0.00321907	0.434149	88.3335	1		0.814875	0.00104223	0.50315	61.9467	0.375
15Jul2017 03:43:58'	0.81275	0.00245491	0.434149	88.0617	0.75		0.814125	0.000866057	0.50315	62.2298	0.5
15Jul2017 03:53:58'	0.8135	0.00189608	0.434149	87.5181	0.5		0.813875	0.000170995	0.50315	62.5695	0.5
15Jul2017 04:03:58'	0.813	0.0013545	0.434149	87.5181	0.25		0.813625	0.000338991	0.50315	62.8526	0.5
15Jul2017 04:13:58'	0.8125	0.000475032	0.434149	87.2463	0.25		0.812625	0.000825433	0.50315	63.4189	0.5
15Jul2017 04:23:57'	0.813	0.000183294	0.434149	86.7027	0.25		0.8125	0.00108663	0.50315	63.5888	0.5
15Jul2017 04:33:57'	0.81325	0.00116014	0.434149	86.1591	0.25		0.81275	0.000674733	0.50315	63.4189	0.5
15Jul2017 04:43:57'	0.81375	0.00224361	0.434149	85.3437	0.5		0.81225	4.69602e-05	0.50315	63.3623	0.5
15Jul2017 04:53:58'	0.8145	0.00267419	0.434149	84.8001	0.25		0.812625	0.000304806	0.50315	63.1358	0.5
15Jul2017 05:03:58'	0.81575	0.00330457	0.434149	83.9847	0.25		0.8125	0.000283718	0.50315	63.1924	0.375
15Jul2017 05:13:58'	0.81425	0.00366088	0.434149	84.5283	0.5		0.810875	9.69363e-05	0.50315	63.8153	0.375
15Jul2017 05:23:58'	0.813	0.00268851	0.434149	85.6155	0.25		0.808875	0.00141974	0.50315	64.9477	0.25
15Jul2017 05:33:57'	0.811	0.000460126	0.434149	88.0617	0		0.80475	0.00405677	0.50315	67.2693	0
15Jul2017 05:43:57'	0.80475	0.00191259	0.434149	91.595	0.75		0.798625	0.00510166	0.50315	69.7042	1
15Jul2017 05:53:57'	0.79725	0.000979557	0.434149	94.5847	3.5		0.79	0.00304032	0.50315	71.9691	4.125
15Jul2017 06:03:57'	0.78	0.00861249	0.434149	98.1181	8.75		0.77675	0.00418416	0.50315	74.0076	10.625
15Jul2017 06:13:58'	0.75875	0.0245546	0.434149	100.564	16		0.756	0.0167748	0.50315	76.7255	20.375
15Jul2017 06:23:58'	0.7405	0.0410021	0.434149	101.38	25.25		0.734875	0.0338878	0.50315	78.0845	32
15Jul2017 06:33:58'	0.72625	0.0535468	0.434149	102.195	35.25		0.72025	0.045338	0.50315	79.1604	45.125
15Jul2017 06:43:58'	0.71575	0.0598779	0.434149	104.098	48.25		0.706875	0.0542921	0.50315	80.6892	62.875
15Jul2017 06:53:57'	0.70475	0.0678778	0.434149	105.457	71.75		0.696625	0.0644145	0.50315	80.7458	97.25
15Jul2017 07:03:57'	0.689	0.0730553	0.434149	110.349	92.5		0.6835	0.0707488	0.50315	83.0674	125.125
15Jul2017 07:13:57'	0.671	0.0786487	0.434149	116.057	117.75		0.665	0.0790949	0.50315	86.5215	156.875
15Jul2017 07:23:58'	0.66275	0.0712127	0.434149	123.395	129.25		0.65875	0.0749689	0.50315	90.1454	167
15Jul2017 07:33:58'	0.656	0.0551821	0.434149	133.995	132.5		0.65725	0.0656234	0.50315	93.9392	160.875
15Jul2017 07:43:58'	0.6535	0.0366261	0.434149	143.78	137.5		0.6605	0.0541629	0.50315	96.8837	158.75
15Jul2017 07:53:58'	0.63975	0.0300556	0.434149	153.293	167.25		0.653625	0.0494381	0.50315	101.017	176.125
15Jul2017 08:03:57'	0.63	0.0216659	0.434149	161.718	180		0.6465	0.0488064	0.50315	103.735	185.75
15Jul2017 08:13:57'	0.61025	0.0261767	0.434149	168.785	210.75		0.6425	0.0458727	0.50315	106.17	202.875
15Jul2017 08:23:57'	0.59475	0.0234574	0.434149	177.21	229.75		0.6355	0.0452654	0.50315	108.775	217.5
15Jul2017 08:33:58'	0.5735	0.0288726	0.434149	184.549	251.25		0.639875	0.0369491	0.50315	110.134	231.75
15Jul2017 08:43:58'	0.52425	0.0680315	0.434149	189.169	336		0.63175	0.0374474	0.50315	112.795	281.5
15Jul2017 08:53:58'	0.47975	0.103117	0.434149	193.518	400.5		0.619875	0.0402975	0.50315	115.966	316.25
15Jul2017 09:03:58'	0.43175	0.154806	0.434149	191.887	457.25		0.612625	0.0446924	0.50315	116.985	345.875
15Jul2017 09:13:57'	0.4205	0.161242	0.434149	194.062	455.25		0.60975	0.0482722	0.50315	116.702	331.625
15Jul2017 09:23:57'	0.45025	0.132689	0.434149	193.518	390.5		0.613875	0.0492242	0.50315	114.833	298.25
15Jul2017 09:33:57'	0.49075	0.102148	0.434149	188.898	322.25		0.617125	0.0527077	0.50315	112.399	269.25
15Jul2017 09:43:57'	0.54975	0.0517864	0.434149	184.821	247.5		0.629	0.0559715	0.50315	107.019	226.25
15Jul2017 09:53:58'	0.57275	0.0347156	0.434149	182.103	226.25		0.62525	0.0722499	0.50315	102.546	226.25
15Jul2017 10:03:58'	0.5845	0.0236531	0.434149	181.831	220.25		0.623875	0.0859305	0.50315	98.186	222.5
15Jul2017 10:13:58'	0.52525	0.0729484	0.434149	186.452	331.75		0.57725	0.130566	0.50315	98.4125	297.75
15Jul2017 10:23:58'	0.471	0.126166	0.434149	186.995	420.5		0.518	0.179606	0.50315	101.697	384.875
15Jul2017 10:33:57'	0.386	0.226976	0.434149	179.657	584.5		0.4455	0.253205	0.50315	101.357	502.625
15Jul2017 10:43:57'	0.3505	0.258859	0.434149	181.287	634.75		0.41025	0.279083	0.50315	104.585	546.625
15Jul2017 10:53:57'	0.41275	0.208918	0.434149	175.58	514.75		0.45225	0.247189	0.50315	101.527	468
15Jul2017 11:03:58'	0.39475	0.195894	0.434149	189.985	533.5		0.46725	0.201992	0.50315	112.172	457
15Jul2017 11:13:58'	0.40275	0.187918	0.434149	189.985	571.75		0.437	0.255484	0.460756	97.9595	367.25
15Jul2017 11:23:58'	0.34	0.265931	0.434149	182.918	749.25		0.376	0.319227	0.460756	97.0535	454.5
15Jul2017 11:33:58'	0.261	0.350218	0.434149	180.472	963		0.30525	0.384333	0.460756	98.8655	575
15Jul2017 11:43:57'	0.22	0.413982	0.434149	169.872	1078.5		0.2775	0.425614	0.460756	94.5621	633
15Jul2017 11:53:57'	0.26275	0.355976	0.434149	176.939	920		0.333	0.365922	0.460756	95.9211	565.75
15Jul2017 12:03:57'	0.2825	0.324505	0.434149	182.375	830		0.3635	0.328054	0.460756	98.2993	540
15Jul2017 12:13:58'	0.3035	0.288957	0.434149	189.169	747.75		0.3765	0.306591	0.460756	101.017	500.75
15Jul2017 12:23:58'	0.39175	0.204278	0.434149	187.539	561.5		0.4325	0.258323	0.460756	98.5258	410
15Jul2017 12:33:58'	0.41075	0.181216	0.434149	189.441	540.5		0.44375	0.249176	0.460756	97.8463	396
15Jul2017 12:43:58'	0.475	0.114632	0.434149	190.528	429.25		0.49675	0.203638	0.460756	95.4681	329.25
15Jul2017 12:53:57'	0.495	0.0834553	0.434149	195.693	383.25		0.51375	0.185531	0.460756	95.8078	310.75
15Jul2017 13:03:57'	0.439	0.126476	0.434149	201.672	502.5		0.4785	0.208051	0.460756	99.8848	382.25
15Jul2017 13:13:57'	0.45025	0.123342	0.434149	197.867	487		0.487	0.20133	0.460756	99.3185	369.25
15Jul2017 13:23:57'	0.4145	0.15028	0.434149	201.944	564.25		0.45325	0.226172	0.460756	102.15	404.5
15Jul2017 13:33:58'	0.3835	0.194737	0.434149	195.693	695.5		0.423	0.257169	0.460756	101.923	455.25
15Jul2017 13:43:58'	0.37775	0.208174	0.434149	192.159	809.25		0.4055	0.279967	0.460756	100.224	491.25
15Jul2017 13:53:58'	0.309	0.276332	0.434149	192.431	1086.75		0.3465	0.330774	0.460756	102.829	608.75
15Jul2017 14:03:58'	0.30375	0.285723	0.434149	190.528	1150.25		0.334	0.342533	0.460756	103.056	633.5
15Jul2017 14:13:57'	0.32075	0.263425	0.434149	192.975	1094		0.35325	0.323545	0.460756	102.942	606.5
15Jul2017 14:23:57'	0.31675	0.266856	0.434149	193.246	1075.25		0.3605	0.322415	0.460756	101.017	603.5
15Jul2017 14:33:57'	0.31875	0.267204	0.434149	192.159	1013.5		0.3685	0.324685	0.460756	97.733	601.5
15Jul2017 14:43:58'	0.313	0.287561	0.434149	185.364	1032.75		0.36625	0.336522	0.460756	94.6753	627
15Jul2017 14:53:58'	0.3055	0.309719	0.434149	178.569	1070.25		0.35325	0.358104	0.460756	91.9574	656.5
15Jul2017 15:03:58'	0.326	0.286257	0.434149	179.928	1011.25		0.3625	0.342472	0.460756	93.9959	640.75
15Jul2017 15:13:58'	0.34825	0.264595	0.434149	179.657	986.5		0.37475	0.32637	0.460756	95.2416	632.25
15Jul2017 15:23:57'	0.34825	0.26118	0.434149	181.287	987		0.3825	0.326485	0.460756	92.7501	616.75
15Jul2017 15:33:57'	0.38125	0.215966	0.434149	186.995	903.5		0.41275	0.293386	0.460756	93.6561	568.25
15Jul2017 15:43:57'	0.402	0.196422	0.434149	186.452	884.5		0.432	0.276619	0.460756	92.8634	548.75
15Jul2017 15:53:58'	0.44725	0.145995	0.434149	188.898	737		0.46875	0.242664	0.460756	91.9574	459.5
15Jul2017 16:03:58'	0.50925	0.088614	0.434149	186.723	538		0.51725	0.191683	0.460756	92.7501	358.25
15Jul2017 16:13:58'	0.52075	0.0776311	0.434149	186.452	575.25		0.518	0.19344	0.460756	91.9574	366.25
15Jul2017 16:23:58'	0.55475	0.0512627	0.434149	182.918	535.25		0.53175	0.184246	0.460756	90.4852	325.5
15Jul2017 16:33:57'	0.565	0.0427736	0.434149	182.103	583.5		0.5385	0.178576	0.460756	90.1454	324.5
15Jul2017 16:43:57'	0.56025	0.0399389	0.434149	185.636	697.75		0.53175	0.18391	0.460756	90.5984	374
15Jul2017 16:53:57'	0.5815	0.0262848	0.434149	182.103	631		0.5605	0.16113	0.460756	88.6732	331.5
15Jul2017 17:03:57'	0.594	0.0136196	0.434149	182.103	584.25		0.58075	0.143781	0.460756	87.7672	312
15Jul2017 17:13:58'	0.6045	0.00351901	0.434149	181.831	531		0.59925	0.130698	0.460756	86.0685	300.25
15Jul2017 17:23:58'	0.613	0.00384668	0.434149	181.287	483.5		0.6145	0.117493	0.460756	85.389	276.25
15Jul2017 17:33:58'	0.6295	0.0174269	0.434149	179.928	374.5		0.632	0.102952	0.460756	84.483	228
15Jul2017 17:43:58'	0.63925	0.0194516	0.434149	176.395	325		0.6445	0.096401	0.460756	82.5578	201
15Jul2017 17:53:57'	0.6515	0.0227447	0.434149	172.318	274.75		0.653	0.0906439	0.460756	81.6518	180.75
15Jul2017 18:03:57'	0.6665	0.0295521	0.434149	168.513	215.75		0.665	0.0832513	0.460756	80.1796	156.75
15Jul2017 18:13:57'	0.6705	0.0307225	0.434149	167.154	230.25		0.67325	0.0777996	0.460756	79.2736	164
15Jul2017 18:23:58'	0.67625	0.0347754	0.434149	166.339	181.5		0.6775	0.0736581	0.460756	79.2736	152.25
15Jul2017 18:33:58'	0.68025	0.0365173	0.434149	165.252	158.5		0.683	0.0692003	0.460756	78.9339	140.5
15Jul2017 18:43:58'	0.68825	0.0379808	0.434149	162.262	146		0.68775	0.0658268	0.460756	78.4809	128.5
15Jul2017 18:53:58'	0.7005	0.0412002	0.434149	158.185	119		0.6945	0.0616394	0.460756	77.6881	119.75
15Jul2017 19:03:57'	0.71275	0.046499	0.434149	154.923	109		0.7045	0.054469	0.460756	76.7822	116
15Jul2017 19:13:57'	0.72275	0.0495561	0.434149	151.662	83.5		0.71025	0.0505252	0.460756	76.2159	107.25
15Jul2017 19:23:57'	0.7305	0.052842	0.434149	149.487	54.75		0.71925	0.0451789	0.460756	75.0834	95.75
15Jul2017 19:33:58'	0.7365	0.0583197	0.434149	149.216	47.5		0.72375	0.0426753	0.460756	74.4039	83.5
15Jul2017 19:43:58'	0.7425	0.0606233	0.434149	147.585	40		0.7295	0.0407165	0.460756	73.1582	70
15Jul2017 19:53:58'	0.7505	0.0637277	0.434149	145.41	32.5		0.737	0.0381807	0.460756	71.5727	56
15Jul2017 20:03:58'	0.7595	0.066265	0.434149	142.421	24.75		0.74425	0.0365164	0.460756	69.7608	41.5
15Jul2017 20:13:57'	0.76875	0.0673745	0.434149	138.616	17.5		0.756	0.0323279	0.460756	67.3826	28
15Jul2017 20:23:57'	0.78275	0.0742646	0.434149	135.354	11		0.77275	0.0223818	0.460756	65.2309	16.75
15Jul2017 20:33:57'	0.7975	0.0831065	0.434149	132.636	6		0.7905	0.0109686	0.460756	63.1924	8.75
15Jul2017 20:43:57'	0.81075	0.090306	0.434149	129.918	2.5		0.807	0.000560432	0.460756	61.2672	3.5
15Jul2017 20:53:58'	0.82175	0.094171	0.434149	126.657	0.75		0.819	0.00675149	0.460756	59.795	0.75
15Jul2017 21:03:58'	0.82675	0.0910264	0.434149	122.851	0.25		0.8245	0.00696051	0.460756	58.0962	0.5
15Jul2017 21:13:58'	0.82825	0.08386	0.434149	118.775	0.75		0.8265	0.004699	0.460756	56.7373	1
15Jul2017 21:23:58'	0.8285	0.0758647	0.434149	114.969	0.75		0.8275	0.00276522	0.460756	55.8313	1
15Jul2017 21:33:57'	0.82875	0.0675227	0.434149	110.892	0.75		0.8285	0.0012797	0.460756	55.0385	1
15Jul2017 21:43:57'	0.8285	0.0579657	0.434149	106.544	0.5		0.82975	0.000607258	0.460756	54.4723	1
15Jul2017 21:53:57'	0.82925	0.0398316	0.434149	100.564	0.5		0.831	0.000134792	0.460756	53.9061	1
15Jul2017 22:03:58'	0.8305	0.0238073	0.434149	93.4976	0.5		0.8315	9.17787e-05	0.460756	53.5663	1
15Jul2017 22:13:58'	0.83075	0.00967866	0.434149	88.0617	0.75		0.83175	0.000135729	0.460756	53.3398	1
15Jul2017 22:23:58'	0.8325	0	0.434149	82.8975	1		0.831	0	0.460756	53.4531	1
15Jul2017 22:33:58'	0.833	0	0.434149	78.8206	1		0.83025	0	0.460756	53.4531	1
15Jul2017 22:43:57'	0.8335	0	0.434149	75.2873	1		0.8295	0	0.460756	53.4531	1
15Jul2017 22:53:57'	0.83375	0	0.434149	70.6668	1		0.82925	0	0.460756	53.2266	1
15Jul2017 23:03:57'	0.83275	0	0.434149	67.677	1		0.82875	0	0.460756	53.1133	1
15Jul2017 23:13:58'	0.83225	0	0.434149	64.9591	1		0.82825	0	0.460756	53.0001	1
15Jul2017 23:23:58'	0.8325	0	0.434149	62.7847	1		0.828	0	0.460756	52.7736	1
15Jul2017 23:33:58'	0.835	0	0.434149	60.3385	1		0.82775	0	0.460756	52.7736	1
15Jul2017 23:43:58'	0.83575	0	0.434149	57.8924	1		0.828	0	0.460756	52.4338	1
15Jul2017 23:53:57'	0.836	0	0.434149	56.5334	1		0.82775	0	0.460756	52.5471	1
16Jul2017 00:03:57'	0.8365	0	0.434149	55.4462	1		0.8275	0	0.460756	52.6603	1
16Jul2017 00:13:57'	0.83575	0	0.434149	54.9026	1		0.82675	0	0.460756	52.6603	1
16Jul2017 00:23:57'	0.837	0	0.434149	54.0873	1		0.82625	0	0.460756	52.5471	1
16Jul2017 00:33:58'	0.83775	0	0.434149	53.0001	1		0.82575	0	0.460756	52.3206	1
16Jul2017 00:43:58'	0.83875	0	0.434149	51.6411	1		0.8255	0	0.460756	52.2073	1
16Jul2017 00:53:58'	0.83825	0.00141252	0.475057	51.3622	1		0.82525	0.00294428	0.477746	52.087	1
16Jul2017 01:03:58'	0.83575	0.00288534	0.515966	51.8983	1		0.82475	0.00583379	0.494737	52.1931	1
16Jul2017 01:13:57'	0.8345	0.00475861	0.556874	52.1629	1		0.82375	0.00746202	0.511728	52.0728	1
16Jul2017 01:23:57'	0.8345	0.00559879	0.597783	52.6995	1		0.8235	0.00985043	0.528719	51.8393	1
16Jul2017 01:33:57'	0.8345	0.00654456	0.597783	52.4278	1		0.82325	0.00714695	0.528719	51.1602	1
16Jul2017 01:43:58'	0.8365	0.00714709	0.597783	51.6129	1		0.82275	0.00479056	0.528719	50.7074	1
16Jul2017 01:53:58'	0.837	0.00671218	0.597783	51.6129	1		0.82325	0.00484436	0.528719	50.5942	1
16Jul2017 02:03:58'	0.83625	0.0083198	0.597783	51.3412	1		0.82275	0.00306149	0.528719	50.2547	1
16Jul2017 02:13:58'	0.835	0.0069994	0.597783	52.1562	1		0.822	0.00444894	0.528719	50.8206	1
16Jul2017 02:23:57'	0.8345	0.00580145	0.597783	52.6995	1		0.82175	0.00503439	0.528719	51.047	1
16Jul2017 02:33:57'	0.83525	0.00510006	0.597783	52.6995	1		0.82075	0.00477792	0.528719	51.2733	1
16Jul2017 02:43:57'	0.8345	0.0041999	0.597783	53.2428	1		0.82	0.00493536	0.528719	51.4997	1
16Jul2017 02:53:58'	0.83475	0.00391694	0.597783	53.2428	1		0.8195	0.00495356	0.528719	51.6129	1
16Jul2017 03:03:58'	0.8355	0.00403445	0.597783	52.9711	1		0.819	0.00452433	0.528719	51.6129	1
16Jul2017 03:13:58'	0.83475	0.00391035	0.597783	53.2428	1		0.81825	0.00379955	0.528719	51.6129	1
16Jul2017 03:23:58'	0.83325	0.00214627	0.597783	54.3294	1		0.818	0.00380376	0.528719	51.7261	1
16Jul2017 03:33:57'	0.833	0.00173307	0.597783	54.601	1		0.8185	0.00123732	0.528719	50.9338	1
16Jul2017 03:43:57'	0.8325	0.000529359	0.597783	55.1443	1		0.81875	0.00072101	0.528719	50.7074	1
16Jul2017 03:53:57'	0.83275	0.000705138	0.597783	55.416	1		0.8195	0.00115131	0.528719	50.5942	1
16Jul2017 04:03:57'	0.83325	0.000564185	0.597783	55.1443	1		0.819	0.000785535	0.528719	50.5942	1
16Jul2017 04:13:58'	0.834	0.00152756	0.597783	55.1443	1		0.81775	0.00173277	0.528719	51.1602	1
16Jul2017 04:23:58'	0.83325	0.00166896	0.597783	55.416	1		0.817	0.00128905	0.528719	51.2733	1
16Jul2017 04:33:58'	0.834	0.00138916	0.597783	55.1443	1		0.81625	3.54977e-05	0.528719	51.1602	1
16Jul2017 04:43:58'	0.83275	0.000963826	0.597783	55.416	1		0.81625	0.000862594	0.528719	50.9338	1
16Jul2017 04:53:57'	0.83325	0.000415893	0.597783	55.1443	1		0.81575	0.00184581	0.528719	50.8206	1
16Jul2017 05:03:57'	0.83325	0.00027831	0.597783	55.1443	1		0.815	0.00260679	0.528719	50.8206	1
16Jul2017 05:13:57'	0.82925	0.000278011	0.597783	56.2309	1		0.81375	0.00368636	0.528719	50.8206	1
16Jul2017 05:23:58'	0.82725	0.000153161	0.597783	57.0458	1		0.81125	0.00379226	0.528719	51.4997	1
16Jul2017 05:33:58'	0.82375	0.00177254	0.597783	58.6757	0.75		0.8065	0.00163859	0.528719	53.4239	0.75
16Jul2017 05:43:58'	0.818	0.00352367	0.597783	61.1205	0		0.8005	0.000746709	0.528719	55.348	0.25
16Jul2017 05:53:58'	0.8115	0.00450584	0.597783	63.5654	1.75		0.78975	0.00224693	0.528719	57.9513	2.5
16Jul2017 06:03:57'	0.80425	0.000539694	0.597783	64.6519	4.75		0.77475	0.0110083	0.528719	59.6491	6.5
16Jul2017 06:13:57'	0.7935	0.00870102	0.597783	65.1952	8.75		0.7615	0.0267545	0.528719	58.97	12.25
16Jul2017 06:23:57'	0.7825	0.0198131	0.597783	65.1952	13.5		0.745	0.0488017	0.528719	57.3854	21.25
16Jul2017 06:33:58'	0.7705	0.0352658	0.597783	64.1086	18.5		0.72825	0.0769458	0.528719	54.2162	43.25
16Jul2017 06:43:58'	0.75975	0.0468998	0.597783	63.837	23.75		0.71375	0.102815	0.528719	51.047	55.5
16Jul2017 06:53:58'	0.74925	0.055701	0.597783	64.3803	37.75		0.703	0.124094	0.528719	48.1041	64.75
16Jul2017 07:03:58'	0.74125	0.0611158	0.597783	65.1952	49.5		0.69525	0.140447	0.528719	45.7272	73
16Jul2017 07:13:57'	0.7375	0.0606617	0.597783	66.5535	65.75		0.68975	0.15042	0.528719	44.4822	73.75
16Jul2017 07:23:57'	0.7365	0.0558256	0.597783	68.455	81		0.65225	0.188405	0.528719	44.369	91.75
16Jul2017 07:33:57'	0.73525	0.0479671	0.597783	71.4431	85.75		0.60725	0.227634	0.528719	45.9536	118.25
16Jul2017 07:43:57'	0.73375	0.036419	0.597783	75.7895	89.75		0.574	0.2531	0.528719	48.1041	131.75
16Jul2017 07:53:58'	0.734	0.0132694	0.597783	83.3956	86		0.501	0.306937	0.528719	53.4239	155
16Jul2017 08:03:58'	0.73325	0.0247335	0.597783	96.163	81.25		0.5315	0.261326	0.528719	57.6118	153.25
16Jul2017 08:13:58'	0.73475	0.0741369	0.597783	111.918	76.5		0.48825	0.282203	0.528719	63.837	174
16Jul2017 08:23:58'	0.73925	0.122466	0.597783	126.316	74		0.44	0.293028	0.528719	74.2501	212.75
16Jul2017 08:33:57'	0.74325	0.16122	0.597783	137.725	75		0.43725	0.263254	0.528719	83.305	241.5
16Jul2017 08:43:57'	0.74325	0.179213	0.597783	143.701	77.75		0.3645	0.305106	0.528719	91.9072	292
16Jul2017 08:53:57'	0.74475	0.184814	0.597783	145.059	82.25		0.36325	0.2852	0.528719	97.7929	315
16Jul2017 09:03:58'	0.74225	0.186381	0.597783	146.418	87.75		0.3555	0.288055	0.528719	99.1511	336.5
16Jul2017 09:13:58'	0.73725	0.187947	0.597783	148.591	93.5		0.3415	0.307707	0.528719	97.5665	354.5
16Jul2017 09:23:58'	0.7335	0.190788	0.597783	150.764	103.5		0.3275	0.319739	0.528719	98.1324	369.75
16Jul2017 09:33:58'	0.72775	0.193128	0.597783	153.48	148		0.31925	0.330865	0.528719	97.3401	364.75
16Jul2017 09:43:57'	0.722	0.194138	0.597783	155.654	221		0.309	0.343977	0.528719	96.5478	340
16Jul2017 09:53:57'	0.7185	0.190812	0.597783	155.654	320.5		0.30425	0.346339	0.528719	97.2269	289.25
16Jul2017 10:03:57'	0.71475	0.188899	0.597783	156.197	439.5		0.32925	0.33591	0.528719	93.1522	231
16Jul2017 10:13:58'	0.71025	0.186179	0.597783	156.74	543.75		0.3255	0.349014	0.528719	90.5489	197
16Jul2017 10:23:58'	0.70725	0.183008	0.597783	156.74	634.5		0.3845	0.302214	0.528719	87.1534	168.5
16Jul2017 10:33:58'	0.70125	0.179238	0.597783	157.555	709		0.45125	0.252153	0.528719	82.5127	158
16Jul2017 10:43:58'	0.6965	0.174376	0.597783	157.555	767.25		0.3815	0.310586	0.528719	85.6819	181.75
16Jul2017 10:53:57'	0.69225	0.167703	0.597783	156.74	814.25		0.45575	0.239286	0.528719	84.8896	229.5
16Jul2017 11:03:57'	0.6875	0.16452	0.597783	157.284	854.25		0.46575	0.225587	0.528719	85.9083	232.25
16Jul2017 11:13:57'	0.686	0.163781	0.597783	157.555	892.5		0.47625	0.209316	0.528719	87.4929	267
16Jul2017 11:23:57'	0.67875	0.159867	0.597783	158.642	929.5		0.586	0.10685	0.528719	85.4556	358
16Jul2017 11:33:58'	0.666	0.151242	0.597783	160	964.5		0.58675	0.0986921	0.528719	87.4929	424.25
16Jul2017 11:43:58'	0.639	0.133411	0.597783	162.988	997.5		0.495	0.173825	0.528719	92.1335	546.25
16Jul2017 11:53:58'	0.599	0.0969164	0.597783	164.075	1028.25		0.3995	0.273411	0.528719	91.0017	641
16Jul2017 12:03:58'	0.54625	0.0465811	0.597783	164.89	1059.5		0.3075	0.369463	0.528719	89.8698	649
16Jul2017 12:13:57'	0.4835	0.0154423	0.597783	165.161	1091.5		0.213	0.472115	0.528719	87.6061	625.75
16Jul2017 12:23:57'	0.4175	0.0905672	0.597783	162.173	1120.75		0.2495	0.451456	0.528719	83.1918	644
16Jul2017 12:33:57'	0.3545	0.110722	0.597783	176.299	1130		0.25525	0.427464	0.528719	88.2852	644.5
16Jul2017 12:43:58'	0.304	0.163717	0.597783	175.484	1198		0.24225	0.448607	0.528719	86.0215	689.25
16Jul2017 12:53:58'	0.267	0.222193	0.597783	168.421	1262.25		0.22775	0.472472	0.528719	83.4182	756.25
16Jul2017 13:03:58'	0.25225	0.237697	0.597783	168.149	1310.75		0.19475	0.514497	0.528719	80.9281	768.75
16Jul2017 13:13:58'	0.25325	0.282882	0.597783	152.937	1382.25		0.192	0.537548	0.528719	75.2688	794.5
16Jul2017 13:23:57'	0.25425	0.281915	0.597783	152.937	1398.75		0.214	0.513919	0.528719	75.7216	777
16Jul2017 13:33:57'	0.2595	0.251905	0.597783	161.087	1436		0.22825	0.494367	0.528719	77.193	766.25
16Jul2017 13:43:57'	0.26825	0.252308	0.597783	158.098	1514.5		0.2305	0.488821	0.528719	78.0985	774.5
16Jul2017 13:53:58'	0.27275	0.236283	0.597783	161.902	1471.75		0.24725	0.46309	0.528719	80.5886	719.75
16Jul2017 14:03:58'	0.27725	0.238322	0.597783	159.728	1518.5		0.24575	0.464977	0.528719	80.4754	731.25
16Jul2017 14:13:58'	0.35475	0.161708	0.597783	159.457	1209.5		0.31325	0.387298	0.528719	83.305	590.75
16Jul2017 14:23:58'	0.4245	0.0744769	0.597783	165.161	913.25		0.36	0.332462	0.528719	85.5687	472.75
16Jul2017 14:33:57'	0.46	0.0390947	0.597783	165.161	727.5		0.37175	0.322444	0.528719	85.116	431.75
16Jul2017 14:43:57'	0.47025	0.020593	0.597783	167.878	604.75		0.38125	0.30808	0.528719	86.4742	396
16Jul2017 14:53:57'	0.47975	0.0136206	0.597783	167.063	599		0.3895	0.303108	0.528719	85.5687	389.5
16Jul2017 15:03:57'	0.47075	0.022062	0.597783	167.334	554.75		0.3975	0.299482	0.528719	84.3237	357.75
16Jul2017 15:13:58'	0.45025	0.042506	0.597783	167.334	699.75		0.399	0.305215	0.528719	82.2863	427.25
16Jul2017 15:23:58'	0.4805	0.0106314	0.597783	167.878	637		0.4185	0.284903	0.528719	82.5127	405.5
16Jul2017 15:33:58'	0.43875	0.056536	0.597783	166.519	788		0.38675	0.323562	0.528719	80.5886	497
16Jul2017 15:43:58'	0.4235	0.0708295	0.597783	166.791	946.75		0.3755	0.341331	0.528719	78.7776	583.25
16Jul2017 15:53:57'	0.495	0.00511788	0.597783	164.89	736.75		0.42475	0.285947	0.528719	80.4754	455
16Jul2017 16:03:57'	0.5215	0.0336788	0.597783	168.964	713.5		0.441	0.27454	0.528719	79.1171	428.25
16Jul2017 16:13:57'	0.55925	0.085632	0.597783	173.582	681		0.45775	0.248774	0.528719	81.6072	396.75
16Jul2017 16:23:58'	0.597	0.128496	0.597783	175.212	610.75		0.48525	0.211107	0.528719	84.4369	345.75
16Jul2017 16:33:58'	0.6105	0.138874	0.597783	174.126	584		0.50375	0.194803	0.528719	83.871	330.25
16Jul2017 16:43:58'	0.64725	0.161016	0.597783	169.236	418.5		0.55575	0.139146	0.528719	84.8896	236
16Jul2017 16:53:58'	0.66275	0.175469	0.597783	168.964	356.25		0.587	0.112871	0.528719	83.5314	162
16Jul2017 17:03:57'	0.67625	0.178955	0.597783	165.705	308.75		0.612	0.092075	0.528719	82.3995	124.5
16Jul2017 17:13:57'	0.668	0.177873	0.597783	168.149	386.5		0.612	0.092075	0.528719	82.3995	146
16Jul2017 17:23:57'	0.66375	0.17673	0.597783	169.236	445		0.61525	0.0888478	0.528719	82.3995	154.25
16Jul2017 17:33:58'	0.672	0.18112	0.597783	167.878	396.5		0.63375	0.0706374	0.528719	82.2863	147.75
16Jul2017 17:43:58'	0.6775	0.18573	0.597783	167.606	345.25		0.643	0.0645271	0.528719	81.3809	120.25
16Jul2017 17:53:58'	0.6845	0.187832	0.597783	165.976	295.25		0.653	0.0576781	0.528719	80.4754	100
16Jul2017 18:03:58'	0.69075	0.193137	0.597783	165.705	249.25		0.66075	0.0515909	0.528719	80.0226	88.75
16Jul2017 18:13:57'	0.69625	0.196762	0.597783	165.161	203		0.66725	0.0468179	0.528719	79.5699	83.25
16Jul2017 18:23:57'	0.7	0.19559	0.597783	163.531	166.5		0.6765	0.039116	0.528719	79.1171	79.75
16Jul2017 18:33:57'	0.709	0.195475	0.597783	160.543	144.5		0.68175	0.0375588	0.528719	78.0985	80.5
16Jul2017 18:43:57'	0.71725	0.197212	0.597783	158.37	133.25		0.6915	0.0322834	0.528719	76.8534	75.5
16Jul2017 18:53:58'	0.72525	0.193014	0.597783	154.295	133.5		0.69925	0.0285122	0.528719	75.7216	69.5
16Jul2017 19:03:58'	0.7345	0.193902	0.597783	151.579	116.5		0.708	0.0248587	0.528719	74.3633	64.25
16Jul2017 19:13:58'	0.741	0.195521	0.597783	149.949	92.5		0.71525	0.0195761	0.528719	73.7974	55.25
16Jul2017 19:23:58'	0.74875	0.195992	0.597783	147.504	66.75		0.72125	0.0158991	0.528719	73.1183	51.5
16Jul2017 19:33:57'	0.757	0.196141	0.597783	144.788	40.5		0.72625	0.0133802	0.528719	72.4392	44.75
16Jul2017 19:43:57'	0.7645	0.19653	0.597783	142.343	33.5		0.732	0.011223	0.528719	71.4205	36.75
16Jul2017 19:53:57'	0.77175	0.198	0.597783	140.441	26.5		0.7405	0.00896406	0.528719	69.7227	28.5
16Jul2017 20:03:58'	0.781	0.199192	0.597783	137.725	19.75		0.75075	0.00645359	0.528719	67.5721	20
16Jul2017 20:13:58'	0.793	0.206046	0.597783	136.095	13.25		0.76575	0.000512609	0.528719	65.082	13.75
16Jul2017 20:23:58'	0.806	0.214522	0.597783	134.737	8		0.78325	0.00928772	0.528719	62.9315	8.25
16Jul2017 20:33:58'	0.81975	0.219239	0.597783	131.749	4		0.8	0.0184743	0.528719	60.781	4.25
16Jul2017 20:43:57'	0.83175	0.2204	0.597783	128.217	1.5		0.8135	0.0254729	0.528719	58.97	1.5
16Jul2017 20:53:57'	0.838	0.215081	0.597783	124.414	0.25		0.82225	0.0286619	0.528719	57.3854	0
16Jul2017 21:03:57'	0.84125	0.204782	0.597783	119.796	0.25		0.82675	0.0275439	0.528719	55.8008	0.75
16Jul2017 21:13:58'	0.843	0.195048	0.597783	115.993	0.5		0.829	0.0261959	0.528719	54.7821	1
16Jul2017 21:23:58'	0.84275	0.184712	0.597783	112.733	0.75		0.83025	0.0253064	0.528719	54.2162	0.75
16Jul2017 21:33:58'	0.8425	0.174426	0.597783	109.474	0.5		0.8315	0.0245011	0.528719	53.6502	0.75
16Jul2017 21:43:58'	0.84325	0.170097	0.597783	107.844	0.75		0.832	0.024088	0.528719	53.4239	0.75
16Jul2017 21:53:57'	0.8435	0.124498	0.597783	104.312	0.75		0.83225	0.0178076	0.528719	53.1975	0.5
16Jul2017 22:03:57'	0.84425	0.0817315	0.597783	99.966	0.75		0.83275	0.0116648	0.528719	52.8579	0.75
16Jul2017 22:13:57'	0.84525	0.0420817	0.597783	96.163	1		0.83275	0.00579844	0.528719	52.7448	0.75
16Jul2017 22:23:57'	0.845	0	0.597783	90.73	0.75		0.83325	0	0.528719	52.4052	0.5
16Jul2017 22:33:58'	0.8455	0	0.597783	86.6553	0.5		0.833	0	0.528719	52.292	0.75
16Jul2017 22:43:58'	0.8445	0	0.597783	84.7538	0.5		0.83275	0	0.528719	52.292	0.75
16Jul2017 22:53:58'	0.8445	0	0.597783	82.309	0.5		0.83225	0	0.528719	52.292	0.75
16Jul2017 23:03:58'	0.84375	0	0.597783	81.494	0.5		0.831	0	0.528719	52.5184	0.75
16Jul2017 23:13:57'	0.84375	0	0.597783	80.6791	0.5		0.83075	0	0.528719	52.5184	0.75
16Jul2017 23:23:57'	0.84525	0	0.597783	78.2343	0.5		0.8305	0	0.528719	52.292	0.75
16Jul2017 23:33:57'	0.84475	0	0.597783	76.876	0.25		0.831	0	0.528719	51.8393	0.75
16Jul2017 23:43:58'	0.8445	0	0.597783	74.9745	0.5		0.83025	0	0.528719	51.8393	1
16Jul2017 23:53:58'	0.8445	0	0.597783	72.5297	0.75		0.82925	0	0.528719	51.7261	1
17Jul2017 00:03:58'	0.84475	0	0.597783	70.8998	0.5		0.82875	0	0.528719	51.7261	1
17Jul2017 00:13:58'	0.843	0	0.597783	70.0849	0.75		0.8275	0	0.528719	51.9525	1
17Jul2017 00:23:57'	0.844	0	0.597783	68.1834	0.75		0.82775	0	0.528719	51.6129	1
17Jul2017 00:33:57'	0.8425	0	0.597783	67.0968	0.75		0.82825	0	0.528719	50.7074	0.75
17Jul2017 00:43:57'	0.84125	0	0.597783	64.9236	1		0.82725	0	0.528719	49.236	0.75
17Jul2017 00:53:58'	0.8425	0.000246661	0.583293	61.9275	1		0.827	0.00348142	0.528335	47.419	0.75
17Jul2017 01:03:58'	0.84325	0.000504517	0.568803	60.0179	1		0.82625	0.00515841	0.527952	46.3939	0.75
17Jul2017 01:13:58'	0.84525	0.00431546	0.554314	59.7377	1		0.82525	0.00249233	0.527569	47.2922	1
17Jul2017 01:23:58'	0.8455	0.00923769	0.539824	61.6302	0.75		0.8255	0.000566711	0.527185	48.8697	1
17Jul2017 01:33:57'	0.84375	0.0166666	0.539824	65.1597	0.5		0.8255	0.00786112	0.527185	50.906	1
17Jul2017 01:43:57'	0.843	0.0237583	0.539824	68.1461	0.5		0.8255	0.0131114	0.527185	52.3766	1
17Jul2017 01:53:57'	0.84225	0.0271819	0.539824	69.7751	0.5		0.8255	0.0138249	0.527185	52.6028	1
17Jul2017 02:03:57'	0.84225	0.0292039	0.539824	70.5896	0.5		0.82475	0.0136624	0.527185	52.716	1
17Jul2017 02:13:58'	0.843	0.0277973	0.539824	69.7751	0.75		0.82375	0.0127459	0.527185	52.716	1
17Jul2017 02:23:58'	0.8425	0.0250535	0.539824	68.9606	0.75		0.82325	0.0114233	0.527185	52.4897	1
17Jul2017 02:33:58'	0.8415	0.0206604	0.539824	67.6031	0.75		0.82275	0.00900807	0.527185	51.9241	1
17Jul2017 02:43:58'	0.8425	0.0130396	0.539824	64.3452	1		0.82275	0.0057071	0.527185	51.0191	1
17Jul2017 02:53:57'	0.8435	0.00554766	0.539824	61.0872	1		0.823	0.00019641	0.527185	49.4354	0.75
17Jul2017 03:03:57'	0.84375	0.00205918	0.539824	58.1007	1		0.82225	0.00647929	0.527185	47.7385	0.75
17Jul2017 03:13:57'	0.84375	0.0051505	0.539824	57.0147	1		0.82175	0.00829286	0.527185	47.3991	0.75
17Jul2017 03:23:58'	0.842	0.00243382	0.539824	58.6437	1		0.82125	0.0061203	0.527185	48.191	0.75
17Jul2017 03:33:58'	0.84175	0.00153731	0.539824	60.2727	1		0.82	0.00164488	0.527185	49.7747	1
17Jul2017 03:43:58'	0.84175	0.00504196	0.539824	61.6302	1		0.81975	0.00405433	0.527185	51.4716	1
17Jul2017 03:53:58'	0.84225	0.0050451	0.539824	61.3587	1		0.82	0.0054379	0.527185	51.811	1
17Jul2017 04:03:57'	0.84125	0.00192734	0.539824	60.5442	1		0.81975	0.00376931	0.527185	51.3585	1
17Jul2017 04:13:57'	0.84	0.00210939	0.539824	59.4582	1		0.82025	0.000555617	0.527185	50.3404	1
17Jul2017 04:23:57'	0.8385	0.00500563	0.539824	58.9152	0.75		0.8205	0.00310025	0.527185	49.2091	1
17Jul2017 04:33:58'	0.83825	0.00603116	0.539824	58.6437	0.5		0.8205	0.00593052	0.527185	48.4172	1
17Jul2017 04:43:58'	0.83925	0.00520326	0.539824	58.6437	0.5		0.821	0.00593163	0.527185	48.3041	1
17Jul2017 04:53:58'	0.841	0.00220607	0.539824	59.1867	0.5		0.82	0.00284575	0.527185	49.4354	1
17Jul2017 05:03:58'	0.84125	0.00235507	0.539824	60.8157	0.75		0.81925	0.00119516	0.527185	50.7929	1
17Jul2017 05:13:57'	0.8405	0.00662045	0.539824	62.7162	1		0.81725	0.00511072	0.527185	52.3766	1
17Jul2017 05:23:57'	0.8395	0.0101354	0.539824	64.3452	0.75		0.81425	0.00704312	0.527185	53.7341	1
17Jul2017 05:33:57'	0.83675	0.0126261	0.539824	66.2456	0.75		0.81075	0.00789455	0.527185	54.9785	1
17Jul2017 05:43:57'	0.834	0.0149247	0.539824	68.1461	0.25		0.80475	0.00869962	0.527185	56.9016	0.75
17Jul2017 05:53:58'	0.82975	0.0157534	0.539824	70.0466	0.75		0.797	0.00605149	0.527185	58.3722	0.5
17Jul2017 06:03:58'	0.82325	0.0106943	0.539824	70.5896	2		0.78675	0.00193908	0.527185	59.0509	2.75
17Jul2017 06:13:58'	0.81625	0.0013461	0.539824	69.7751	4.25		0.774	0.0170555	0.527185	58.3722	5.75
17Jul2017 06:23:58'	0.80675	0.013062	0.539824	67.8746	6.5		0.76225	0.0371946	0.527185	55.9966	9.75
17Jul2017 06:33:57'	0.7965	0.0270053	0.539824	66.5171	9.5		0.749	0.0561226	0.527185	54.4128	15.75
17Jul2017 06:43:57'	0.78825	0.0367502	0.539824	65.9741	13.5		0.73275	0.0779606	0.527185	52.8291	28.5
17Jul2017 06:53:57'	0.779	0.0458396	0.539824	65.9741	17		0.71725	0.0991917	0.527185	51.2454	40.25
17Jul2017 07:03:58'	0.77275	0.0500179	0.539824	66.7886	20.25		0.7025	0.114337	0.527185	51.1322	46.75
17Jul2017 07:13:58'	0.7715	0.0505716	0.539824	67.0601	23		0.693	0.124652	0.527185	50.906	53.25
17Jul2017 07:23:58'	0.77025	0.0490335	0.539824	68.1461	25		0.68775	0.126624	0.527185	51.811	54
17Jul2017 07:33:58'	0.76875	0.0470151	0.539824	69.5036	32.5		0.681	0.130931	0.527185	52.4897	65.25
17Jul2017 07:43:57'	0.763	0.0477836	0.539824	71.4041	44.25		0.66225	0.150122	0.527185	52.3766	88.25
17Jul2017 07:53:57'	0.75575	0.0333159	0.539824	79.5491	54		0.643	0.161577	0.527185	54.526	105.5
17Jul2017 08:03:57'	0.75325	0.00754327	0.539824	95.839	63		0.6235	0.159134	0.527185	60.6347	116.5
17Jul2017 08:13:58'	0.754	0.0574541	0.539824	114.301	66		0.61325	0.143383	0.527185	67.8746	117.25
17Jul2017 08:23:58'	0.7615	0.112384	0.539824	132.22	62.75		0.6175	0.110721	0.527185	75.7933	110.75
17Jul2017 08:33:58'	0.76575	0.150365	0.539824	144.98	61.75		0.62125	0.0887935	0.527185	80.8839	115.25
17Jul2017 08:43:58'	0.7665	0.159074	0.539824	147.967	62.75		0.617	0.08262	0.527185	83.8252	133.25
17Jul2017 08:53:57'	0.76425	0.164715	0.539824	150.953	64.25		0.578	0.102656	0.527185	89.142	173.75
17Jul2017 09:03:57'	0.75925	0.165566	0.539824	153.125	73.75		0.52625	0.136182	0.527185	94.2326	228
17Jul2017 09:13:57'	0.75625	0.163226	0.539824	153.397	84		0.50925	0.143371	0.527185	96.9476	241.75
17Jul2017 09:23:57'	0.75225	0.164851	0.539824	155.569	91.25		0.46075	0.180848	0.527185	100.002	287.75
17Jul2017 09:33:58'	0.751	0.162143	0.539824	155.026	93		0.444	0.19664	0.527185	100.228	293.75
17Jul2017 09:43:58'	0.75125	0.161798	0.539824	154.754	90.25		0.4375	0.203181	0.527185	100.228	278.75
17Jul2017 09:53:58'	0.74975	0.164581	0.539824	156.383	85.25		0.41	0.22864	0.527185	100.794	286.25
17Jul2017 10:03:58'	0.747	0.16395	0.539824	157.198	83.75		0.44525	0.208023	0.527185	96.7214	239.5
17Jul2017 10:13:57'	0.74575	0.165488	0.539824	158.284	87		0.472	0.190661	0.527185	94.1195	216
17Jul2017 10:23:57'	0.73875	0.164159	0.539824	160.456	85.75		0.52725	0.15153	0.527185	89.5945	185
17Jul2017 10:33:57'	0.73425	0.162842	0.539824	161.542	90.75		0.56575	0.119683	0.527185	87.7845	173.75
17Jul2017 10:43:58'	0.7315	0.161417	0.539824	162.085	95.75		0.58325	0.103711	0.527185	87.332	172.25
17Jul2017 10:53:58'	0.72625	0.159912	0.539824	163.442	103		0.61125	0.081455	0.527185	85.7483	165.5
17Jul2017 11:03:58'	0.7295	0.158799	0.539824	161.813	112.5		0.61575	0.0770981	0.527185	85.7483	171.75
17Jul2017 11:13:58'	0.728	0.157699	0.539824	162.085	119.75		0.61875	0.0747643	0.527185	85.522	167.25
17Jul2017 11:23:57'	0.72825	0.155799	0.539824	161.27	126.75		0.62025	0.0730101	0.527185	85.6352	169.25
17Jul2017 11:33:57'	0.729	0.154186	0.539824	160.456	130		0.6135	0.0781335	0.527185	86.0877	163.25
17Jul2017 11:43:57'	0.71375	0.148207	0.539824	163.985	143.5		0.596	0.0931807	0.527185	86.7664	176.75
17Jul2017 11:53:58'	0.70325	0.140164	0.539824	164.8	167.5		0.5795	0.108889	0.527185	86.9927	209.75
17Jul2017 12:03:58'	0.698	0.139264	0.539824	166.429	187.25		0.57325	0.115564	0.527185	86.8795	247.25
17Jul2017 12:13:58'	0.6855	0.134757	0.539824	169.415	211		0.55625	0.132453	0.527185	86.8795	369.25
17Jul2017 12:23:58'	0.69475	0.142605	0.539824	168.872	234.25		0.55575	0.131355	0.527185	87.332	494.5
17Jul2017 12:33:57'	0.6965	0.141235	0.539824	167.786	258.75		0.4905	0.204357	0.527185	85.1827	587.25
17Jul2017 12:43:57'	0.69625	0.134607	0.539824	165.343	247.25		0.465	0.228991	0.527185	85.4089	559
17Jul2017 12:53:57'	0.7085	0.135914	0.539824	161.27	244		0.4695	0.224484	0.527185	85.4089	467.25
17Jul2017 13:03:57'	0.7075	0.128725	0.539824	158.827	238		0.46475	0.228371	0.527185	85.6352	359.25
17Jul2017 13:13:58'	0.71625	0.133935	0.539824	157.469	214.75		0.5265	0.160934	0.527185	87.2189	257.75
17Jul2017 13:23:58'	0.71825	0.13887	0.539824	158.555	352.25		0.477	0.207943	0.527185	87.8977	367.5
17Jul2017 13:33:58'	0.712	0.13567	0.539824	159.641	499.75		0.4215	0.265957	0.527185	87.2189	450
17Jul2017 13:43:58'	0.70525	0.130743	0.539824	160.456	721.75		0.3495	0.35334	0.527185	82.9202	559
17Jul2017 13:53:57'	0.703	0.128589	0.539824	160.456	706.25		0.363	0.34989	0.527185	80.0921	537.75
17Jul2017 14:03:57'	0.708	0.130547	0.539824	159.37	549.5		0.45325	0.277422	0.527185	75.1146	402.5
17Jul2017 14:13:57'	0.7195	0.137742	0.539824	157.741	372.75		0.53675	0.206958	0.527185	71.4946	280.75
17Jul2017 14:23:58'	0.733	0.152698	0.539824	158.284	136.5		0.615	0.112831	0.527185	75.9065	166.75
17Jul2017 14:33:58'	0.725	0.144712	0.539824	158.284	147.75		0.58375	0.139664	0.527185	77.1508	214.25
17Jul2017 14:43:58'	0.7075	0.136771	0.539824	161.813	275		0.514	0.2067	0.527185	77.9427	335.25
17Jul2017 14:53:58'	0.6185	0.0693272	0.539824	169.958	537.5		0.44025	0.275943	0.527185	79.1871	472
17Jul2017 15:03:57'	0.60075	0.049615	0.539824	169.144	547		0.44225	0.287446	0.527185	75.454	460
17Jul2017 15:13:57'	0.528	0.00563086	0.539824	180.004	732.75		0.41375	0.315591	0.527185	75.5671	522.25
17Jul2017 15:23:57'	0.47475	0.0254708	0.539824	188.42	806		0.41725	0.306762	0.527185	77.0377	515
17Jul2017 15:33:58'	0.49875	0.0106727	0.539824	193.035	718		0.4325	0.289463	0.527185	77.6033	481
17Jul2017 15:43:58'	0.5095	0.013321	0.539824	190.049	703.25		0.436	0.287856	0.527185	77.0377	467.25
17Jul2017 15:53:58'	0.593	0.0657984	0.539824	178.375	488.75		0.50475	0.22592	0.527185	75.1146	345.25
17Jul2017 16:03:58'	0.64325	0.11167	0.539824	176.746	325		0.56	0.168235	0.527185	75.7933	256
17Jul2017 16:13:57'	0.70675	0.140005	0.539824	163.442	150.25		0.618	0.118267	0.527185	73.5309	152.75
17Jul2017 16:23:57'	0.71425	0.151081	0.539824	164.8	131.75		0.6345	0.104244	0.527185	72.8521	136
17Jul2017 16:33:57'	0.7205	0.154513	0.539824	163.714	122.25		0.64675	0.0968708	0.527185	71.4946	122.25
17Jul2017 16:43:57'	0.754	0.155072	0.539824	151.225	66.25		0.6805	0.0802634	0.527185	66.7434	75.75
17Jul2017 16:53:58'	0.759	0.158765	0.539824	150.682	50.25		0.697	0.0694637	0.527185	65.1597	57
17Jul2017 17:03:58'	0.76725	0.161979	0.539824	148.781	37.5		0.7105	0.0608211	0.527185	63.8022	43.25
17Jul2017 17:13:58'	0.7735	0.166556	0.539824	148.238	32.5		0.72325	0.050534	0.527185	63.1234	36
17Jul2017 17:23:58'	0.7695	0.163924	0.539824	148.781	40.5		0.719	0.0535617	0.527185	63.4628	43.25
17Jul2017 17:33:57'	0.775	0.165041	0.539824	147.152	44.75		0.7225	0.0492326	0.527185	63.689	48
17Jul2017 17:43:57'	0.76725	0.161916	0.539824	148.781	63.25		0.712	0.0531825	0.527185	65.499	66.5
17Jul2017 17:53:57'	0.75025	0.158239	0.539824	153.668	98.5		0.68925	0.0682217	0.527185	67.6484	115.75
17Jul2017 18:03:58'	0.7375	0.152732	0.539824	156.383	144.75		0.66925	0.0820151	0.527185	69.3453	154
17Jul2017 18:13:58'	0.7245	0.149718	0.539824	160.184	178.75		0.6535	0.0929377	0.527185	70.7027	178
17Jul2017 18:23:58'	0.72075	0.151678	0.539824	162.356	191.75		0.657	0.0935815	0.527185	69.5715	170.75
17Jul2017 18:33:58'	0.72975	0.150521	0.539824	158.555	182.25		0.6735	0.0830964	0.527185	67.8746	128.75
17Jul2017 18:43:57'	0.73725	0.1537	0.539824	156.926	150.75		0.6945	0.0690041	0.527185	65.9515	92.75
17Jul2017 18:53:57'	0.74625	0.154586	0.539824	153.94	116.25		0.71	0.0588865	0.527185	64.4809	68.75
17Jul2017 19:03:57'	0.7565	0.155288	0.539824	150.41	86.5		0.72	0.0529148	0.527185	63.3497	59.75
17Jul2017 19:13:57'	0.764	0.157703	0.539824	148.51	59.5		0.728	0.0478509	0.527185	62.5578	53
17Jul2017 19:23:58'	0.77075	0.158626	0.539824	146.338	40		0.7305	0.0454522	0.527185	62.5578	46.75
17Jul2017 19:33:58'	0.774	0.159749	0.539824	145.523	35.75		0.734	0.0439356	0.527185	61.9922	41.75
17Jul2017 19:43:58'	0.77925	0.160601	0.539824	143.894	30		0.74075	0.0399441	0.527185	61.2003	34.5
17Jul2017 19:53:57'	0.78675	0.165094	0.539824	142.808	23.5		0.74875	0.0354948	0.527185	60.1822	27
17Jul2017 20:03:57'	0.79725	0.175164	0.539824	142.537	17.25		0.76075	0.0270159	0.527185	59.1641	19.75
17Jul2017 20:13:57'	0.8095	0.186249	0.539824	141.994	10.5		0.77575	0.0140901	0.527185	58.5984	12.5
17Jul2017 20:23:57'	0.82175	0.195729	0.539824	140.908	5.5		0.7935	2.86378e-05	0.527185	57.5803	6.75
17Jul2017 20:33:58'	0.832	0.200743	0.539824	139.007	2.75		0.808	0.0119318	0.527185	56.9016	3.25
17Jul2017 20:43:58'	0.8395	0.198106	0.539824	135.206	0.75		0.82	0.0190675	0.527185	55.5441	1.25
17Jul2017 20:53:58'	0.844	0.191911	0.539824	131.134	0		0.8275	0.0202591	0.527185	53.7341	0.25
17Jul2017 21:03:58'	0.84725	0.184545	0.539824	127.061	0.25		0.8305	0.0188286	0.527185	52.4897	0
17Jul2017 21:13:57'	0.84875	0.178213	0.539824	124.075	0.25		0.8325	0.0171506	0.527185	51.4716	0.25
17Jul2017 21:23:57'	0.84875	0.173211	0.539824	122.174	0		0.83275	0.0157574	0.527185	51.0191	0.5
17Jul2017 21:33:57'	0.84925	0.16981	0.539824	120.817	0		0.83225	0.0151974	0.527185	51.0191	0.75
17Jul2017 21:43:58'	0.84875	0.168507	0.539824	120.545	0.25		0.832	0.0149474	0.527185	51.0191	0.75
17Jul2017 21:53:58'	0.84875	0.125795	0.539824	119.459	0.5		0.83225	0.0111765	0.527185	50.7929	0.5
17Jul2017 22:03:58'	0.84875	0.0834087	0.539824	116.744	0.5		0.83175	0.00733746	0.527185	50.6797	0.25
17Jul2017 22:13:58'	0.848	0.0417355	0.539824	114.572	0.5		0.83225	0.00349845	0.527185	50.2272	0.25
17Jul2017 22:23:57'	0.84925	0	0.539824	109.957	0.25		0.8325	0	0.527185	49.8879	0.5
17Jul2017 22:33:57'	0.8495	0	0.539824	104.255	0.25		0.8325	0	0.527185	49.5485	0.75
17Jul2017 22:43:57'	0.8495	0	0.539824	100.183	0.25		0.83325	0	0.527185	48.9829	1
17Jul2017 22:53:58'	0.84975	0	0.539824	95.296	0.25		0.833	0	0.527185	48.8697	0.75
17Jul2017 23:03:58'	0.849	0	0.539824	92.3095	0.25		0.833	0	0.527185	48.6435	0.75
17Jul2017 23:13:58'	0.848	0	0.539824	92.581	0		0.83275	0	0.527185	48.5304	0.75
17Jul2017 23:23:58'	0.848	0	0.539824	90.1375	0.25		0.833	0	0.527185	48.4172	0.75
17Jul2017 23:33:57'	0.84775	0	0.539824	87.9655	0.25		0.833	0	0.527185	48.3041	1
17Jul2017 23:43:57'	0.8475	0	0.539824	84.979	0.5		0.832	0	0.527185	47.9647	1
17Jul2017 23:53:57'	0.848	0	0.539824	78.7346	0.5		0.8315	0	0.527185	47.7385	0.75
18Jul2017 00:03:57'	0.849	0	0.539824	75.2051	0.5		0.8305	0	0.527185	47.8516	0.75
18Jul2017 00:13:58'	0.849	0	0.539824	73.3046	0.75		0.8295	0	0.527185	48.0779	0.75
18Jul2017 00:23:58'	0.84975	0	0.539824	71.6756	0.75		0.8295	0	0.527185	48.3041	0.75
18Jul2017 00:33:58'	0.84925	0	0.539824	71.9471	1		0.82975	0	0.527185	48.191	0.75
18Jul2017 00:43:58'	0.848	0	0.539824	72.4901	0.75		0.82975	0	0.527185	48.0779	0.75
18Jul2017 00:53:57'	0.8485	0.00156928	0.524431	70.5804	0.5		0.8295	0.000991709	0.529782	47.732	0.75
18Jul2017 01:03:57'	0.84825	0.00284238	0.509037	69.2139	0.25		0.82925	0.00198342	0.532378	47.7254	0.5
18Jul2017 01:13:57'	0.849	0.00393216	0.493644	67.8474	0.25		0.8285	0.00333162	0.534975	48.0582	0.75
18Jul2017 01:23:58'	0.84875	0.00445335	0.47825	66.4809	0.25		0.828	0.00432333	0.537571	48.0516	0.75
18Jul2017 01:33:58'	0.8485	0.0030157	0.47825	65.9382	0.5		0.82775	0.00389882	0.537571	48.0516	0.75
18Jul2017 01:43:58'	0.848	0.00255	0.47825	65.9382	0.75		0.82725	0.00326119	0.537571	48.0516	1
18Jul2017 01:53:58'	0.8475	0.00139838	0.47825	65.6668	0.75		0.82675	0.00226707	0.537571	47.9386	1
18Jul2017 02:03:57'	0.84725	0.00179301	0.47825	65.9382	0.75		0.82625	0.00170158	0.537571	47.9386	0.75
18Jul2017 02:13:57'	0.8475	0.000641339	0.47825	65.3955	0.75		0.8255	0.00149254	0.537571	48.0516	0.75
18Jul2017 02:23:57'	0.84725	0.000325058	0.47825	65.1241	0.75		0.82525	0.000406429	0.537571	47.8255	0.75
18Jul2017 02:33:58'	0.8475	0.000131582	0.47825	65.1241	0.75		0.825	0.000118292	0.537571	47.8255	0.5
18Jul2017 02:43:58'	0.84825	0.000724827	0.47825	64.5814	1		0.8245	0.000779809	0.537571	48.1647	0.75
18Jul2017 02:53:58'	0.848	0.00168181	0.47825	65.6668	1		0.82475	0.0015032	0.537571	48.2778	0.5
18Jul2017 03:03:58'	0.849	0.00405173	0.47825	66.2095	0.75		0.82425	0.00244867	0.537571	48.617	0.5
18Jul2017 03:13:57'	0.849	0.00414827	0.47825	66.2095	0.75		0.82375	0.00259617	0.537571	48.73	0.75
18Jul2017 03:23:57'	0.8485	0.00424971	0.47825	66.4809	0.75		0.8235	0.00172189	0.537571	48.5039	0.75
18Jul2017 03:33:57'	0.84675	0.00300081	0.47825	66.7522	0.75		0.823	0.000707039	0.537571	48.3908	1
18Jul2017 03:43:57'	0.8455	0.00102107	0.47825	66.4809	0.75		0.8225	0.000857853	0.537571	48.617	1
18Jul2017 03:53:58'	0.84625	0.00167898	0.47825	66.4809	0.75		0.82225	0.000932846	0.537571	48.73	1
18Jul2017 04:03:58'	0.8465	0.00080739	0.47825	65.9382	0.75		0.82125	0.00131323	0.537571	48.3908	1
18Jul2017 04:13:58'	0.84775	0.000468418	0.47825	64.8528	0.75		0.82075	0.00212869	0.537571	48.2778	0.75
18Jul2017 04:23:58'	0.8485	0.00162373	0.47825	64.0387	1		0.8205	0.0023505	0.537571	48.2778	0.75
18Jul2017 04:33:57'	0.8485	0.00294856	0.47825	63.496	1		0.82075	0.00249887	0.537571	48.1647	0.75
18Jul2017 04:43:57'	0.8485	0.00304509	0.47825	63.496	1		0.8215	0.000620516	0.537571	48.5039	0.75
18Jul2017 04:53:57'	0.84975	0.00244036	0.47825	63.2247	1		0.8215	4.72942e-05	0.537571	48.73	1
18Jul2017 05:03:58'	0.84875	0.00148043	0.47825	64.0387	1		0.82125	0.00107737	0.537571	48.5039	1
18Jul2017 05:13:58'	0.8485	0.00100704	0.47825	64.3101	1		0.82	0.00152608	0.537571	48.73	1
18Jul2017 05:23:58'	0.8455	0.000737529	0.47825	65.6668	1		0.8175	0.00145681	0.537571	49.4084	1
18Jul2017 05:33:58'	0.842	0.000270035	0.47825	67.2949	0.75		0.815	0.000129447	0.537571	50.426	0.75
18Jul2017 05:43:57'	0.83775	0.000498557	0.47825	69.4657	0.25		0.81025	0.00233754	0.537571	52.348	0.5
18Jul2017 05:53:57'	0.83075	0.000851559	0.47825	71.9079	0.5		0.805	0.000811614	0.537571	52.9133	0.25
18Jul2017 06:03:57'	0.8255	0.00488152	0.47825	72.4506	1.75		0.7975	0.00796424	0.537571	53.0264	1.75
18Jul2017 06:13:58'	0.81825	0.0109902	0.47825	72.9933	3.25		0.788	0.0200405	0.537571	52.348	3.75
18Jul2017 06:23:58'	0.8105	0.021804	0.47825	71.6365	5		0.77775	0.0378184	0.537571	50.3129	6.75
18Jul2017 06:33:58'	0.80225	0.0331704	0.47825	70.2798	7.25		0.76475	0.0554056	0.537571	49.0692	10.25
18Jul2017 06:43:58'	0.79575	0.0428879	0.47825	68.923	9.5		0.75225	0.0741742	0.537571	47.3733	14
18Jul2017 06:53:57'	0.7895	0.0527878	0.47825	67.2949	11.75		0.73925	0.0937719	0.537571	45.5643	18.25
18Jul2017 07:03:57'	0.78375	0.0586585	0.47825	67.2949	14.25		0.72925	0.108823	0.537571	44.2075	24.75
18Jul2017 07:13:57'	0.7795	0.0617075	0.47825	67.8376	16.75		0.71925	0.124598	0.537571	42.6246	33.75
18Jul2017 07:23:57'	0.7725	0.0623539	0.47825	70.5511	19.5		0.71075	0.138914	0.537571	41.0418	41
18Jul2017 07:33:58'	0.771	0.0544423	0.47825	74.6214	22.75		0.7065	0.145185	0.537571	40.4764	44.5
18Jul2017 07:43:58'	0.77125	0.0326515	0.47825	83.8473	26		0.70325	0.146269	0.537571	41.0418	46.25
18Jul2017 07:53:58'	0.77375	0.00915889	0.47825	100.671	29.25		0.6635	0.165362	0.537571	46.6949	48.5
18Jul2017 08:03:58'	0.77825	0.0567221	0.47825	119.123	32.25		0.66525	0.138625	0.537571	53.4787	48.5
18Jul2017 08:13:57'	0.77725	0.0988171	0.47825	137.575	34.5		0.66375	0.115583	0.537571	60.1494	53.75
18Jul2017 08:23:57'	0.7765	0.126698	0.47825	149.785	36.25		0.6065	0.139324	0.537571	69.3074	81.25
18Jul2017 08:33:57'	0.77625	0.132799	0.47825	152.499	38		0.59	0.133872	0.537571	75.2998	111.75
18Jul2017 08:43:58'	0.77375	0.134434	0.47825	154.127	40		0.58125	0.138904	0.537571	76.3173	126.5
18Jul2017 08:53:58'	0.773	0.134298	0.47825	154.398	42.25		0.577	0.140731	0.537571	76.9957	132
18Jul2017 09:03:58'	0.771	0.134734	0.47825	155.484	44.5		0.60275	0.119048	0.537571	75.8651	122.25
18Jul2017 09:13:58'	0.76775	0.136792	0.47825	157.655	46		0.61675	0.108805	0.537571	74.8475	111.25
18Jul2017 09:23:57'	0.7665	0.137389	0.47825	158.469	47.25		0.603	0.114302	0.537571	77.1088	113.75
18Jul2017 09:33:57'	0.7645	0.138111	0.47825	159.554	48.5		0.5965	0.118424	0.537571	77.7871	121
18Jul2017 09:43:57'	0.76375	0.137332	0.47825	159.554	51		0.61925	0.0999051	0.537571	76.6565	118.75
18Jul2017 09:53:58'	0.75975	0.137646	0.47825	161.454	54.5		0.65425	0.0751457	0.537571	73.8299	108.25
18Jul2017 10:03:58'	0.757	0.137244	0.47825	162.539	58.5		0.66925	0.0658641	0.537571	72.2471	102.75
18Jul2017 10:13:58'	0.75375	0.135941	0.47825	163.353	62.75		0.675	0.0604192	0.537571	72.134	97.75
18Jul2017 10:23:58'	0.74925	0.136012	0.47825	165.252	66.25		0.676	0.0598209	0.537571	72.0209	93
18Jul2017 10:33:57'	0.74925	0.135382	0.47825	164.981	70		0.67625	0.0591037	0.537571	72.134	90.25
18Jul2017 10:43:57'	0.74625	0.133121	0.47825	165.252	75		0.674	0.0610375	0.537571	72.2471	89
18Jul2017 10:53:57'	0.73925	0.132928	0.47825	168.237	82.75		0.66975	0.0644551	0.537571	72.4732	92
18Jul2017 11:03:57'	0.7345	0.130673	0.47825	169.323	91.5		0.66325	0.0697587	0.537571	72.8124	96
18Jul2017 11:13:58'	0.724	0.128498	0.47825	172.85	101.25		0.65375	0.0776284	0.537571	73.2646	101.5
18Jul2017 11:23:58'	0.72075	0.128919	0.47825	174.478	108.75		0.64625	0.0838118	0.537571	73.6038	107
18Jul2017 11:33:58'	0.72475	0.126023	0.47825	171.493	103		0.64575	0.0843396	0.537571	73.6038	100.5
18Jul2017 11:43:58'	0.72175	0.123907	0.47825	171.765	111		0.63825	0.0910027	0.537571	73.8299	108.5
18Jul2017 11:53:57'	0.7255	0.122614	0.47825	169.594	110.25		0.635	0.0930572	0.537571	74.1691	107.75
18Jul2017 12:03:57'	0.72925	0.121453	0.47825	167.423	106.75		0.6425	0.0872891	0.537571	73.7169	100.25
18Jul2017 12:13:57'	0.721	0.119594	0.47825	170.137	131.5		0.608	0.116855	0.537571	75.0736	198
18Jul2017 12:23:58'	0.7275	0.121621	0.47825	168.237	116.25		0.611	0.117065	0.537571	74.1691	186
18Jul2017 12:33:58'	0.72625	0.122886	0.47825	169.323	119.25		0.53425	0.183043	0.537571	77.1088	275.75
18Jul2017 12:43:58'	0.72975	0.123319	0.47825	167.966	107.25		0.535	0.186456	0.537571	75.9781	272.25
18Jul2017 12:53:58'	0.7425	0.127785	0.47825	164.438	73		0.577	0.156071	0.537571	72.8124	168.25
18Jul2017 13:03:57'	0.74675	0.130741	0.47825	163.896	70.75		0.582	0.149803	0.537571	73.1516	171.5
18Jul2017 13:13:57'	0.756	0.13226	0.47825	160.639	52		0.67475	0.075364	0.537571	68.1768	71
18Jul2017 13:23:57'	0.75225	0.132606	0.47825	162.539	63.75		0.66725	0.0770808	0.537571	69.7597	83.75
18Jul2017 13:33:58'	0.75075	0.129263	0.47825	161.725	72.75		0.6595	0.0814976	0.537571	70.6642	94.75
18Jul2017 13:43:58'	0.74875	0.125718	0.47825	161.182	66.25		0.67	0.0781731	0.537571	68.7421	82.5
18Jul2017 13:53:58'	0.75075	0.126415	0.47825	160.639	67.5		0.671	0.0766956	0.537571	68.8552	82.5
18Jul2017 14:03:58'	0.75525	0.0999114	0.47825	147.343	51.25		0.682	0.0751589	0.537571	66.2547	65.75
18Jul2017 14:13:57'	0.753	0.0771869	0.47825	138.66	58.5		0.677	0.078529	0.537571	66.707	72.25
18Jul2017 14:23:57'	0.75375	0.0590413	0.47825	130.52	66		0.67025	0.0848155	0.537571	66.8201	78.75
18Jul2017 14:33:57'	0.75225	0.0416935	0.47825	123.736	75.75		0.65925	0.0949127	0.537571	67.0462	90.25
18Jul2017 14:43:57'	0.74175	0.050803	0.47825	132.148	104		0.6405	0.10714	0.537571	68.8552	119.75
18Jul2017 14:53:58'	0.73525	0.0641843	0.47825	140.56	120.75		0.60375	0.126395	0.537571	73.6038	174
18Jul2017 15:03:58'	0.72375	0.0756852	0.47825	150.328	149.5		0.5875	0.134255	0.537571	75.8651	195.75
18Jul2017 15:13:58'	0.7085	0.0825686	0.47825	159.825	170		0.55925	0.153017	0.537571	78.4655	209.5
18Jul2017 15:23:58'	0.6265	0.0850336	0.47825	195.915	260.75		0.5225	0.170979	0.537571	83.5533	243.75
18Jul2017 15:33:57'	0.622	0.0969142	0.47825	202.97	282.25		0.558	0.15207	0.537571	79.0308	199
18Jul2017 15:43:57'	0.50425	0.0140472	0.47825	205.955	469.25		0.471	0.225898	0.537571	82.6488	355.5
18Jul2017 15:53:57'	0.42525	0.070736	0.47825	215.452	590.25		0.422	0.255003	0.537571	88.0758	473
18Jul2017 16:03:58'	0.471	0.0776355	0.47825	192.93	522.5		0.492375	0.240231	0.537571	128.326	533.25
18Jul2017 16:08:47'	0.46025	0.083257	0.47825	195.101	493.75		0.498875	0.236938	0.537571	126.63	522.75
18Jul2017 16:13:57'	0.57475	0.0352321	0.47825	196.729	284.5		0.576875	0.144176	0.537571	121.599	362
18Jul2017 16:23:58'	0.652	0.105025	0.47825	193.473	149.5		0.63275	0.0807094	0.537571	116.002	239.25
18Jul2017 16:33:57'	0.6805	0.129806	0.47825	191.845	126.5		0.655	0.0559079	0.537571	113.628	221
18Jul2017 16:43:57'	0.68575	0.111651	0.47825	181.805	112.25		0.669625	0.0462361	0.537571	112.102	197.75
18Jul2017 16:53:57'	0.68675	0.093616	0.47825	173.664	110.5		0.67475	0.0476678	0.537571	110.293	189.25
18Jul2017 17:03:57'	0.694	0.0715115	0.47825	161.182	100.25		0.682625	0.0602393	0.537571	105.092	182.125
18Jul2017 17:13:58'	0.70425	0.0513197	0.47825	148.157	80.5		0.694375	0.0701438	0.537571	98.8168	157.375
18Jul2017 17:23:58'	0.72675	0.0667561	0.47825	145.172	67		0.707875	0.0690786	0.537571	93.729	129.125
18Jul2017 17:33:58'	0.73875	0.0762303	0.47825	144.087	54.5		0.7205	0.0655162	0.537571	90.6763	105.875
18Jul2017 17:43:58'	0.7445	0.0991986	0.47825	151.414	52		0.72975	0.049603	0.537571	90.6763	101.875
18Jul2017 17:53:57'	0.73375	0.115616	0.47825	163.082	89.25		0.71175	0.0685888	0.537571	94.0116	146.125
18Jul2017 18:03:57'	0.70575	0.129461	0.47825	180.991	167		0.675125	0.0992926	0.537571	100.852	232.75
18Jul2017 18:13:57'	0.68675	0.140678	0.47825	194.016	233.5		0.64125	0.127307	0.537571	107.975	308.5
18Jul2017 18:23:58'	0.67175	0.136332	0.47825	198.629	259.25		0.622375	0.143428	0.537571	111.649	334.875
18Jul2017 18:33:58'	0.67525	0.136071	0.47825	197	234.25		0.63375	0.122805	0.537571	111.762	302
18Jul2017 18:43:58'	0.69025	0.130166	0.47825	188.046	171		0.659625	0.0953167	0.537571	108.031	234.375
18Jul2017 18:53:58'	0.70425	0.128473	0.47825	181.262	113		0.686125	0.0691261	0.537571	103.622	168.625
18Jul2017 19:03:57'	0.71825	0.127434	0.47825	174.75	85		0.702625	0.0582638	0.537571	100.23	134.75
18Jul2017 19:13:57'	0.7295	0.12924	0.47825	170.679	66.75		0.716875	0.0476502	0.537571	97.5731	110.5
18Jul2017 19:23:57'	0.74025	0.130913	0.47825	166.881	53.5		0.727625	0.0410061	0.537571	95.3684	90.625
18Jul2017 19:33:57'	0.74925	0.132054	0.47825	163.624	40.75		0.737625	0.034939	0.537571	93.2202	75.375
18Jul2017 19:43:58'	0.757	0.130877	0.47825	159.825	31.25		0.746875	0.0298582	0.537571	90.7893	60.25
18Jul2017 19:53:58'	0.76525	0.123195	0.47825	153.042	24.25		0.754875	0.0269672	0.537571	87.2844	48.125
18Jul2017 20:03:58'	0.7725	0.114738	0.47825	146.258	18		0.762	0.0245555	0.537571	83.2707	36
18Jul2017 20:13:57'	0.7815	0.104124	0.47825	137.846	13		0.770375	0.0206732	0.537571	78.0133	25.375
18Jul2017 20:23:57'	0.7935	0.100917	0.47825	131.334	8		0.7825	0.0103757	0.537571	72.9254	15.625
18Jul2017 20:33:57'	0.80725	0.105713	0.47825	127.535	4		0.798	0.00340096	0.537571	68.5725	7.375
18Jul2017 20:43:57'	0.82075	0.108376	0.47825	122.922	1.5		0.814125	0.0157173	0.537571	64.1631	2.75
18Jul2017 20:53:58'	0.8325	0.110035	0.47825	118.58	0.25		0.827375	0.0240108	0.537571	60.6581	0.5
18Jul2017 21:03:58'	0.83925	0.103765	0.47825	113.153	0.25		0.83525	0.0236185	0.537571	57.2097	0.25
18Jul2017 21:13:58'	0.8425	0.0931482	0.47825	107.183	0.5		0.838875	0.0204341	0.537571	54.3832	0.5
18Jul2017 21:23:58'	0.84425	0.0846794	0.47825	102.842	0.5		0.840875	0.017652	0.537571	52.6307	0.375
18Jul2017 21:33:57'	0.84525	0.0763294	0.47825	98.7716	0.5		0.84275	0.01616	0.537571	51.6696	0.25
18Jul2017 21:43:57'	0.84625	0.0699273	0.47825	95.5154	0.25		0.843625	0.0176098	0.537571	51.8958	0.125
18Jul2017 21:53:57'	0.847	0.0502032	0.47825	92.2592	0.25		0.844125	0.0131702	0.537571	52.0088	0.125
18Jul2017 22:03:57'	0.8485	0.0312667	0.47825	87.9175	0.5		0.84475	0.00918533	0.537571	52.1219	0.125
18Jul2017 22:13:58'	0.8505	0.0149954	0.47825	83.3046	0.25		0.8445	0.0052965	0.537571	52.235	0.25
18Jul2017 22:23:58'	0.85125	0	0.47825	78.963	0.25		0.84475	0	0.537571	52.0654	0.375
18Jul2017 22:33:58'	0.85125	0	0.47825	75.9781	0.25		0.8445	0	0.537571	52.4046	0.375
18Jul2017 22:43:57'	0.852	0	0.47825	73.2646	0.25		0.84425	0	0.537571	52.8568	0.5
18Jul2017 22:53:57'	0.8515	0	0.47825	71.9079	0.5		0.844	0	0.537571	53.5352	0.5
18Jul2017 23:03:57'	0.85125	0	0.47825	71.0938	0.5		0.844	0	0.537571	53.9309	0.5
18Jul2017 23:13:57'	0.851	0	0.47825	70.0084	0.5		0.843875	0	0.537571	54.3266	0.5
18Jul2017 23:23:58'	0.84975	0	0.47825	69.1944	0.5		0.84325	0	0.537571	54.3832	0.5
18Jul2017 23:33:58'	0.85	0	0.47825	68.3803	0.5		0.843375	0	0.537571	54.4962	0.5
18Jul2017 23:43:58'	0.8505	0	0.47825	67.0236	0.75		0.84225	0	0.537571	54.7223	0.375
18Jul2017 23:53:57'	0.85125	0	0.47825	65.6668	1		0.8415	0	0.537571	54.7223	0.25
19Jul2017 00:03:57'	0.85125	0	0.47825	64.8528	1		0.841125	0	0.537571	54.7789	0.125
19Jul2017 00:13:57'	0.8505	0	0.47825	63.7674	0.75		0.84025	0	0.537571	54.5527	0
19Jul2017 00:23:57'	0.8505	0	0.47825	63.2247	0.75		0.8395	0	0.537571	55.005	0.125
19Jul2017 00:33:58'	0.85075	0	0.47825	62.682	0.75		0.83875	0	0.537571	56.2487	0.25
19Jul2017 00:43:58'	0.85125	0	0.47825	62.4106	0.75		0.837875	0	0.537571	57.8316	0.375
19Jul2017 00:53:58'	0.85075	0.00245672	0.471231	62.9571	1		0.83675	0.00295224	0.542904	59.5876	0.5
19Jul2017 01:03:58'	0.851	0.00393655	0.464213	63.2321	0.75		0.836375	0.00635035	0.548236	60.6653	0.5
19Jul2017 01:13:57'	0.8515	0.00524934	0.457194	63.5072	0.5		0.836	0.00974846	0.553569	60.895	0.5
19Jul2017 01:23:57'	0.8515	0.00765757	0.450175	63.5109	0.25		0.8355	0.00733912	0.48342	61.0116	0.375
19Jul2017 01:33:57'	0.853	0.00738462	0.450175	62.968	0.25		0.83525	0.00682797	0.48342	60.955	0.375
19Jul2017 01:43:58'	0.85225	0.00696603	0.450175	63.5109	0.5		0.83475	0.00667066	0.48342	61.1812	0.375
19Jul2017 01:53:58'	0.85225	0.00687744	0.450175	63.5109	0.75		0.8345	0.00673323	0.48342	61.4074	0.375
19Jul2017 02:03:58'	0.852	0.00571839	0.450175	64.0537	0.75		0.834	0.00717377	0.48342	61.7467	0.5
19Jul2017 02:13:58'	0.851	0.00604942	0.450175	64.3251	0.75		0.833375	0.00705706	0.48342	61.9163	0.375
19Jul2017 02:23:57'	0.852	0.00759391	0.450175	63.2395	0.5		0.833125	0.00464272	0.48342	61.3509	0.25
19Jul2017 02:33:57'	0.851	0.00799123	0.450175	63.5109	0.5		0.832875	0.00256346	0.48342	60.8985	0.125
19Jul2017 02:43:57'	0.851	0.00808163	0.450175	63.5109	0.75		0.83275	0.000368679	0.48342	60.3896	0
19Jul2017 02:53:57'	0.85125	0.00671789	0.450175	64.0537	0.5		0.832875	0.00128987	0.48342	60.0503	0.125
19Jul2017 03:03:58'	0.85075	0.0047162	0.450175	65.1393	0.5		0.8325	0.000322067	0.48342	60.5027	0.25
19Jul2017 03:13:58'	0.85	0.00363467	0.450175	65.9536	0.5		0.832	0.000136292	0.48342	60.7854	0.375
19Jul2017 03:23:58'	0.84975	0.00337059	0.450175	66.225	0.25		0.831625	0.000163644	0.48342	60.7854	0.5
19Jul2017 03:33:57'	0.8495	0.00301671	0.450175	66.4964	0.5		0.831125	0.000110575	0.48342	60.842	0.5
19Jul2017 03:43:57'	0.849	0.00239634	0.450175	67.0392	0.75		0.831125	0.000676954	0.48342	60.5592	0.375
19Jul2017 03:53:57'	0.8505	0.00210771	0.450175	66.4964	0.75		0.831	0.00183626	0.48342	60.22	0.375
19Jul2017 04:03:57'	0.8505	0.000742658	0.450175	67.0392	1		0.83075	0.00147568	0.48342	60.3896	0.375
19Jul2017 04:13:58'	0.8505	0.000613357	0.450175	67.5821	1		0.83025	0.000829683	0.48342	60.7854	0.375
19Jul2017 04:23:58'	0.84975	0.00125493	0.450175	68.1249	1		0.83	0.000356482	0.48342	61.0681	0.5
19Jul2017 04:33:58'	0.84925	0.00206514	0.450175	68.6677	0.75		0.829625	0.000795576	0.48342	61.5205	0.5
19Jul2017 04:43:58'	0.8495	0.00215363	0.450175	68.6677	0.75		0.82975	0.00070778	0.48342	61.5205	0.5
19Jul2017 04:53:57'	0.8495	0.00197282	0.450175	68.6677	0.75		0.83025	0.000522075	0.48342	61.2943	0.5
19Jul2017 05:03:57'	0.84875	0.00170557	0.450175	68.9391	0.75		0.829125	0.000611304	0.48342	61.6336	0.5
19Jul2017 05:13:57'	0.84725	0.00135185	0.450175	69.482	0.75		0.827875	0.000768431	0.48342	62.1425	0.5
19Jul2017 05:23:58'	0.84425	0.00157736	0.450175	70.839	0.75		0.8255	0.0017079	0.48342	63.2734	0.5
19Jul2017 05:33:58'	0.8385	0.00246943	0.450175	73.8246	0.25		0.820625	0.00218927	0.48342	65.4221	0.25
19Jul2017 05:43:58'	0.83025	0.000173241	0.450175	76.5387	0.5		0.81375	0.00134602	0.48342	66.9488	0.75
19Jul2017 05:53:58'	0.81825	0.00578797	0.450175	79.2529	1.75		0.803625	0.00659159	0.48342	69.0409	3.25
19Jul2017 06:03:57'	0.8045	0.0155224	0.450175	81.1528	4.5		0.79075	0.0149551	0.48342	71.0765	7.875
19Jul2017 06:13:57'	0.79025	0.0285495	0.450175	81.6956	8.25		0.771625	0.0279133	0.48342	73.9038	15.375
19Jul2017 06:23:57'	0.774	0.0417114	0.450175	83.0527	13.5		0.731375	0.0643046	0.48342	75.7132	25.625
19Jul2017 06:33:57'	0.7585	0.0542017	0.450175	84.4097	19.5		0.690125	0.106704	0.48342	75.8263	37.75
19Jul2017 06:43:58'	0.7435	0.066075	0.450175	85.7668	25.75		0.649375	0.1512	0.48342	75.0346	51.625
19Jul2017 06:53:58'	0.7315	0.0762356	0.450175	86.5811	32		0.6195	0.188645	0.48342	72.5467	65.25
19Jul2017 07:03:58'	0.7235	0.0841531	0.450175	86.5811	38.25		0.62	0.193259	0.48342	71.1331	77.875
19Jul2017 07:13:57'	0.71575	0.0902174	0.450175	87.3953	44.75		0.616	0.199607	0.48342	70.5111	100
19Jul2017 07:23:57'	0.7095	0.0941152	0.450175	88.4809	51.25		0.61475	0.201914	0.48342	70.2284	139
19Jul2017 07:33:57'	0.7025	0.095585	0.450175	90.9237	57.25		0.610625	0.205251	0.48342	70.5111	178.875
19Jul2017 07:43:57'	0.69575	0.0951301	0.450175	94.1806	63		0.60375	0.205921	0.48342	72.3771	218.125
19Jul2017 07:53:58'	0.69125	0.0905285	0.450175	98.2519	68.5		0.60825	0.19223	0.48342	75.0912	218.375
19Jul2017 08:03:58'	0.688	0.0781216	0.450175	105.309	79.75		0.6135	0.168475	0.48342	80.4629	228.5
19Jul2017 08:13:58'	0.68075	0.0595428	0.450175	116.979	106		0.617375	0.148435	0.48342	85.1561	235.75
19Jul2017 08:23:58'	0.6745	0.0223527	0.450175	136.521	136.75		0.617375	0.134605	0.48342	89.5101	243
19Jul2017 08:33:57'	0.6675	0.0147582	0.450175	156.334	166.5		0.619125	0.116648	0.48342	95.4472	278.25
19Jul2017 08:43:57'	0.66225	0.0523998	0.450175	175.605	191.75		0.62225	0.104689	0.48342	99.5184	290.75
19Jul2017 08:53:57'	0.66325	0.0865692	0.450175	190.533	198		0.62875	0.0866585	0.48342	104.438	304.75
19Jul2017 09:03:58'	0.664	0.101737	0.450175	197.047	201.25		0.633125	0.0704453	0.48342	109.357	320.625
19Jul2017 09:13:58'	0.65025	0.109085	0.450175	206.546	231.5		0.632375	0.0638011	0.48342	112.298	339.75
19Jul2017 09:23:58'	0.59575	0.0743163	0.450175	215.503	284.75		0.623125	0.0659041	0.48342	115.068	362.75
19Jul2017 09:33:58'	0.536	0.0302467	0.450175	222.559	346.5		0.599375	0.0816687	0.48342	117.952	391.625
19Jul2017 09:43:57'	0.47225	0.0197503	0.450175	228.802	420.25		0.57175	0.101604	0.48342	121.062	427.125
19Jul2017 09:53:57'	0.419	0.0676317	0.450175	231.245	472.75		0.54525	0.119645	0.48342	124.342	456.875
19Jul2017 10:03:57'	0.39225	0.105742	0.450175	226.088	509.75		0.52125	0.13651	0.48342	127.056	479.125
19Jul2017 10:13:57'	0.35825	0.1518	0.450175	220.66	550.5		0.507375	0.146317	0.48342	128.752	496.5
19Jul2017 10:23:58'	0.34075	0.175246	0.450175	217.945	583.5		0.491125	0.160419	0.48342	129.487	507.25
19Jul2017 10:33:58'	0.329	0.190112	0.450175	216.588	607		0.47175	0.177558	0.48342	130.166	523.75
19Jul2017 10:43:58'	0.36	0.151384	0.450175	220.117	516.25		0.448625	0.198788	0.48342	130.957	541.25
19Jul2017 10:53:57'	0.42825	0.0850886	0.450175	219.302	414		0.42975	0.219556	0.48342	129.939	563.125
19Jul2017 11:03:57'	0.483	0.0345302	0.450175	217.403	445		0.42025	0.235585	0.48342	127.169	587.5
19Jul2017 11:13:57'	0.4755	0.0594824	0.450175	209.532	499.75		0.408875	0.255276	0.48342	123.776	614.25
19Jul2017 11:23:57'	0.42975	0.114188	0.450175	205.46	671.25		0.4	0.271437	0.48342	120.666	642.625
19Jul2017 11:33:58'	0.35975	0.182804	0.450175	206.003	854.75		0.3815	0.29415	0.48342	119.196	670.125
19Jul2017 11:43:58'	0.286	0.26497	0.450175	202.203	903		0.36625	0.313769	0.48342	117.387	696
19Jul2017 11:53:58'	0.2615	0.290043	0.450175	201.932	942.5		0.352625	0.33048	0.48342	115.973	723.25
19Jul2017 12:03:58'	0.24875	0.309425	0.450175	198.946	980.25		0.33925	0.348913	0.48342	113.655	751.5
19Jul2017 12:13:57'	0.2305	0.343358	0.450175	191.89	1017.5		0.332625	0.365087	0.48342	109.47	779.875
19Jul2017 12:23:57'	0.215	0.370358	0.450175	186.733	1057.5		0.313125	0.391478	0.48342	106.36	809.125
19Jul2017 12:33:57'	0.21575	0.375685	0.450175	184.019	1096.5		0.29825	0.414247	0.48342	103.024	836
19Jul2017 12:43:58'	0.204	0.399484	0.450175	178.59	1141.25		0.28575	0.433685	0.48342	100.31	865
19Jul2017 12:53:58'	0.20575	0.391108	0.450175	181.576	1184		0.275625	0.445558	0.48342	99.4619	889.875
19Jul2017 13:03:58'	0.197	0.404622	0.450175	179.405	1233.5		0.26975	0.457185	0.48342	97.1436	921.25
19Jul2017 13:13:58'	0.246	0.335619	0.450175	188.361	1045.25		0.309125	0.404501	0.48342	102.685	792.5
19Jul2017 13:23:57'	0.32675	0.228975	0.450175	200.032	802.5		0.3675	0.33037	0.48342	109.244	632.875
19Jul2017 13:33:57'	0.333	0.199774	0.450175	210.346	722		0.3785	0.29655	0.48342	118.065	583.375
19Jul2017 13:43:57'	0.42175	0.0796713	0.450175	224.459	462.25		0.4455	0.207236	0.48342	127.621	414.5
19Jul2017 13:53:57'	0.3635	0.166923	0.450175	211.431	782.25		0.3935	0.276371	0.48342	121.232	605.375
19Jul2017 14:03:58'	0.29325	0.262467	0.450175	200.032	1157.25		0.3275	0.361944	0.48342	113.372	816.75
19Jul2017 14:13:58'	0.27725	0.318291	0.450175	182.119	1382		0.303625	0.416043	0.48342	102.459	920.75
19Jul2017 14:23:58'	0.195	0.428947	0.450175	169.362	1721.25		0.23175	0.51165	0.48342	92.9593	1129
19Jul2017 14:33:57'	0.19775	0.427938	0.450175	168.548	1652		0.227125	0.523082	0.48342	90.1886	1125.88
19Jul2017 14:43:57'	0.18625	0.448478	0.450175	164.477	1535.75		0.220125	0.537052	0.48342	87.8137	1123.12
19Jul2017 14:53:57'	0.194	0.434149	0.450175	167.462	1384.5		0.217	0.545733	0.48342	85.4388	1109.12
19Jul2017 15:03:57'	0.19975	0.423566	0.450175	169.634	1263		0.219375	0.544663	0.48342	84.9299	1089.25
19Jul2017 15:13:58'	0.2065	0.404794	0.450175	175.062	1185.25		0.22775	0.534403	0.48342	85.7781	1070
19Jul2017 15:23:58'	0.22475	0.373247	0.450175	181.033	1112.75		0.235875	0.522985	0.48342	86.8525	1031.88
19Jul2017 15:33:58'	0.306	0.270863	0.450175	190.533	862.25		0.304625	0.427924	0.48342	96.7478	824.125
19Jul2017 15:43:58'	0.314	0.259258	0.450175	192.161	809.75		0.308375	0.413544	0.48342	101.441	794.875
19Jul2017 15:53:57'	0.34375	0.226506	0.450175	193.518	761.75		0.31975	0.401342	0.48342	101.893	762.5
19Jul2017 16:03:57'	0.41875	0.143569	0.450175	197.047	559		0.38775	0.319055	0.48342	107.265	583.875
19Jul2017 16:13:57'	0.393	0.171169	0.450175	196.232	682.75		0.3525	0.368533	0.48342	102.515	712.875
19Jul2017 16:23:57'	0.43	0.111349	0.450175	206.546	642.5		0.388625	0.324582	0.48342	104.212	655.75
19Jul2017 16:33:58'	0.443	0.0960378	0.450175	207.632	619.25		0.420625	0.275548	0.48342	109.866	599.75
19Jul2017 16:43:58'	0.4045	0.1232	0.450175	212.789	754.25		0.402	0.288285	0.48342	111.336	698.5
19Jul2017 16:53:58'	0.428	0.0989777	0.450175	213.06	628.25		0.43225	0.241929	0.48342	115.86	662.5
19Jul2017 17:03:57'	0.46525	0.0779288	0.450175	205.732	512.75		0.452625	0.217222	0.48342	117.047	630.5
19Jul2017 17:13:57'	0.5205	0.0202657	0.450175	206.817	351		0.47325	0.189139	0.48342	119.309	598.375
19Jul2017 17:23:57'	0.58125	0.03026	0.450175	202.203	211.5		0.494625	0.161901	0.48342	120.779	571.125
19Jul2017 17:33:57'	0.6115	0.0560695	0.450175	200.303	213.75		0.525	0.13204	0.48342	119.988	482.125
19Jul2017 17:43:58'	0.6315	0.0839127	0.450175	203.832	248.25		0.54975	0.106838	0.48342	119.874	445.75
19Jul2017 17:53:58'	0.6395	0.0961483	0.450175	205.732	312.5		0.57425	0.0837248	0.48342	118.913	388.75
19Jul2017 18:03:58'	0.64325	0.0998259	0.450175	205.732	356.5		0.597625	0.0654769	0.48342	117.217	322.25
19Jul2017 18:13:58'	0.64825	0.104826	0.450175	205.732	365		0.61325	0.0544228	0.48342	116.086	302.875
19Jul2017 18:23:57'	0.661	0.112177	0.450175	203.289	316		0.629	0.0403694	0.48342	115.86	241.875
19Jul2017 18:33:57'	0.6745	0.11721	0.450175	199.489	236.75		0.6455	0.0307087	0.48342	114.05	196.375
19Jul2017 18:43:57'	0.689	0.124563	0.450175	196.232	172.25		0.662375	0.0201445	0.48342	112.298	163.875
19Jul2017 18:53:58'	0.69825	0.129272	0.450175	194.061	127.75		0.674125	0.0129867	0.48342	110.884	145.25
19Jul2017 19:03:58'	0.70925	0.131812	0.450175	190.261	81		0.689	0.00688711	0.48342	107.831	124.5
19Jul2017 19:13:58'	0.717	0.135872	0.450175	188.633	69		0.7005	0.000547911	0.48342	106.078	110.5
19Jul2017 19:23:58'	0.7235	0.138586	0.450175	187.004	59		0.71075	0.00394466	0.48342	104.042	94.5
19Jul2017 19:33:57'	0.73325	0.140239	0.450175	183.476	48.5		0.72175	0.00891558	0.48342	102.006	77.875
19Jul2017 19:43:57'	0.74275	0.140188	0.450175	179.133	39		0.732375	0.0133385	0.48342	99.9143	61.25
19Jul2017 19:53:57'	0.753	0.138391	0.450175	173.705	29.75		0.74425	0.0176334	0.48342	97.2567	46.5
19Jul2017 20:03:57'	0.7625	0.134735	0.450175	167.734	21.25		0.754125	0.0198396	0.48342	94.5991	33
19Jul2017 20:13:58'	0.7725	0.130218	0.450175	161.22	13.75		0.764625	0.0218772	0.48342	91.6022	21.375
19Jul2017 20:23:58'	0.78575	0.129667	0.450175	154.977	7.75		0.778	0.0262171	0.48342	88.4357	12.375
19Jul2017 20:33:58'	0.79925	0.130465	0.450175	149.278	4		0.791625	0.0306055	0.48342	85.1561	6.125
19Jul2017 20:43:57'	0.81225	0.130309	0.450175	143.307	1.5		0.80375	0.0331121	0.48342	81.7069	2.5
19Jul2017 20:53:57'	0.82325	0.128296	0.450175	137.335	0.5		0.814375	0.0326047	0.48342	77.6357	0.75
19Jul2017 21:03:57'	0.829	0.113409	0.450175	128.107	0.25		0.821	0.0229838	0.48342	71.3593	0.125
19Jul2017 21:13:57'	0.832	0.103497	0.450175	122.136	0		0.82475	0.0137831	0.48342	66.2137	0.125
19Jul2017 21:23:58'	0.8335	0.0953334	0.450175	117.794	0		0.828	0.00622003	0.48342	61.8032	0.125
19Jul2017 21:33:58'	0.8345	0.0853539	0.450175	112.908	0		0.829625	0.000902838	0.48342	58.8064	0.125
19Jul2017 21:43:58'	0.8345	0.0811774	0.450175	111.008	0.25		0.830875	0.000630927	0.48342	58.1278	0.125
19Jul2017 21:53:58'	0.8345	0.0568485	0.450175	106.666	0.25		0.830875	0.000128108	0.48342	57.6755	0
19Jul2017 22:03:57'	0.8345	0.0335612	0.450175	102.594	0.5		0.83075	0.000497391	0.48342	57.6755	0.125
19Jul2017 22:13:57'	0.83525	0.0148348	0.450175	100.695	0.5		0.831125	0.000473506	0.48342	57.6755	0.25
19Jul2017 22:23:57'	0.83425	0	0.450175	99.6089	0.25		0.8305	0	0.48342	57.7886	0.25
19Jul2017 22:33:58'	0.83475	0	0.450175	97.1662	0.25		0.83075	0	0.48342	58.0147	0.375
19Jul2017 22:43:58'	0.8345	0	0.450175	94.1806	0		0.830625	0	0.48342	58.2409	0.375
19Jul2017 22:53:58'	0.83475	0	0.450175	88.4809	0		0.829875	0	0.48342	58.5236	0.375
19Jul2017 23:03:58'	0.836	0	0.450175	84.1383	0		0.828375	0	0.48342	59.7111	0.375
19Jul2017 23:13:57'	0.836	0	0.450175	81.1528	0		0.827875	0	0.48342	60.22	0.375
19Jul2017 23:23:57'	0.836	0	0.450175	78.4386	0		0.827375	0	0.48342	60.3896	0.375
19Jul2017 23:33:57'	0.836	0	0.450175	77.6244	0		0.82675	0	0.48342	61.1812	0.375
19Jul2017 23:43:57'	0.836	0	0.450175	77.0816	0		0.827125	0	0.48342	61.4074	0.5
19Jul2017 23:53:58'	0.8365	0	0.450175	76.2673	0		0.8265	0	0.48342	61.8032	0.5
20Jul2017 00:03:58'	0.837	0	0.450175	75.7245	0		0.826	0	0.48342	62.2556	0.375
20Jul2017 00:13:58'	0.8365	0	0.450175	75.7245	0		0.825375	0	0.48342	62.4818	0.375
20Jul2017 00:23:57'	0.83625	0	0.450175	75.1817	0.25		0.824625	0	0.48342	62.6514	0.375
20Jul2017 00:33:57'	0.83575	0	0.450175	74.096	0.5		0.824375	0	0.48342	62.5948	0.375
20Jul2017 00:43:57'	0.835	0	0.450175	72.7389	0.75		0.82375	0	0.48342	62.4252	0.5
20Jul2017 00:53:57'	0.83475	0.00229698	0.457796	70.5715	1		0.82375	0.00214829	0.483076	61.6936	0.5
20Jul2017 01:03:58'	0.83475	0.00459397	0.465418	68.4041	0.75		0.823625	0.00325382	0.482732	61.4711	0.5
20Jul2017 01:13:58'	0.83425	0.00595162	0.473039	67.5938	0.75		0.823125	0.00305252	0.482388	61.8707	0.5
20Jul2017 01:23:58'	0.83475	0.00624832	0.48066	67.5979	0.75		0.82275	0.00193787	0.482044	62.8923	0.5
20Jul2017 01:33:58'	0.83475	0.00445858	0.48066	68.4123	0.75		0.822	0.000923748	0.482044	64.1366	0.5
20Jul2017 01:43:57'	0.83575	0.00337564	0.48066	68.4123	1		0.82125	0.00280407	0.482044	64.9284	0.5
20Jul2017 01:53:57'	0.8365	0.00376711	0.48066	67.8694	1		0.82025	0.00324616	0.482044	65.3808	0.5
20Jul2017 02:03:57'	0.83625	0.00482807	0.48066	67.5979	0.75		0.819625	0.00290074	0.482044	65.4374	0.375
20Jul2017 02:13:58'	0.8375	0.00542523	0.48066	66.7835	0.5		0.819625	0.00285841	0.482044	65.3808	0.375
20Jul2017 02:23:58'	0.83725	0.00512268	0.48066	67.0549	0.5		0.819	0.00267274	0.482044	65.4939	0.25
20Jul2017 02:33:58'	0.836	0.00378283	0.48066	68.1408	0.25		0.8185	0.00238941	0.482044	65.5505	0.25
20Jul2017 02:43:58'	0.83625	0.00272187	0.48066	68.4123	0.25		0.818	0.00172908	0.482044	65.4939	0.375
20Jul2017 02:53:57'	0.83375	0.00203161	0.48066	69.7697	0.25		0.81675	0.0009601	0.482044	65.6636	0.375
20Jul2017 03:03:57'	0.8325	0.00195319	0.48066	70.3127	0		0.81625	7.29438e-05	0.482044	65.4939	0.375
20Jul2017 03:13:57'	0.83225	0.00238695	0.48066	70.3127	0.25		0.81625	0.000811414	0.482044	65.098	0.375
20Jul2017 03:23:57'	0.832	0.00461299	0.48066	69.4982	0.25		0.816	0.00232085	0.482044	64.6456	0.375
20Jul2017 03:33:58'	0.83275	0.0050319	0.48066	68.9553	0.5		0.816125	0.00289114	0.482044	64.3628	0.375
20Jul2017 03:43:58'	0.8325	0.00396497	0.48066	69.4982	0.75		0.81625	0.00272856	0.482044	64.3628	0.5
20Jul2017 03:53:58'	0.833	0.00267633	0.48066	69.7697	0.75		0.815875	0.00239376	0.482044	64.6456	0.5
20Jul2017 04:03:57'	0.834	7.19258e-05	0.48066	70.5841	1		0.8155	0.000904543	0.482044	65.3243	0.5
20Jul2017 04:13:57'	0.83375	0.00156763	0.48066	71.3986	0.75		0.814875	0.000164984	0.482044	65.8898	0.5
20Jul2017 04:23:57'	0.83425	0.00198852	0.48066	71.3986	0.75		0.814	0.000176697	0.482044	66.3989	0.5
20Jul2017 04:33:57'	0.83525	0.00156183	0.48066	70.8556	0.75		0.813625	0.00069897	0.482044	66.7948	0.5
20Jul2017 04:43:58'	0.835	0.00145922	0.48066	70.8556	0.75		0.81325	0.000608848	0.482044	66.9079	0.5
20Jul2017 04:53:58'	0.8365	0.0010221	0.48066	70.0412	1		0.813	0.00108764	0.482044	67.1341	0.375
20Jul2017 05:03:58'	0.83625	0.000812935	0.48066	70.0412	0.75		0.8125	0.00167932	0.482044	67.53	0.375
20Jul2017 05:13:58'	0.8345	0.00113915	0.48066	70.8556	0.75		0.8115	0.00218835	0.482044	68.039	0.375
20Jul2017 05:23:57'	0.83175	0.00225766	0.48066	72.4845	0.5		0.8095	0.00380838	0.482044	69.3399	0.375
20Jul2017 05:33:57'	0.82675	0.00449188	0.48066	75.4707	0.25		0.806375	0.00660654	0.482044	71.4891	0.25
20Jul2017 05:43:57'	0.82075	0.00479965	0.48066	78.1855	0.25		0.801	0.00842901	0.482044	74.0907	0.75
20Jul2017 05:53:58'	0.81225	0.000573318	0.48066	80.0859	1.75		0.79275	0.00617146	0.482044	76.2965	2.875
20Jul2017 06:03:58'	0.79925	0.00929385	0.48066	81.4432	4.75		0.7805	0.00087953	0.482044	78.2194	7.375
20Jul2017 06:13:58'	0.78175	0.025713	0.48066	81.9862	9.5		0.760375	0.0111335	0.482044	82.4613	14.625
20Jul2017 06:23:58'	0.761	0.0439172	0.48066	83.0721	15.75		0.72875	0.0431378	0.482044	82.8006	24.25
20Jul2017 06:33:57'	0.74175	0.0611599	0.48066	83.8865	23.25		0.699125	0.0732495	0.482044	83.2531	36.5
20Jul2017 06:43:57'	0.72525	0.0770933	0.48066	84.158	31		0.673125	0.101166	0.482044	83.3662	49.875
20Jul2017 06:53:57'	0.71325	0.0883659	0.48066	84.4295	39		0.651375	0.132635	0.482044	80.0293	64.375
20Jul2017 07:03:57'	0.7045	0.0965097	0.48066	84.701	46.5		0.63875	0.146782	0.482044	79.8596	91.25
20Jul2017 07:13:58'	0.6965	0.100713	0.48066	86.3298	53.75		0.623375	0.161317	0.482044	80.3121	104.75
20Jul2017 07:23:58'	0.6875	0.10395	0.48066	88.7731	60.25		0.6075	0.175858	0.482044	80.708	116.625
20Jul2017 07:33:58'	0.68075	0.106221	0.48066	90.6735	65.75		0.5985	0.182513	0.482044	81.4432	126
20Jul2017 07:43:57'	0.6755	0.105644	0.48066	93.1168	71.5		0.59	0.179673	0.482044	84.8367	148
20Jul2017 07:53:57'	0.67275	0.0974381	0.48066	97.7319	76.5		0.585625	0.169959	0.482044	89.0785	191.25
20Jul2017 08:03:57'	0.6715	0.0738526	0.48066	108.32	82		0.5865	0.152154	0.482044	94.6778	238.625
20Jul2017 08:13:57'	0.672	0.0311742	0.48066	126.237	94.75		0.594875	0.121899	0.482044	102.483	260.75
20Jul2017 08:23:58'	0.67	0.0122142	0.48066	145.512	123.75		0.61075	0.0907746	0.482044	108.365	275.25
20Jul2017 08:33:58'	0.66025	0.0548546	0.48066	167.773	156.75		0.62625	0.064454	0.482044	112.776	278.875
20Jul2017 08:43:58'	0.6485	0.0848102	0.48066	185.419	188.75		0.63625	0.0444538	0.482044	116.679	289.375
20Jul2017 08:53:57'	0.63825	0.0974668	0.48066	195.192	213		0.635125	0.0394792	0.482044	118.771	330.25
20Jul2017 09:03:57'	0.63675	0.109865	0.48066	201.165	219.25		0.625125	0.0408576	0.482044	121.599	346.125
20Jul2017 09:13:57'	0.6395	0.113808	0.48066	201.708	228.75		0.61375	0.0424742	0.482044	124.484	356.75
20Jul2017 09:23:57'	0.6325	0.1118	0.48066	203.88	245.5		0.60125	0.0457742	0.482044	126.916	360.75
20Jul2017 09:33:58'	0.60575	0.100924	0.48066	210.667	271		0.586125	0.0520603	0.482044	129.235	374.375
20Jul2017 09:43:58'	0.5715	0.0818732	0.48066	217.182	274.5		0.5575	0.0723115	0.482044	131.893	405.625
20Jul2017 09:53:58'	0.5645	0.071124	0.48066	215.553	257.75		0.52375	0.0966999	0.482044	135.343	448.625
20Jul2017 10:03:58'	0.5635	0.0695166	0.48066	215.282	252		0.4925	0.120136	0.482044	138.34	486.375
20Jul2017 10:13:57'	0.58675	0.0792756	0.48066	209.581	224		0.45775	0.147565	0.482044	141.055	504.25
20Jul2017 10:23:57'	0.60825	0.0938145	0.48066	206.594	220.5		0.43875	0.167603	0.482044	140.094	520.5
20Jul2017 10:33:57'	0.601	0.0986352	0.48066	211.752	232.75		0.4155	0.198105	0.482044	136.7	538.125
20Jul2017 10:43:57'	0.60225	0.102262	0.48066	212.838	230.25		0.398625	0.21702	0.482044	135.343	556.5
20Jul2017 10:53:58'	0.593	0.0982114	0.48066	215.01	244.25		0.38775	0.236763	0.482044	131.384	585.25
20Jul2017 11:03:58'	0.577	0.0872367	0.48066	217.182	345		0.37275	0.256455	0.482044	129.178	611.375
20Jul2017 11:13:58'	0.51225	0.000578886	0.48066	207.409	462.75		0.36625	0.261965	0.482044	129.235	626.5
20Jul2017 11:23:57'	0.43175	0.109045	0.48066	195.464	581.25		0.355125	0.281765	0.482044	125.728	638.625
20Jul2017 11:33:57'	0.35925	0.211472	0.48066	182.704	703		0.340875	0.299479	0.482044	124.031	646.25
20Jul2017 11:43:57'	0.2855	0.319518	0.48066	168.045	755		0.335	0.309576	0.482044	122.052	658.25
20Jul2017 11:53:57'	0.26775	0.346154	0.48066	164.244	779.75		0.326875	0.325765	0.482044	118.828	666.25
20Jul2017 12:03:58'	0.264	0.354976	0.48066	162.072	812.75		0.31675	0.339025	0.482044	117.075	686.75
20Jul2017 12:13:58'	0.25375	0.361988	0.48066	163.429	837.5		0.309375	0.34782	0.482044	116.283	703.5
20Jul2017 12:23:58'	0.254	0.354178	0.48066	166.687	852.75		0.305375	0.353724	0.482044	115.604	715.5
20Jul2017 12:33:58'	0.2395	0.372501	0.48066	165.058	890.25		0.29975	0.367264	0.482044	112.72	746.625
20Jul2017 12:43:57'	0.2185	0.398685	0.48066	162.886	924.75		0.28575	0.394402	0.482044	108.534	771.375
20Jul2017 12:53:57'	0.20725	0.415037	0.48066	160.715	965		0.270375	0.417912	0.482044	105.537	803.125
20Jul2017 13:03:57'	0.18325	0.456203	0.48066	153.385	1005.25		0.2465	0.458045	0.482044	100.107	833.25
20Jul2017 13:13:58'	0.17875	0.46335	0.48066	152.299	1033		0.234375	0.477326	0.482044	97.7884	856.375
20Jul2017 13:23:58'	0.1855	0.455934	0.48066	152.57	1049.75		0.23275	0.475824	0.482044	98.2975	870.25
20Jul2017 13:33:58'	0.172	0.476467	0.48066	149.584	1083.5		0.229625	0.484079	0.482044	96.4876	888.875
20Jul2017 13:43:58'	0.1705	0.474085	0.48066	151.213	1098.5		0.22725	0.483471	0.482044	96.9966	898.625
20Jul2017 13:53:57'	0.1665	0.477431	0.48066	151.484	1129.5		0.21625	0.492659	0.482044	97.0532	922
20Jul2017 14:03:57'	0.16425	0.482804	0.48066	150.127	1098.25		0.21175	0.501187	0.482044	95.5261	927.875
20Jul2017 14:13:57'	0.17075	0.476389	0.48066	150.127	1062.5		0.217125	0.497174	0.482044	94.7909	902.75
20Jul2017 14:23:57'	0.24275	0.366696	0.48066	166.144	879.75		0.26575	0.443397	0.482044	96.827	775.75
20Jul2017 14:33:58'	0.24375	0.365064	0.48066	166.416	854.25		0.280625	0.430989	0.482044	96.2614	738.75
20Jul2017 14:43:58'	0.30825	0.258483	0.48066	184.333	721		0.327625	0.380019	0.482044	98.1278	609
20Jul2017 14:53:58'	0.32	0.232017	0.48066	190.577	744.5		0.3405	0.365283	0.482044	98.7499	624.125
20Jul2017 15:03:57'	0.30275	0.262132	0.48066	185.148	773.5		0.32825	0.382055	0.482044	96.7138	680.875
20Jul2017 15:13:57'	0.34075	0.197357	0.48066	196.55	669		0.355125	0.348169	0.482044	98.863	633.75
20Jul2017 15:23:57'	0.327	0.197101	0.48066	202.522	715.75		0.35575	0.340713	0.482044	101.465	693.875
20Jul2017 15:33:57'	0.3865	0.108312	0.48066	215.01	543.75		0.39525	0.290454	0.482044	106.498	594.125
20Jul2017 15:43:58'	0.37775	0.110742	0.48066	217.725	588.5		0.4065	0.271215	0.482044	109.892	614.125
20Jul2017 15:53:58'	0.37925	0.118805	0.48066	213.653	578.25		0.420125	0.253578	0.482044	111.928	618.25
20Jul2017 16:03:58'	0.364	0.15507	0.48066	204.694	607		0.423	0.250831	0.482044	111.984	635.25
20Jul2017 16:13:58'	0.34875	0.168247	0.48066	205.508	651		0.4345	0.238439	0.482044	112.437	645.875
20Jul2017 16:23:57'	0.35925	0.151284	0.48066	208.223	647.5		0.460875	0.212165	0.482044	112.946	616.125
20Jul2017 16:33:57'	0.38575	0.0959363	0.48066	220.44	619.75		0.479	0.191402	0.482044	114.303	588.5
20Jul2017 16:43:57'	0.40575	0.0631472	0.48066	225.869	578.5		0.49975	0.167594	0.482044	115.944	564.875
20Jul2017 16:53:58'	0.4165	0.0493294	0.48066	227.227	501		0.503125	0.165307	0.482044	115.887	584.375
20Jul2017 17:03:58'	0.46275	0.00123799	0.48066	228.041	451.5		0.510875	0.154137	0.482044	117.584	567.75
20Jul2017 17:13:58'	0.48125	0.0114124	0.48066	225.598	421		0.530875	0.131346	0.482044	119.111	539.375
20Jul2017 17:23:58'	0.5085	0.0329492	0.48066	223.154	393.75		0.551375	0.112313	0.482044	118.998	486.125
20Jul2017 17:33:57'	0.536	0.054181	0.48066	220.44	433.25		0.577625	0.0877212	0.482044	118.602	421.5
20Jul2017 17:43:57'	0.55275	0.0619785	0.48066	216.639	365		0.59875	0.0663697	0.482044	118.885	368.125
20Jul2017 17:53:57'	0.5855	0.0851061	0.48066	212.567	307		0.615875	0.0531154	0.482044	117.584	327.375
20Jul2017 18:03:57'	0.6275	0.10985	0.48066	205.237	228.75		0.63475	0.0396039	0.482044	115.661	277.625
20Jul2017 18:13:58'	0.6565	0.12663	0.48066	200.079	181.5		0.6475	0.0292106	0.482044	114.812	245.125
20Jul2017 18:23:58'	0.667	0.134819	0.48066	198.993	198.5		0.657375	0.0215377	0.482044	114.19	224.25
20Jul2017 18:33:58'	0.67675	0.142571	0.48066	198.179	214.5		0.665875	0.0132037	0.482044	114.303	206.875
20Jul2017 18:43:57'	0.67925	0.144935	0.48066	198.179	209.75		0.6695	0.00945647	0.482044	114.53	204.75
20Jul2017 18:53:57'	0.689	0.144448	0.48066	193.835	170.25		0.676625	0.00548395	0.482044	113.512	195.375
20Jul2017 19:03:57'	0.7035	0.146083	0.48066	188.405	122.5		0.690375	0.000554216	0.482044	110.74	168.375
20Jul2017 19:13:57'	0.71625	0.146417	0.48066	182.976	81		0.704875	0.00721941	0.482044	108.025	139.125
20Jul2017 19:23:58'	0.726	0.147895	0.48066	179.447	69.75		0.716125	0.0134051	0.482044	106.216	117.375
20Jul2017 19:33:58'	0.736	0.147654	0.48066	175.103	58.75		0.72675	0.0186752	0.482044	104.406	91.625
20Jul2017 19:43:58'	0.7455	0.147431	0.48066	171.031	48.75		0.736125	0.022611	0.482044	102.596	73.375
20Jul2017 19:53:58'	0.75375	0.144573	0.48066	166.416	37.75		0.744375	0.0236254	0.482044	100.051	57.125
20Jul2017 20:03:57'	0.76475	0.14017	0.48066	159.9	25.25		0.756625	0.0264949	0.482044	96.827	37.625
20Jul2017 20:13:57'	0.77875	0.142556	0.48066	155.014	14.75		0.771125	0.0324185	0.482044	93.8294	21.25
20Jul2017 20:23:57'	0.79275	0.145362	0.48066	150.127	7.5		0.785625	0.0392622	0.482044	91.1146	10.625
20Jul2017 20:33:57'	0.8075	0.1486	0.48066	145.24	2.75		0.799	0.0448343	0.482044	88.3999	3.75
20Jul2017 20:43:58'	0.81975	0.151442	0.48066	141.168	1		0.81025	0.0487756	0.482044	85.8548	1.625
20Jul2017 20:53:58'	0.82575	0.148187	0.48066	137.096	0.25		0.816	0.0466024	0.482044	83.0269	0.625
20Jul2017 21:03:58'	0.8295	0.143623	0.48066	133.567	0.25		0.81975	0.0429526	0.482044	80.4818	0.125
20Jul2017 21:13:57'	0.83225	0.139025	0.48066	130.309	0.25		0.821375	0.040276	0.482044	78.9547	0
20Jul2017 21:23:57'	0.8335	0.13565	0.48066	128.409	0.25		0.821875	0.0375241	0.482044	77.767	0.125
20Jul2017 21:33:57'	0.83425	0.132274	0.48066	126.78	0.5		0.822125	0.0348737	0.482044	76.6924	0.25
20Jul2017 21:43:57'	0.835	0.131033	0.48066	125.966	0.25		0.82175	0.0338785	0.482044	76.4662	0.25
20Jul2017 21:53:58'	0.83425	0.0974304	0.48066	126.509	0.25		0.82125	0.0244774	0.482044	76.2399	0.25
20Jul2017 22:03:58'	0.834	0.0645543	0.48066	126.509	0.25		0.820875	0.015918	0.482044	76.353	0.25
20Jul2017 22:13:58'	0.834	0.032866	0.48066	126.509	0.25		0.82075	0.00843432	0.482044	76.6358	0.125
20Jul2017 22:23:57'	0.8335	0	0.48066	126.78	0.25		0.819875	0	0.482044	76.9752	0.125
20Jul2017 22:33:57'	0.8325	0	0.48066	127.323	0.25		0.819	0	0.482044	77.4842	0.125
20Jul2017 22:43:57'	0.8315	0	0.48066	127.866	0.25		0.81825	0	0.482044	77.767	0.125
20Jul2017 22:53:57'	0.83075	0	0.48066	128.409	0		0.817125	0	0.482044	78.1629	0.125
20Jul2017 23:03:58'	0.82975	0	0.48066	128.952	0		0.81625	0	0.482044	78.2194	0.125
20Jul2017 23:13:58'	0.83	0	0.48066	127.866	0		0.816	0	0.482044	77.8235	0.125
20Jul2017 23:23:58'	0.82975	0	0.48066	127.866	0		0.81525	0	0.482044	77.8801	0
20Jul2017 23:33:58'	0.8295	0	0.48066	128.137	0		0.8145	0	0.482044	78.1629	0
20Jul2017 23:43:57'	0.82925	0	0.48066	128.137	0		0.8145	0	0.482044	78.276	0
20Jul2017 23:53:57'	0.829	0	0.48066	128.68	0		0.813875	0	0.482044	78.785	0
21Jul2017 00:03:57'	0.8285	0	0.48066	128.952	0.25		0.813875	0	0.482044	78.8981	0.125
21Jul2017 00:13:58'	0.82825	0	0.48066	128.952	0.25		0.813625	0	0.482044	79.0113	0.125
21Jul2017 00:23:58'	0.8285	0	0.48066	128.409	0.5		0.81325	0	0.482044	79.0113	0.25
21Jul2017 00:33:58'	0.828	0	0.48066	128.409	0.5		0.81325	0	0.482044	78.6719	0.25
21Jul2017 00:43:58'	0.8275	0	0.48066	127.866	0.25		0.8125	0	0.482044	78.3326	0.125
21Jul2017 00:53:57'	0.82675	0.0238489	0.467526	127.33	0.5		0.81275	0.00845362	0.489098	77.2623	0.125
21Jul2017 01:03:57'	0.826	0.0474962	0.454392	127.066	0.25		0.813	0.0164514	0.496152	76.1355	0
21Jul2017 01:13:57'	0.8265	0.0699747	0.441258	125.445	0.25		0.813625	0.0229338	0.503206	74.4995	0
21Jul2017 01:23:57'	0.82725	0.0910345	0.428124	123.551	0.5		0.814625	0.026817	0.51026	72.0715	0
21Jul2017 01:33:58'	0.82725	0.0876065	0.428124	121.922	0.25		0.815625	0.0216685	0.51026	69.8652	0.125
21Jul2017 01:43:58'	0.82825	0.0817437	0.428124	118.663	0.5		0.816375	0.0154489	0.51026	67.3195	0.125
21Jul2017 01:53:58'	0.8285	0.074479	0.428124	115.133	0.5		0.81725	0.00970705	0.51026	64.9436	0.25
21Jul2017 02:03:57'	0.8285	0.0699211	0.428124	112.961	0.5		0.81825	0.00603018	0.51026	63.2464	0.375
21Jul2017 02:13:57'	0.82925	0.0646149	0.428124	110.246	0.5		0.81875	0.0017736	0.51026	61.5493	0.375
21Jul2017 02:23:57'	0.82825	0.058984	0.428124	108.073	0.25		0.81925	0.00186003	0.51026	60.0785	0.5
21Jul2017 02:33:57'	0.8285	0.0510147	0.428124	104.272	0.5		0.819	0.00529315	0.51026	58.8905	0.5
21Jul2017 02:43:58'	0.82825	0.0383544	0.428124	98.5694	0.25		0.818875	0.00815769	0.51026	57.9288	0.5
21Jul2017 02:53:58'	0.8285	0.0270366	0.428124	93.1386	0.25		0.818625	0.00879823	0.51026	57.759	0.375
21Jul2017 03:03:58'	0.82825	0.0185887	0.428124	89.337	0.25		0.818625	0.00830658	0.51026	57.9288	0.375
21Jul2017 03:13:58'	0.8285	0.0164897	0.428124	88.2508	0		0.81875	0.00668429	0.51026	58.4379	0.375
21Jul2017 03:23:57'	0.828	0.01845	0.428124	89.337	0		0.818375	0.00501528	0.51026	59.1167	0.375
21Jul2017 03:33:57'	0.82775	0.0141126	0.428124	87.4362	0		0.81825	0.00557362	0.51026	59.0602	0.5
21Jul2017 03:43:57'	0.82925	0.00869764	0.428124	84.1777	0.25		0.817375	0.00587014	0.51026	59.343	0.5
21Jul2017 03:53:57'	0.829	0.00222682	0.428124	81.1908	0.25		0.817	0.0056349	0.51026	59.6825	0.375
21Jul2017 04:03:58'	0.83025	0.00410914	0.428124	77.6607	0.25		0.817	0.00409111	0.51026	60.3047	0.25
21Jul2017 04:13:58'	0.83075	0.00351528	0.428124	77.6607	0.25		0.816375	0.0019593	0.51026	61.2099	0.125
21Jul2017 04:23:58'	0.8305	0.00145681	0.428124	78.7469	0.25		0.81625	0.000668325	0.51026	62.115	0.125
21Jul2017 04:33:57'	0.83025	0.00186094	0.428124	78.7469	0.25		0.815875	0.00238417	0.51026	62.7939	0.125
21Jul2017 04:43:57'	0.83	0.00334166	0.428124	78.2038	0.25		0.815625	0.00270829	0.51026	63.0201	0.25
21Jul2017 04:53:57'	0.829	0.00484403	0.428124	77.9323	0.25		0.81575	0.00368554	0.51026	63.3596	0.25
21Jul2017 05:03:57'	0.82975	0.00591461	0.428124	77.1177	0		0.81575	0.00383603	0.51026	63.4161	0.25
21Jul2017 05:13:58'	0.82925	0.00573436	0.428124	77.3892	0		0.8145	0.00406782	0.51026	63.8687	0.25
21Jul2017 05:23:58'	0.8275	0.00622756	0.428124	77.9323	0		0.8125	0.00501096	0.51026	64.8304	0.25
21Jul2017 05:33:58'	0.825	0.00641735	0.428124	79.0184	0		0.809625	0.00768401	0.51026	66.6973	0.125
21Jul2017 05:43:57'	0.8205	0.00681669	0.428124	80.9192	0.5		0.8045	0.0105028	0.51026	69.4127	0.75
21Jul2017 05:53:57'	0.81225	0.0121255	0.428124	82.2769	1.75		0.79775	0.00870449	0.51026	71.2229	3.125
21Jul2017 06:03:57'	0.79975	0.023488	0.428124	82.82	4.5		0.78525	9.65397e-05	0.51026	72.5807	8.375
21Jul2017 06:13:57'	0.7815	0.0429804	0.428124	82.2769	8.5		0.76775	0.0118875	0.51026	74.7304	15.875
21Jul2017 06:23:58'	0.76175	0.0625803	0.428124	82.2769	12.75		0.751625	0.0280692	0.51026	75.0132	25.125
21Jul2017 06:33:58'	0.7475	0.0774312	0.428124	82.0054	17.5		0.7375	0.0413241	0.51026	75.5223	35
21Jul2017 06:43:58'	0.7375	0.0880749	0.428124	81.7338	22.25		0.72925	0.0478755	0.51026	76.3143	45.125
21Jul2017 06:53:58'	0.7345	0.090463	0.428124	82.0054	27.25		0.72425	0.0549973	0.51026	75.7486	56.375
21Jul2017 07:03:57'	0.7335	0.0926404	0.428124	81.4623	32.75		0.717875	0.0592964	0.51026	76.5972	67
21Jul2017 07:13:57'	0.72925	0.0956661	0.428124	82.0054	37.75		0.709875	0.0633499	0.51026	78.068	80
21Jul2017 07:23:57'	0.725	0.0917965	0.428124	85.807	42.25		0.70225	0.0594977	0.51026	81.8017	108.625
21Jul2017 07:33:58'	0.7185	0.0879454	0.428124	90.6947	47		0.696125	0.0489652	0.51026	87.1194	139.875
21Jul2017 07:43:58'	0.7135	0.076304	0.428124	98.5694	51.5		0.688375	0.0374082	0.51026	93.2291	175
21Jul2017 07:53:58'	0.71475	0.0264655	0.428124	121.379	56.5		0.6825	0.0220162	0.51026	100.187	183.125
21Jul2017 08:03:58'	0.71625	0.0214901	0.428124	143.102	62		0.67475	0.013987	0.51026	105.562	198.25
21Jul2017 08:13:57'	0.71975	0.0707748	0.428124	164.554	68		0.66525	0.0114794	0.51026	109.691	211.375
21Jul2017 08:23:57'	0.71725	0.109408	0.428124	183.833	88.5		0.657	0.00946691	0.51026	113.255	224.5
21Jul2017 08:33:57'	0.70925	0.112329	0.428124	188.993	112.25		0.65075	0.00853418	0.51026	115.688	261.75
21Jul2017 08:43:57'	0.70125	0.114036	0.428124	193.609	127.75		0.644375	0.00899354	0.51026	117.668	274.75
21Jul2017 08:53:58'	0.69325	0.113443	0.428124	197.139	146.75		0.63925	0.00986105	0.51026	119.139	283.5
21Jul2017 09:03:58'	0.69325	0.118278	0.428124	199.311	151.25		0.635125	0.00901436	0.51026	120.779	284.5
21Jul2017 09:13:58'	0.687	0.117867	0.428124	202.027	166.25		0.622	0.0158257	0.51026	122.703	292.875
21Jul2017 09:23:57'	0.66275	0.108316	0.428124	208.815	196.75		0.606375	0.0233598	0.51026	125.361	305.75
21Jul2017 09:33:57'	0.633	0.0931638	0.428124	215.604	232.5		0.585625	0.0361981	0.51026	127.964	332.5
21Jul2017 09:43:57'	0.6005	0.0715038	0.428124	220.763	263.5		0.56325	0.0528623	0.51026	129.831	365.125
21Jul2017 09:53:57'	0.59025	0.0677818	0.428124	223.75	269.5		0.547625	0.0643012	0.51026	131.245	382.875
21Jul2017 10:03:58'	0.6115	0.0696867	0.428124	214.789	233.75		0.53475	0.0739199	0.51026	132.263	412
21Jul2017 10:13:58'	0.636	0.0750225	0.428124	205.828	187.25		0.519375	0.0871468	0.51026	132.942	431.875
21Jul2017 10:23:58'	0.6605	0.0858003	0.428124	199.311	148.75		0.500125	0.105872	0.51026	133.112	458.75
21Jul2017 10:33:58'	0.6705	0.0828522	0.428124	193.337	119		0.478875	0.128154	0.51026	132.772	494.875
21Jul2017 10:43:57'	0.665	0.0837144	0.428124	196.324	135.75		0.455375	0.154116	0.51026	131.811	526.75
21Jul2017 10:53:57'	0.65925	0.0821532	0.428124	198.225	154		0.432625	0.183632	0.51026	129.321	563.875
21Jul2017 11:03:57'	0.6475	0.0773269	0.428124	201.483	172.5		0.407	0.222282	0.51026	124.569	600.25
21Jul2017 11:13:58'	0.62375	0.05999	0.428124	204.47	196.75		0.369	0.278972	0.51026	118.064	640.875
21Jul2017 11:23:58'	0.613	0.0511087	0.428124	205.285	208.25		0.336375	0.334633	0.51026	110.37	683.25
21Jul2017 11:33:58'	0.591	0.0279429	0.428124	204.742	231.75		0.316875	0.363441	0.51026	106.976	723.125
21Jul2017 11:43:58'	0.5595	0.013466	0.428124	200.126	307.75		0.296875	0.392823	0.51026	103.751	756.125
21Jul2017 11:53:57'	0.556	0.0151408	0.428124	200.94	313		0.35525	0.313459	0.51026	111.219	661.875
21Jul2017 12:03:57'	0.55125	0.0191903	0.428124	201.212	315.25		0.4115	0.233295	0.51026	119.535	555.75
21Jul2017 12:13:57'	0.55775	0.00118616	0.428124	206.643	323		0.46675	0.158744	0.51026	126.719	454.125
21Jul2017 12:23:57'	0.594	0.0460291	0.428124	211.802	243		0.5485	0.0543468	0.51026	135.035	321.125
21Jul2017 12:33:58'	0.60225	0.0565493	0.428124	212.888	247.5		0.55525	0.0458055	0.51026	135.771	328.375
21Jul2017 12:43:58'	0.58275	0.0538495	0.428124	220.763	287.5		0.5545	0.0384387	0.51026	138.542	359.375
21Jul2017 12:53:58'	0.50275	0.0469198	0.428124	210.987	445.5		0.4835	0.117466	0.51026	135.431	486.375
21Jul2017 13:03:57'	0.4025	0.174979	0.428124	197.953	630.75		0.417125	0.197582	0.51026	130.227	625.75
21Jul2017 13:13:57'	0.407	0.179831	0.428124	193.609	607.75		0.43025	0.195134	0.51026	126.493	599.5
21Jul2017 13:23:57'	0.41575	0.180569	0.428124	189.264	590		0.43325	0.197738	0.51026	124.626	581.125
21Jul2017 13:33:57'	0.405	0.200647	0.428124	184.919	630.25		0.438	0.207576	0.51026	119.704	599.875
21Jul2017 13:43:58'	0.4075	0.185366	0.428124	190.893	649.75		0.430375	0.212151	0.51026	120.553	616.625
21Jul2017 13:53:58'	0.34175	0.254528	0.428124	189.264	819		0.369375	0.272233	0.51026	120.157	748.875
21Jul2017 14:03:58'	0.27975	0.328023	0.428124	183.833	953.25		0.3255	0.324985	0.51026	116.536	843.25
21Jul2017 14:13:58'	0.298	0.298203	0.428124	189.264	916		0.340125	0.301198	0.51026	119.478	809.875
21Jul2017 14:23:57'	0.31175	0.272257	0.428124	194.966	884.75		0.35425	0.282828	0.51026	120.892	781.375
21Jul2017 14:33:57'	0.34925	0.226598	0.428124	198.768	755.5		0.3875	0.244275	0.51026	123.268	686.125
21Jul2017 14:43:57'	0.366	0.194178	0.428124	206.1	710.75		0.4015	0.223474	0.51026	125.757	652.75
21Jul2017 14:53:57'	0.34375	0.22391	0.428124	202.57	769.25		0.393	0.234019	0.51026	124.965	692.875
21Jul2017 15:03:58'	0.30825	0.276833	0.428124	194.423	868.5		0.37375	0.265631	0.51026	120.723	778.625
21Jul2017 15:13:58'	0.228	0.387827	0.428124	180.032	1093.25		0.3235	0.336677	0.51026	113.142	962.5
21Jul2017 15:23:58'	0.1795	0.469333	0.428124	164.554	1166.25		0.303375	0.373238	0.51026	107.372	1036.5
21Jul2017 15:33:57'	0.207	0.42732	0.428124	171.342	1020.5		0.3335	0.350704	0.51026	104.713	942.75
21Jul2017 15:43:57'	0.279	0.330975	0.428124	182.747	799.75		0.382125	0.29138	0.51026	108.843	771.5
21Jul2017 15:53:57'	0.29125	0.309948	0.428124	186.82	741.5		0.394375	0.277538	0.51026	109.352	743.75
21Jul2017 16:03:57'	0.347	0.233438	0.428124	196.596	618		0.429125	0.236756	0.51026	111.671	624.125
21Jul2017 16:13:58'	0.329	0.247419	0.428124	198.496	658		0.450875	0.197897	0.51026	118.064	592.125
21Jul2017 16:23:58'	0.28925	0.305159	0.428124	190.079	767		0.436375	0.223951	0.51026	113.764	685.5
21Jul2017 16:33:58'	0.32475	0.246478	0.428124	200.94	709.25		0.46625	0.184963	0.51026	117.159	615.75
21Jul2017 16:43:58'	0.3495	0.21484	0.428124	204.199	660.5		0.4855	0.163415	0.51026	118.177	606
21Jul2017 16:53:57'	0.435	0.126976	0.428124	205.285	528.75		0.48975	0.163285	0.51026	116.819	605.875
21Jul2017 17:03:57'	0.511	0.0374994	0.428124	211.53	382.75		0.531625	0.107507	0.51026	122.193	485.125
21Jul2017 17:13:57'	0.569	0.0240259	0.428124	213.16	257		0.56575	0.0655536	0.51026	125.418	377.875
21Jul2017 17:23:58'	0.5905	0.0416437	0.428124	211.259	245.5		0.578625	0.0516594	0.51026	125.927	347.75
21Jul2017 17:33:58'	0.596	0.0510833	0.428124	213.16	254.25		0.59925	0.0290302	0.51026	126.889	296.75
21Jul2017 17:43:58'	0.6075	0.0618671	0.428124	212.888	238.5		0.61	0.0200557	0.51026	126.493	278.625
21Jul2017 17:53:58'	0.618	0.0664186	0.428124	210.173	220		0.6215	0.00982739	0.51026	126.097	260.875
21Jul2017 18:03:57'	0.638	0.0788906	0.428124	206.643	202.75		0.635	0.000506568	0.51026	125.022	237.875
21Jul2017 18:13:57'	0.662	0.085139	0.428124	198.225	158		0.653125	0.00998267	0.51026	121.967	200
21Jul2017 18:23:57'	0.677	0.0863577	0.428124	191.708	133.5		0.669625	0.0193485	0.51026	119.365	165.5
21Jul2017 18:33:57'	0.69575	0.0916706	0.428124	185.463	103.5		0.685375	0.0226395	0.51026	115.009	128.625
21Jul2017 18:43:58'	0.712	0.0945733	0.428124	179.217	75.25		0.701125	0.0302772	0.51026	112.237	99.5
21Jul2017 18:53:58'	0.72025	0.0961621	0.428124	176.23	62.75		0.713125	0.0348806	0.51026	109.691	82.75
21Jul2017 19:03:58'	0.7305	0.0986738	0.428124	172.7	51.25		0.723	0.0369868	0.51026	107.089	67.875
21Jul2017 19:13:57'	0.73775	0.0997713	0.428124	169.713	44.25		0.73075	0.0405174	0.51026	105.675	58.625
21Jul2017 19:23:57'	0.74325	0.100674	0.428124	167.541	38.25		0.738625	0.042201	0.51026	103.582	50.625
21Jul2017 19:33:57'	0.7505	0.10153	0.428124	164.554	33		0.74575	0.0435794	0.51026	101.658	43.25
21Jul2017 19:43:57'	0.75775	0.101969	0.428124	161.295	27.5		0.753	0.0455693	0.51026	99.8479	36
21Jul2017 19:53:58'	0.766	0.102068	0.428124	157.494	21		0.7615	0.0473261	0.51026	97.5851	27.25
21Jul2017 20:03:58'	0.77775	0.10548	0.428124	153.692	14.25		0.771625	0.0507387	0.51026	95.3222	18.625
21Jul2017 20:13:58'	0.79075	0.112479	0.428124	150.705	9		0.78475	0.0574223	0.51026	93.1159	11.625
21Jul2017 20:23:58'	0.80375	0.119089	0.428124	147.718	4.75		0.79625	0.0625699	0.51026	90.9097	5.875
21Jul2017 20:33:57'	0.81725	0.125572	0.428124	144.46	1.75		0.80775	0.0669577	0.51026	88.4771	2.125
21Jul2017 20:43:57'	0.82675	0.128622	0.428124	141.473	0.75		0.816	0.0690322	0.51026	86.384	0.625
21Jul2017 20:53:57'	0.832	0.12576	0.428124	137.671	0.25		0.82025	0.0670546	0.51026	84.2909	0
21Jul2017 21:03:58'	0.83475	0.123926	0.428124	135.499	0		0.823375	0.0655076	0.51026	82.7634	0
21Jul2017 21:13:58'	0.836	0.122888	0.428124	134.413	0		0.824	0.065079	0.51026	82.424	0
21Jul2017 21:23:58'	0.8355	0.122794	0.428124	134.413	0		0.823625	0.0650299	0.51026	82.5372	0
21Jul2017 21:33:58'	0.83525	0.124793	0.428124	135.499	0		0.823	0.0661892	0.51026	83.1594	0
21Jul2017 21:43:57'	0.8345	0.126703	0.428124	136.857	0		0.82175	0.0672509	0.51026	83.9514	0
21Jul2017 21:53:57'	0.8335	0.0958627	0.428124	137.943	0		0.821125	0.0508134	0.51026	84.3474	0
21Jul2017 22:03:57'	0.83325	0.064165	0.428124	138.214	0.25		0.82075	0.0339652	0.51026	84.404	0
21Jul2017 22:13:57'	0.83225	0.0322758	0.428124	138.757	0.25		0.8205	0.0170597	0.51026	84.2909	0
21Jul2017 22:23:58'	0.83225	0	0.428124	138.214	0.25		0.820375	0	0.51026	84.008	0
21Jul2017 22:33:58'	0.83225	0	0.428124	137.671	0.25		0.82025	0	0.51026	83.5554	0.125
21Jul2017 22:43:58'	0.832	0	0.428124	137.4	0.25		0.8195	0	0.51026	83.2726	0.125
21Jul2017 22:53:57'	0.832	0	0.428124	136.857	0.25		0.818625	0	0.51026	83.1029	0.125
21Jul2017 23:03:57'	0.83175	0	0.428124	136.585	0.25		0.817875	0	0.51026	82.8766	0.125
21Jul2017 23:13:57'	0.8315	0	0.428124	136.314	0.25		0.81725	0	0.51026	82.6503	0
21Jul2017 23:23:57'	0.83125	0	0.428124	136.042	0		0.816625	0	0.51026	82.5937	0.125
21Jul2017 23:33:58'	0.83075	0	0.428124	136.042	0		0.815875	0	0.51026	82.5372	0.25
21Jul2017 23:43:58'	0.83075	0	0.428124	135.771	0.25		0.815125	0	0.51026	82.5372	0.25
21Jul2017 23:53:58'	0.83025	0	0.428124	135.771	0.5		0.81425	0	0.51026	82.5937	0.25
22Jul2017 00:03:58'	0.82975	0	0.428124	135.771	0.75		0.813875	0	0.51026	82.3674	0.125
22Jul2017 00:13:57'	0.82925	0	0.428124	135.771	0.75		0.814125	0	0.51026	81.9149	0
22Jul2017 00:23:57'	0.829	0	0.428124	135.227	0.75		0.81425	0	0.51026	81.4057	0
22Jul2017 00:33:57'	0.8295	0	0.428124	134.141	0.5		0.814375	0	0.51026	80.6703	0.125
22Jul2017 00:43:58'	0.82975	0	0.428124	132.784	0.5		0.814	0	0.51026	79.8217	0.125
22Jul2017 00:53:58'	0.83075	0.00306458	0.355133	130.619	0.5		0.813875	0.00653952	0.504479	78.4685	0.125
22Jul2017 01:03:58'	0.8305	0.00575603	0.282142	129.54	0.25		0.8135	0.011905	0.498697	76.8888	0.125
22Jul2017 01:13:58'	0.8295	0.00749955	0.209152	128.461	0.25		0.81325	0.0163422	0.492916	75.2525	0
22Jul2017 01:23:57'	0.83	0.00738823	0.136161	125.481	0.25		0.81375	0.0185164	0.487135	72.824	0.125
22Jul2017 01:33:57'	0.83	0.00285029	0.136161	122.222	0.5		0.81375	0.013302	0.487135	70.7869	0.25
22Jul2017 01:43:57'	0.83	0.00477943	0.136161	116.79	0.5		0.814125	0.00754073	0.487135	68.467	0.375
22Jul2017 01:53:57'	0.831	0.013766	0.136161	109.728	0.5		0.8145	0.00196101	0.487135	66.2602	0.5
22Jul2017 02:03:58'	0.83	0.0229396	0.136161	104.025	0.25		0.8145	0.0018681	0.487135	64.9022	0.375
22Jul2017 02:13:58'	0.82975	0.0305129	0.136161	98.8641	0.25		0.814	0.00431581	0.487135	64.1666	0.375
22Jul2017 02:23:58'	0.83025	0.0356747	0.136161	94.79	0.25		0.8135	0.00554692	0.487135	63.8837	0.375
22Jul2017 02:33:57'	0.83	0.0368914	0.136161	94.2468	0.25		0.812875	0.00477067	0.487135	64.3363	0.25
22Jul2017 02:43:57'	0.8305	0.0324795	0.136161	96.9628	0.25		0.812375	0.00234034	0.487135	65.3549	0.25
22Jul2017 02:53:57'	0.831	0.0252198	0.136161	101.852	0		0.812375	0.00027542	0.487135	66.0905	0.25
22Jul2017 03:03:57'	0.83	0.0131223	0.136161	111.086	0.25		0.811625	0.00296314	0.487135	67.5051	0.125
22Jul2017 03:13:58'	0.829	0.00277549	0.136161	118.963	0.25		0.811125	0.00483008	0.487135	68.3538	0.125
22Jul2017 03:23:58'	0.8285	0.00402894	0.136161	124.123	0.25		0.811	0.00572248	0.487135	68.6933	0.125
22Jul2017 03:33:58'	0.82775	0.00675202	0.136161	126.568	0.25		0.81075	0.00578009	0.487135	68.8065	0
22Jul2017 03:43:58'	0.8275	0.00497186	0.136161	125.481	0.25		0.810875	0.00414504	0.487135	68.1275	0
22Jul2017 03:53:57'	0.82775	0.00356741	0.136161	124.395	0.25		0.810875	0.00238223	0.487135	67.4485	0
22Jul2017 04:03:57'	0.82775	0.000787174	0.136161	121.407	0.5		0.811375	0.000807933	0.487135	66.0905	0.125
22Jul2017 04:13:57'	0.82725	0.0069479	0.136161	117.333	0.5		0.811375	0.00353003	0.487135	65.0719	0.25
22Jul2017 04:23:58'	0.827	0.00954973	0.136161	115.704	0.5		0.811375	0.00396223	0.487135	64.9022	0.375
22Jul2017 04:33:58'	0.82675	0.00901297	0.136161	116.247	0.75		0.811625	0.00383411	0.487135	64.8456	0.5
22Jul2017 04:43:58'	0.826	0.00516174	0.136161	119.506	0.5		0.8105	0.00228462	0.487135	65.7509	0.375
22Jul2017 04:53:58'	0.82525	0.000823825	0.136161	124.395	0.5		0.81025	0.00100923	0.487135	66.2602	0.375
22Jul2017 05:03:57'	0.825	0.0016828	0.136161	125.21	0.25		0.81075	0.00188082	0.487135	65.8075	0.375
22Jul2017 05:13:57'	0.825	0.00031957	0.136161	123.852	0		0.81	0.00227209	0.487135	65.9207	0.25
22Jul2017 05:23:57'	0.8235	0.000548333	0.136161	124.667	0.25		0.80925	0.00237101	0.487135	66.2036	0.375
22Jul2017 05:33:57'	0.822	0.00310552	0.136161	123.852	0.25		0.807	0.00146785	0.487135	67.3353	0.25
22Jul2017 05:43:58'	0.81825	0.00316341	0.136161	126.568	0		0.803125	0.00220399	0.487135	69.9948	0.125
22Jul2017 05:53:58'	0.8125	0.00737404	0.136161	127.654	0.5		0.797625	0.00267982	0.487135	72.145	1
22Jul2017 06:03:58'	0.806	0.0245913	0.136161	120.049	1.5		0.7925	0.00203736	0.487135	72.4279	2
22Jul2017 06:13:57'	0.79575	0.0486911	0.136161	110.271	3		0.7855	0.010214	0.487135	72.2581	4.25
22Jul2017 06:23:57'	0.782	0.0784715	0.136161	98.8641	6		0.772875	0.0248781	0.487135	71.8621	9.125
22Jul2017 06:33:57'	0.76225	0.108928	0.136161	91.2591	11.25		0.753	0.0361395	0.487135	75.4269	18.625
22Jul2017 06:43:57'	0.743	0.125127	0.136161	93.432	17.25		0.733375	0.0444851	0.487135	79.7273	30.5
22Jul2017 06:53:58'	0.73275	0.125027	0.136161	100.765	23.75		0.716625	0.0475907	0.487135	84.7633	44.875
22Jul2017 07:03:58'	0.72775	0.110815	0.136161	114.346	30.75		0.70525	0.0413352	0.487135	91.0441	60.875
22Jul2017 07:13:58'	0.731	0.0825017	0.136161	132	37		0.702375	0.0299886	0.487135	95.8538	75.375
22Jul2017 07:23:58'	0.73575	0.0543232	0.136161	148.568	43		0.6965	0.0153486	0.487135	102.983	100.25
22Jul2017 07:33:57'	0.73425	0.0311918	0.136161	165.95	49		0.688875	0.00149666	0.487135	110.566	128
22Jul2017 07:43:57'	0.7315	0.0177168	0.136161	177.358	54.25		0.677375	0.00359374	0.487135	116.45	157
22Jul2017 07:53:57'	0.72775	0.0139763	0.136161	182.79	58.5		0.669	0.00489506	0.487135	119.959	195.875
22Jul2017 08:03:58'	0.72375	0.0138968	0.136161	185.778	63.5		0.65975	0.00173896	0.487135	122.222	215.25
22Jul2017 08:13:58'	0.72025	0.0154512	0.136161	187.136	68		0.652625	0.00198799	0.487135	123.41	222.625
22Jul2017 08:23:58'	0.71825	0.0163203	0.136161	187.95	71.25		0.647875	0.00368243	0.487135	124.485	223
22Jul2017 08:33:58'	0.71375	0.017348	0.136161	190.395	79.5		0.64025	0.00857074	0.487135	125.447	224.875
22Jul2017 08:43:57'	0.708	0.0195379	0.136161	192.839	87.75		0.63175	0.013331	0.487135	126.692	240.375
22Jul2017 08:53:57'	0.7015	0.0223024	0.136161	195.555	98.75		0.620375	0.0209032	0.487135	127.937	265.25
22Jul2017 09:03:57'	0.69725	0.0238446	0.136161	197.457	104.5		0.613375	0.0234327	0.487135	129.465	285.75
22Jul2017 09:13:57'	0.697	0.0251134	0.136161	196.642	104.75		0.604	0.0275653	0.487135	131.276	297
22Jul2017 09:23:58'	0.698	0.0249175	0.136161	196.099	104.75		0.5975	0.0296688	0.487135	132.803	305.25
22Jul2017 09:33:58'	0.69975	0.0241786	0.136161	195.284	103		0.591125	0.0316318	0.487135	134.331	321.625
22Jul2017 09:43:58'	0.69875	0.0246105	0.136161	195.827	107.75		0.58025	0.039832	0.487135	135.236	338.125
22Jul2017 09:53:57'	0.69525	0.0254848	0.136161	197.728	113.75		0.570875	0.0445282	0.487135	136.821	356.25
22Jul2017 10:03:57'	0.69125	0.0272569	0.136161	199.358	120.5		0.563125	0.0496736	0.487135	137.726	373.125
22Jul2017 10:13:57'	0.6845	0.0307248	0.136161	201.802	130		0.547375	0.0601814	0.487135	139.65	393.625
22Jul2017 10:23:57'	0.6665	0.0351563	0.136161	211.308	164.75		0.53325	0.0688855	0.487135	141.687	415.25
22Jul2017 10:33:58'	0.65025	0.0440708	0.136161	216.469	192.75		0.507125	0.0922151	0.487135	142.875	453.375
22Jul2017 10:43:58'	0.634	0.051798	0.136161	222.444	221.5		0.492	0.105972	0.487135	143.441	453
22Jul2017 10:53:58'	0.62525	0.0554884	0.136161	225.975	256		0.49575	0.101192	0.487135	143.781	427.125
22Jul2017 11:03:58'	0.603	0.0763068	0.136161	227.061	326.75		0.473125	0.13005	0.487135	141.404	447.75
22Jul2017 11:13:57'	0.548	0.132122	0.136161	226.518	428.75		0.464625	0.145011	0.487135	138.745	443.375
22Jul2017 11:23:57'	0.4845	0.199421	0.136161	223.802	538.5		0.443375	0.176112	0.487135	134.954	470.375
22Jul2017 11:33:57'	0.41525	0.272145	0.136161	221.358	646.5		0.407875	0.223291	0.487135	130.483	506.25
22Jul2017 11:43:58'	0.364	0.344807	0.136161	206.148	714.25		0.39125	0.247762	0.487135	127.428	506.5
22Jul2017 11:53:58'	0.33125	0.391756	0.136161	196.099	766.75		0.374	0.279137	0.487135	122.052	513
22Jul2017 12:03:58'	0.30675	0.431239	0.136161	185.506	818		0.3615	0.29954	0.487135	118.884	530
22Jul2017 12:13:58'	0.27975	0.47162	0.136161	176	864		0.360125	0.311461	0.487135	114.923	551.125
22Jul2017 12:23:57'	0.25425	0.501728	0.136161	172.741	901.75		0.35925	0.320282	0.487135	111.811	576.875
22Jul2017 12:33:57'	0.22875	0.534882	0.136161	167.308	948		0.355625	0.328379	0.487135	110	608.75
22Jul2017 12:43:57'	0.1995	0.568739	0.136161	164.049	992.25		0.34075	0.350909	0.487135	107.171	642.5
22Jul2017 12:53:57'	0.1725	0.601109	0.136161	160.247	1036.5		0.315	0.38483	0.487135	104.285	674.625
22Jul2017 13:03:58'	0.1715	0.603295	0.136161	159.432	1015		0.298375	0.406811	0.487135	102.248	677.625
22Jul2017 13:13:58'	0.16825	0.608903	0.136161	157.802	1008.5		0.279	0.430429	0.487135	100.833	681.5
22Jul2017 13:23:58'	0.1755	0.603577	0.136161	156.444	959.25		0.25675	0.466541	0.487135	96.3631	674.5
22Jul2017 13:33:57'	0.23375	0.529265	0.136161	167.852	799		0.28025	0.449187	0.487135	94.6089	600.125
22Jul2017 13:43:57'	0.27225	0.477312	0.136161	177.358	694		0.321875	0.411267	0.487135	94.2128	537.625
22Jul2017 13:53:57'	0.34925	0.368801	0.136161	199.629	534.25		0.383375	0.344727	0.487135	97.0986	450.75
22Jul2017 14:03:57'	0.333	0.382777	0.136161	201.259	663		0.38575	0.342392	0.487135	97.1552	516.75
22Jul2017 14:13:58'	0.378	0.336914	0.136161	201.802	579.75		0.438125	0.280201	0.487135	101.06	447.625
22Jul2017 14:23:58'	0.46525	0.250746	0.136161	200.987	466.75		0.60175	0.188555	0.487135	82.7828	356.375
22Jul2017 14:33:58'	0.54125	0.206172	0.136161	178.716	377.25
22Jul2017 14:43:58'	0.70425	0.0461629	0.136161	176.543	33.5
22Jul2017 14:53:57'	0.75475	0.0119093	0.136161	165.136	10
22Jul2017 15:03:57'	0.732	0.0477092	0.136161	155.901	15.25
22Jul2017 15:13:57'	0.67475	0.104635	0.136161	156.173	19.5
22Jul2017 15:23:58'	0.64075	0.137191	0.136161	157.259	24.25
22Jul2017 15:33:58'	0.623	0.153306	0.136161	158.345	30.75
22Jul2017 15:43:58'	0.6455	0.131215	0.136161	158.074	32.25
22Jul2017 15:53:58'	0.696	0.0780263	0.136161	159.975	30.5				0.474348	11.5432	149
22Jul2017 16:03:57'	0.725	0.0496745	0.136161	159.432	30.75		0.646	0.310595	0.474348	13.4671	178.75
22Jul2017 16:13:57'	0.73775	0.0392725	0.136161	157.802	31.25		0.67525	0.276989	0.474348	14.8251	197.25
22Jul2017 16:23:57'	0.7435	0.035826	0.136161	156.173	31.75		0.672	0.280233	0.474348	14.8251	215.5
22Jul2017 16:33:57'	0.7445	0.038227	0.136161	153.728	32.25		0.673	0.277393	0.474348	15.3909	211.25
22Jul2017 16:43:58'	0.7405	0.0330936	0.136161	160.247	36.25		0.669	0.281036	0.474348	15.5041	194.5
22Jul2017 16:53:58'	0.74	0.0289014	0.136161	163.506	35.75		0.66975	0.281739	0.474348	15.0514	185.75
22Jul2017 17:03:58'	0.7375	0.0242282	0.136161	168.666	38.25		0.66825	0.285089	0.474348	14.4856	208
22Jul2017 17:13:57'	0.73825	0.0195992	0.136161	171.383	38.75		0.656	0.301717	0.474348	13.1276	204.5
22Jul2017 17:23:57'	0.74475	0.0208241	0.136161	165.95	33		0.65425	0.308568	0.474348	11.5432	194.25
22Jul2017 17:33:57'	0.749	0.0190142	0.136161	164.321	31		0.64925	0.31866	0.474348	9.95884	178
22Jul2017 17:43:57'	0.759	0.0177778	0.136161	158.074	22		0.66575	0.302162	0.474348	9.95884	115.5
22Jul2017 17:53:58'	0.7745	0.00765504	0.136161	154.271	15.25		0.6995	0.270605	0.474348	9.27982	86.75
22Jul2017 18:03:58'	0.79125	0.00579893	0.136161	143.679	9.75
22Jul2017 18:13:58'	0.8095	0.00363464	0.136161	132.271	2.75
22Jul2017 18:23:58'	0.82125	0.00220299	0.136161	124.938	1.5
22Jul2017 18:33:57'	0.82425	0.00937596	0.136161	117.876	1.25
22Jul2017 18:43:57'	0.82125	0.010896	0.136161	118.963	1.75
22Jul2017 18:53:57'	0.815	0.015861	0.136161	119.778	2.25
22Jul2017 19:03:58'	0.8145	0.0171006	0.136161	119.234	2.5
22Jul2017 19:13:58'	0.81525	0.0163249	0.136161	119.234	2.5
22Jul2017 19:23:58'	0.81825	0.013379	0.136161	119.234	2.25
22Jul2017 19:33:58'	0.82375	0.00824337	0.136161	118.963	1.75
22Jul2017 19:43:57'	0.82575	0.00669218	0.136161	118.691	1.5
22Jul2017 19:53:57'	0.8265	0.00620264	0.136161	118.42	1.5
22Jul2017 20:03:57'	0.83	0.00537669	0.136161	116.518	1
22Jul2017 20:13:57'	0.8345	0.00402601	0.136161	114.346	0.5
22Jul2017 20:23:58'	0.83725	0.00352274	0.136161	112.716	0
22Jul2017 20:33:58'	0.84075	0.00304701	0.136161	110.543	0.25
22Jul2017 20:43:58'	0.842	0.00514005	0.136161	108.099	0.25
22Jul2017 20:53:57'	0.84275	0.00717879	0.136161	106.197	0.5
22Jul2017 21:03:57'	0.84325	0.00872566	0.136161	104.839	0.5
22Jul2017 21:13:57'	0.843	0.00873169	0.136161	105.111	0.5
22Jul2017 21:23:57'	0.8435	0.00719752	0.136161	105.926	0.5
22Jul2017 21:33:58'	0.8435	0.00587258	0.136161	106.741	0.5
22Jul2017 21:43:58'	0.8435	0.00533401	0.136161	107.012	0.25
22Jul2017 21:53:58'	0.84425	0.00438684	0.136161	105.383	0.25
22Jul2017 22:03:58'	0.84425	0.00290713	0.136161	105.654	0.25
22Jul2017 22:13:57'	0.84475	0.00171907	0.136161	105.654	0.25
22Jul2017 22:23:57'	0.84475	0	0.136161	106.197	0.25
22Jul2017 22:33:57'	0.844	0	0.136161	106.469	0.25
22Jul2017 22:43:58'	0.843	0	0.136161	106.469	0.25
22Jul2017 22:53:58'	0.84275	0	0.136161	105.926	0
22Jul2017 23:03:58'	0.842	0	0.136161	106.197	0
22Jul2017 23:13:58'	0.84225	0	0.136161	107.012	0
22Jul2017 23:23:57'	0.842	0	0.136161	107.012	0
22Jul2017 23:33:57'	0.841	0	0.136161	107.284	0
22Jul2017 23:43:57'	0.8405	0	0.136161	107.012	0
22Jul2017 23:53:57'	0.83875	0	0.136161	107.827	0
23Jul2017 00:03:58'	0.8395	0	0.136161	107.284	0
23Jul2017 00:13:58'	0.83925	0	0.136161	107.555	0
23Jul2017 00:23:58'	0.83975	0	0.136161	108.099	0.25
23Jul2017 00:33:57'	0.84025	0	0.136161	107.827	0.25
23Jul2017 00:43:57'	0.84	0	0.136161	108.913	0.25
23Jul2017 00:53:57'	0.8405	0.00105016	0.135313	109.463	0.25
23Jul2017 01:03:57'	0.83975	0.00212014	0.134465	110.013	0
23Jul2017 01:13:58'	0.84	0.00342145	0.133618	110.291	0
23Jul2017 01:23:58'	0.83925	0.00492473	0.13277	110.569	0.25
23Jul2017 01:33:58'	0.83925	0.00541075	0.13277	110.297	0.25
23Jul2017 01:43:58'	0.8395	0.00565022	0.13277	110.026	0.5
23Jul2017 01:53:57'	0.83925	0.00590442	0.13277	110.026	0.75
23Jul2017 02:03:57'	0.83975	0.00472429	0.13277	110.569	0.5
23Jul2017 02:13:57'	0.83875	0.00345502	0.13277	112.199	0.5
23Jul2017 02:23:58'	0.83825	0.00203881	0.13277	113.557	0.5
23Jul2017 02:33:58'	0.83725	0.00113177	0.13277	114.916	0.5
23Jul2017 02:43:58'	0.8365	0.00182293	0.13277	114.916	0.5
23Jul2017 02:53:58'	0.83675	0.00244028	0.13277	114.372	0.5
23Jul2017 03:03:57'	0.83675	0.00287626	0.13277	114.101	0.5
23Jul2017 03:13:57'	0.83725	0.0021833	0.13277	114.372	0.25
23Jul2017 03:23:57'	0.8365	0.000743122	0.13277	116.002	0.25
23Jul2017 03:33:57'	0.8365	0.000556769	0.13277	116.817	0.25
23Jul2017 03:43:58'	0.83975	0.00121348	0.13277	114.916	0.25
23Jul2017 04:53:33'	0.839	0.000833734	0.13277	115.187	0.5
23Jul2017 05:03:34'	0.83975	0.000140939	0.13277	114.101	0.5
23Jul2017 05:13:34'	0.839	0.000166594	0.13277	114.372	0.5
23Jul2017 05:23:34'	0.83525	0.000386026	0.13277	116.817	0.25
23Jul2017 05:33:33'	0.834	0.000322598	0.13277	118.176	0
23Jul2017 05:43:33'	0.8315	0.000901146	0.13277	120.349	0
23Jul2017 05:53:33'	0.8295	0.000641976	0.13277	121.707	0
23Jul2017 06:03:33'	0.82625	0.000777784	0.13277	123.066	0.25
23Jul2017 06:13:34'	0.824	0.00371556	0.13277	122.522	0.75
23Jul2017 06:23:34'	0.8205	0.00962085	0.13277	120.892	1.25
23Jul2017 06:33:34'	0.81475	0.0175045	0.13277	119.262	2
23Jul2017 06:43:33'	0.8095	0.0266316	0.13277	116.546	2.75
23Jul2017 06:53:33'	0.80425	0.0364541	0.13277	113.286	3.5
23Jul2017 07:03:33'	0.80025	0.0445342	0.13277	110.297	4.5
23Jul2017 07:13:33'	0.79975	0.0482476	0.13277	108.124	5
23Jul2017 07:23:34'	0.8015	0.0472201	0.13277	107.581	5.5
23Jul2017 07:33:34'	0.8045	0.0435198	0.13277	108.124	5.75
23Jul2017 07:43:34'	0.8045	0.040805	0.13277	110.026	7.25
23Jul2017 07:53:34'	0.80275	0.0372255	0.13277	113.829	9.5
23Jul2017 08:03:33'	0.7975	0.0317439	0.13277	121.436	12.5
23Jul2017 08:13:33'	0.79175	0.0238096	0.13277	131.216	15.5
23Jul2017 08:23:33'	0.78875	0.0124634	0.13277	141.539	17.75
23Jul2017 08:33:34'	0.7855	0.00381872	0.13277	149.961	20
23Jul2017 08:43:34'	0.78375	0.000255186	0.13277	154.036	20.25
23Jul2017 08:53:34'	0.78125	0.00123761	0.13277	156.481	21
23Jul2017 09:03:34'	0.77875	0.00125562	0.13277	158.111	21.75
23Jul2017 09:13:33'	0.7765	0.00127527	0.13277	159.741	22
23Jul2017 09:23:33'	0.77475	0.000932915	0.13277	160.828	23.75
23Jul2017 09:33:33'	0.772	0.000232096	0.13277	162.186	27
23Jul2017 09:43:33'	0.77175	0.000975055	0.13277	161.643	28.5
23Jul2017 09:53:34'	0.76825	0.00315453	0.13277	162.458	33
23Jul2017 10:03:34'	0.764	0.0055934	0.13277	163.816	35.75
23Jul2017 10:13:34'	0.76	0.00857511	0.13277	164.631	38.75
23Jul2017 10:23:33'	0.75375	0.0109656	0.13277	167.348	44
23Jul2017 10:33:33'	0.74875	0.014496	0.13277	168.434	49
23Jul2017 10:43:33'	0.7455	0.0166005	0.13277	169.249	54.75
23Jul2017 10:53:33'	0.739	0.0199031	0.13277	171.423	64.5
23Jul2017 11:03:34'	0.73775	0.021434	0.13277	171.151	70
23Jul2017 11:13:34'	0.7345	0.0220078	0.13277	173.053	78.5
23Jul2017 11:23:34'	0.73675	0.019757	0.13277	173.053	84
23Jul2017 11:33:34'	0.741	0.017565	0.13277	171.694	78.75
23Jul2017 11:43:33'	0.7315	0.0239952	0.13277	173.868	77.5
23Jul2017 11:53:33'	0.73025	0.0263395	0.13277	173.053	77.5
23Jul2017 12:03:33'	0.71975	0.0352936	0.13277	174.139	87.25					8.94241	334.25
23Jul2017 12:13:34'	0.7155	0.039482	0.13277	174.139	88.75					8.03685	355.25
23Jul2017 12:23:34'	0.72075	0.0377466	0.13277	171.694	88.75
23Jul2017 12:33:34'	0.71725	0.0402818	0.13277	172.509	90
23Jul2017 12:43:34'	0.7185	0.0393222	0.13277	172.238	77.75
23Jul2017 12:53:33'	0.71925	0.0397463	0.13277	171.423	74.5
23Jul2017 13:03:33'	0.722	0.0389664	0.13277	170.064	69
23Jul2017 13:13:33'	0.73175	0.034829	0.13277	165.989	53.25
23Jul2017 13:23:33'	0.739	0.0318058	0.13277	163.001	45.5
23Jul2017 13:33:34'	0.74025	0.0313311	0.13277	162.458	42.75
23Jul2017 13:43:34'	0.73975	0.0308926	0.13277	163.001	42.75
23Jul2017 13:53:34'	0.7425	0.0301456	0.13277	161.643	40
23Jul2017 14:03:34'	0.7415	0.0326465	0.13277	160.556	36.5
23Jul2017 14:13:33'	0.7525	0.0274635	0.13277	156.481	27
23Jul2017 14:23:33'	0.76675	0.0210266	0.13277	151.048	17
23Jul2017 14:33:33'	0.7795	0.0126967	0.13277	147.788	11.75
23Jul2017 14:43:34'	0.78875	0.00616643	0.13277	145.886	9
23Jul2017 14:53:34'	0.7775	0.0245918	0.13277	140.724	19
23Jul2017 15:03:34'	0.7525	0.0352968	0.13277	150.776	40.25
23Jul2017 15:13:34'	0.73425	0.0456692	0.13277	156.481	51.25
23Jul2017 15:23:33'	0.72025	0.0522878	0.13277	161.643	65.25
23Jul2017 15:33:33'	0.72225	0.0381219	0.13277	170.336	65
23Jul2017 15:43:33'	0.7365	0.03361	0.13277	163.544	48.75
23Jul2017 15:53:34'	0.74475	0.030242	0.13277	160.013	40.75
23Jul2017 16:03:34'	0.76025	0.0220385	0.13277	154.851	24.5
23Jul2017 16:13:34'	0.77375	0.0168025	0.13277	148.874	14.5
23Jul2017 16:23:34'	0.7865	0.00787997	0.13277	146.157	9.25
23Jul2017 16:33:33'	0.796	0.00329525	0.13277	142.626	6
23Jul2017 16:43:33'	0.7985	0.00550382	0.13277	139.366	6.25
23Jul2017 16:53:33'	0.7925	0.0112486	0.13277	139.637	7.75
23Jul2017 17:03:33'	0.78675	0.0211462	0.13277	136.649	10
23Jul2017 17:13:34'	0.78	0.0328662	0.13277	133.117	10.5
23Jul2017 17:23:34'	0.7785	0.0357509	0.13277	132.031	10.25
23Jul2017 17:33:34'	0.7785	0.0361024	0.13277	131.759	10.5
23Jul2017 17:43:33'	0.77925	0.0344755	0.13277	132.302	10
23Jul2017 17:53:33'	0.777	0.028708	0.13277	138.007	12.5
23Jul2017 18:03:33'	0.77425	0.02958	0.13277	139.366	13
23Jul2017 18:13:33'	0.77875	0.0259068	0.13277	138.822	10.75
23Jul2017 18:23:34'	0.78	0.0227146	0.13277	140.181	10.25
23Jul2017 18:33:34'	0.781	0.023995	0.13277	138.551	9
23Jul2017 18:43:34'	0.78425	0.0203973	0.13277	138.822	8.75
23Jul2017 18:53:34'	0.781	0.0238826	0.13277	138.551	10.25
23Jul2017 19:03:33'	0.782	0.0246082	0.13277	137.464	9.75
23Jul2017 19:13:33'	0.78675	0.0204516	0.13277	137.192	8.5
23Jul2017 19:23:33'	0.78475	0.0223687	0.13277	137.192	9
23Jul2017 19:33:34'	0.78975	0.0165261	0.13277	137.736	7.25
23Jul2017 19:43:34'	0.798	0.00737975	0.13277	138.279	5.75
23Jul2017 19:53:34'	0.806	0.000698963	0.13277	138.279	4.5
23Jul2017 20:03:34'	0.8185	0.0150785	0.13277	139.637	2.5
23Jul2017 20:13:33'	0.8295	0.0256654	0.13277	139.366	1.5
23Jul2017 20:23:33'	0.8345	0.0294378	0.13277	138.551	1
23Jul2017 20:33:33'	0.84025	0.0330614	0.13277	136.921	0.5
23Jul2017 20:43:33'	0.84525	0.0327117	0.13277	133.117	0
23Jul2017 20:53:34'	0.84875	0.0328041	0.13277	130.672	0
23Jul2017 21:03:34'	0.85075	0.0325062	0.13277	129.042	0.25
23Jul2017 21:13:34'	0.8515	0.0322196	0.13277	128.499	0.25
23Jul2017 21:23:33'	0.85125	0.0334762	0.13277	129.586	0.25
23Jul2017 21:33:33'	0.8505	0.0340995	0.13277	130.672	0.25
23Jul2017 21:43:33'	0.85075	0.0332555	0.13277	129.857	0
23Jul2017 21:53:33'	0.851	0.0247889	0.13277	128.499	0
23Jul2017 22:03:34'	0.851	0.0156349	0.13277	127.141	0
23Jul2017 22:13:34'	0.8505	0.00693952	0.13277	125.239	0
23Jul2017 22:23:34'	0.84925	0	0.13277	125.511	0.25
23Jul2017 22:33:34'	0.8485	0	0.13277	125.511	0.25
23Jul2017 22:43:33'	0.84775	0	0.13277	126.054	0.25
23Jul2017 22:53:33'	0.847	0	0.13277	127.956	0.25
23Jul2017 23:03:33'	0.847	0	0.13277	128.499	0
23Jul2017 23:13:34'	0.84625	0	0.13277	128.499	0
23Jul2017 23:23:34'	0.84625	0	0.13277	127.684	0
23Jul2017 23:33:34'	0.8465	0	0.13277	125.511	0.25
23Jul2017 23:43:34'	0.84625	0	0.13277	124.424	0.25
23Jul2017 23:53:33'	0.848	0	0.13277	122.794	0.25
24Jul2017 00:03:33'	0.84775	0	0.13277	123.609	0.25
24Jul2017 00:13:33'	0.84775	0	0.13277	124.967	0.25
24Jul2017 00:23:34'	0.84775	0	0.13277	125.782	0.5
24Jul2017 00:33:34'	0.8465	0	0.13277	129.857	0.75
24Jul2017 00:43:34'	0.84675	0	0.13277	130.672	1
24Jul2017 00:53:34'	0.8465	0.00172295	0.0995774	131.767	0.75
24Jul2017 01:03:33'	0.846	0.0028367	0.0663849	132.861	0.75
24Jul2017 01:13:33'	0.845	0.0035369	0.0331925	131.782	0.5
24Jul2017 01:23:33'	0.844	0.00444969	0	131.518	0.5
24Jul2017 01:33:33'	0.844	0.00367927	0	130.975	0.5
24Jul2017 01:43:34'	0.844	0.00373096	0	130.975	0.5
24Jul2017 01:53:34'	0.8445	0.00428332	0	130.975	0.75
24Jul2017 02:03:34'	0.84475	0.00469105	0	131.246	0.5
24Jul2017 02:13:34'	0.84425	0.00517156	0	132.062	0.75
24Jul2017 02:23:33'	0.84425	0.00501648	0	132.062	0.5
24Jul2017 02:33:33'	0.84375	0.00446412	0	132.062	0.5
24Jul2017 02:43:33'	0.8435	0.00405639	0	131.79	0.5
24Jul2017 02:53:34'	0.843	0.00375853	0	131.79	0.5
24Jul2017 03:03:34'	0.84275	0.00329678	0	131.518	0.75
24Jul2017 03:13:34'	0.84275	0.00257308	0	130.975	0.75
24Jul2017 03:23:34'	0.8425	0.00127	0	130.16	1
24Jul2017 03:33:33'	0.8435	0.000556212	0	127.986	1
24Jul2017 03:43:33'	0.843	0.00181371	0	127.442	0.75
24Jul2017 03:53:33'	0.84225	0.00234104	0	127.442	0.75
24Jul2017 04:03:34'	0.842	0.00223813	0	127.714	0.5
24Jul2017 04:13:34'	0.84025	0.00130308	0	129.888	0.25
24Jul2017 04:23:34'	0.84	0.000141131	0	130.975	0.25
24Jul2017 04:33:34'	0.83975	0.000915773	0	132.062	0
24Jul2017 04:43:33'	0.8395	0.00155019	0	132.877	0
24Jul2017 04:53:33'	0.84	0.00175925	0	132.605	0.25
24Jul2017 05:03:33'	0.84	0.00117605	0	132.062	0.25
24Jul2017 05:13:33'	0.84	6.26582e-05	0	131.246	0.5
24Jul2017 05:23:34'	0.8395	0.00111399	0	130.703	0.5
24Jul2017 05:33:34'	0.83775	0.00258829	0	130.975	0.25
24Jul2017 05:43:34'	0.835	0.00276723	0	133.149	0.25
24Jul2017 05:53:34'	0.831	0.00218644	0	136.953	0
24Jul2017 06:03:33'	0.82775	0.00167312	0	139.942	0
24Jul2017 06:13:33'	0.825	0.00144548	0	142.387	0.25
24Jul2017 06:23:33'	0.82125	0.00399958	0	143.474	0.75
24Jul2017 06:33:34'	0.819	0.00706606	0	142.659	1
24Jul2017 06:43:34'	0.814	0.0121423	0	142.659	1.5
24Jul2017 06:53:34'	0.808	0.0181396	0	142.659	2.25
24Jul2017 07:03:34'	0.8025	0.024199	0	142.116	2.75
24Jul2017 07:13:33'	0.79425	0.0325524	0	142.116	5
24Jul2017 07:23:33'	0.78625	0.0421628	0	140.757	6.75
24Jul2017 07:33:33'	0.77975	0.0509698	0	138.855	9
24Jul2017 07:43:34'	0.77675	0.0555669	0	137.496	10.5
24Jul2017 07:53:34'	0.773	0.0592112	0	137.496	12.25
24Jul2017 08:03:34'	0.776	0.0528611	0	140.214	13
24Jul2017 08:13:34'	0.7795	0.0467268	0	142.387	14.5
24Jul2017 08:23:33'	0.7775	0.0430631	0	147.007	16.75
24Jul2017 08:33:33'	0.777	0.0385982	0	151.083	22.5
24Jul2017 08:43:33'	0.77425	0.0397149	0	152.442	27
24Jul2017 08:53:33'	0.77075	0.0399563	0	155.159	29.5
24Jul2017 09:03:34'	0.76625	0.0428538	0	156.518	32.25
24Jul2017 09:13:34'	0.76525	0.0435099	0	156.789	30.75
24Jul2017 09:23:34'	0.76425	0.0435303	0	157.604	27.25
24Jul2017 09:33:34'	0.76425	0.0438325	0	157.333	28.5
24Jul2017 09:43:33'	0.764	0.0418382	0	159.235	25.5
24Jul2017 09:53:33'	0.765	0.0414936	0	158.691	25.75
24Jul2017 10:03:33'	0.76325	0.0425769	0	159.235	30.5
24Jul2017 10:13:34'	0.7605	0.0432973	0	160.865	30.5
24Jul2017 10:23:34'	0.763	0.0430973	0	158.963	34
24Jul2017 10:33:34'	0.76025	0.0443429	0	160.322	34.75
24Jul2017 10:43:34'	0.75825	0.045603	0	160.865	34.75
24Jul2017 10:53:33'	0.755	0.0472721	0	162.224	39
24Jul2017 11:03:33'	0.74825	0.0520617	0	163.854	37.75
24Jul2017 11:13:33'	0.7455	0.0530323	0	165.213	40
24Jul2017 11:23:34'	0.73475	0.058502	0	169.561	53.75
24Jul2017 11:33:34'	0.725	0.0631204	0	173.637	50.25
24Jul2017 11:43:34'	0.72275	0.0642769	0	174.452	59.75
24Jul2017 11:53:34'	0.71675	0.0670882	0	177.169	55.5
24Jul2017 12:03:33'	0.72025	0.0660509	0	175.267	51
24Jul2017 12:13:33'	0.72575	0.0628927	0	173.365	49.25
24Jul2017 12:23:33'	0.72425	0.0625158	0	174.995	44
24Jul2017 12:33:33'	0.6595	0.119639	0	181.245	104.75
24Jul2017 12:43:34'	0.59575	0.178353	0	185.321	159.75
24Jul2017 12:53:34'	0.56775	0.201797	0	189.125	195					75.4056	472.75
24Jul2017 13:03:34'	0.54875	0.219366	0	190.212	233.5		0.552			116.618	658.5
24Jul2017 13:13:34'	0.49325	0.262543	0	200.266	359		0.57875			115.882	378.625
24Jul2017 13:23:33'	0.4595	0.294956	0	201.353	488.75		0.569625			115.769	332.625
24Jul2017 13:33:33'	0.37425	0.373559	0	206.788	671.75		0.55			116.448	392.625
24Jul2017 13:43:33'	0.27925	0.46662	0	208.418	855.25		0.55575			115.826	406
24Jul2017 13:53:34'	0.29225	0.462215	0	201.353	895.5		0.5625			116.222	399.75
24Jul2017 14:03:34'	0.33725	0.414577	0	203.527	773		0.593125			114.807	355.25
24Jul2017 14:13:34'	0.398	0.362077	0	196.734	605.75		0.61125			114.127	288.875
24Jul2017 14:23:34'	0.409	0.345787	0	201.082	623.25		0.623125			115.656	272.25
24Jul2017 14:33:33'	0.40825	0.35382	0	195.103	650.25		0.6315			115.429	272.125
24Jul2017 14:43:33'	0.394	0.35677	0	204.342	703		0.632125			116.109	277
24Jul2017 14:53:33'	0.33625	0.410873	0	207.331	918.5		0.633			117.128	329.875
24Jul2017 15:03:34'	0.41175	0.341324	0	202.44	720.5		0.658125			114.127	271.5
24Jul2017 15:13:34'	0.41625	0.33254	0	205.973	750.5		0.670125			114.071	261.625
24Jul2017 15:23:34'	0.3735	0.38289	0	199.723	922.75		0.670125			115.033	300.625
24Jul2017 15:33:34'	0.3655	0.38794	0	202.169	985.25		0.678			115.712	328.5
24Jul2017 15:43:33'	0.36075	0.39102	0	203.527	988		0.676125			116.845	339.125
24Jul2017 15:53:33'	0.3455	0.40929	0	201.082	1048.5		0.680375			116.788	388.375
24Jul2017 16:03:33'	0.343	0.404183	0	207.331	1064.75		0.685875			117.071	440.625
24Jul2017 16:13:33'	0.35125	0.386281	0	215.212	1085.75		0.69475			115.769	524.875
24Jul2017 16:23:34'	0.28025	0.451992	0	219.559	1355.75		0.690375			116.562	709.25
24Jul2017 16:33:34'	0.38075	0.357037	0	214.94	1040		0.700625			114.863	602
24Jul2017 16:43:34'	0.482	0.278354	0	196.462	738.25		0.708125			113.222	473.375
24Jul2017 16:53:34'	0.51925	0.242814	0	195.103	520.75		0.709875			114.127	419
24Jul2017 17:03:33'	0.5505	0.207214	0	198.636	352.25		0.71175			114.467	697.125
24Jul2017 17:13:33'	0.4755	0.272361	0	206.788	552.75		0.70475			116.335	1128.88
24Jul2017 17:23:33'	0.3965	0.3291	0	224.994	734		0.701625			117.128	1170.12
24Jul2017 17:33:34'	0.3835	0.340385	0	226.353	769.25		0.699875			117.298	1191.88
24Jul2017 17:43:34'	0.44125	0.298278	0	213.581	634.25		0.710125			116.901	705.5
24Jul2017 17:53:34'	0.514	0.22691	0	212.494	449		0.717625			118.883	306.75
24Jul2017 18:03:34'	0.56975	0.195419	0	192.658	346		0.71575			118.486	361.5
24Jul2017 18:13:33'	0.647	0.141471	0	173.637	199		0.71975			115.543	221.375
24Jul2017 18:23:33'	0.65825	0.133231	0	171.191	204		0.717			113.335	316.125
24Jul2017 18:33:33'	0.679	0.125948	0	160.05	176.75		0.717625			109.202	308.5
24Jul2017 18:43:34'	0.714	0.0893377	0	161.409	100.25		0.728875			107.674	220.375
24Jul2017 18:53:34'	0.7185	0.0823833	0	163.311	95		0.73425			107.617	212
24Jul2017 19:03:34'	0.7235	0.0766192	0	163.854	91.5		0.741375			107.73	116
24Jul2017 19:13:34'	0.726	0.0740827	0	163.854	83.25		0.748			106.994	77.25
24Jul2017 19:23:33'	0.731	0.0705805	0	162.496	72.5		0.74975			106.938	64.25
24Jul2017 19:33:33'	0.743	0.0636056	0	158.42	56.75		0.7575			105.523	48.375
24Jul2017 19:43:33'	0.75325	0.0570716	0	155.431	38.25		0.76475			103.881	36.875
24Jul2017 19:53:33'	0.766	0.0486648	0	151.898	25.75		0.773375			102.013	26.625
24Jul2017 20:03:34'	0.776	0.0429725	0	148.366	16.75		0.782875			99.6916	17.875
24Jul2017 20:13:34'	0.78825	0.0356489	0	144.29	10.5		0.792			97.6536	11.625
24Jul2017 20:23:34'	0.8015	0.0279039	0	139.67	6		0.80325			95.6156	6.5
24Jul2017 20:33:34'	0.812	0.0241727	0	134.236	3		0.814			93.0115	3
24Jul2017 20:43:33'	0.82175	0.0214798	0	128.529	1.25		0.823125			90.2376	1.125
24Jul2017 20:53:33'	0.82625	0.0275729	0	119.834	0.25		0.82975			87.124	0.25
24Jul2017 21:03:33'	0.828	0.0372275	0	110.595	0		0.83275			82.0291	0
24Jul2017 21:13:34'	0.82925	0.049134	0	99.7256	0		0.834375			75.7453	0
24Jul2017 21:23:34'	0.8305	0.046529	0	100.813	0.25		0.834625			76.8209	0
24Jul2017 21:33:34'	0.83175	0.0394172	0	105.704	0.25		0.834375			78.9155	0
24Jul2017 21:43:34'	0.833	0.0302757	0	112.225	0.5		0.833875			83.3311	0
24Jul2017 21:53:33'	0.8345	0.0121255	0	121.464	0.5		0.832875			89.6715	0
24Jul2017 22:03:33'	0.83425	0.00841502	0	117.116	0.25		0.83275			88.7657	0
24Jul2017 22:13:33'	0.83375	0.00423485	0	111.682	0.5		0.83225			87.9732	0
24Jul2017 22:23:34'	0.833	0	0	104.345	0.25		0.831875			86.841	0
24Jul2017 22:33:34'	0.83325	0	0	96.4648	0.25		0.831375			85.8786	0.125
24Jul2017 22:43:34'	0.83375	0	0	97.0083	0.25		0.830625			86.4447	0.125
24Jul2017 22:53:34'	0.834	0	0	101.628	0		0.83			86.6711	0.25
24Jul2017 23:03:33'	0.83425	0	0	106.791	0		0.829			86.7278	0.375
[truncated: 10,463 more rows]
